# Supplementary material for: Double burden of malnutrition among Indian schoolchildren and its measurement: a cross-sectional study in a single school
Source: PubMed Central journal article supplement — BMJ Paediatr Open. 2020 Feb 2;4(1):e000505. doi: 10.1136/bmjpo-2019-000505 (PMC7015044; doi:10.1136/bmjpo-2019-000505), 2020-02-02
Supplement: bmjpo-2019-000505.draft_revisions.pdf [file bmjpo-2019-000505.draft_revisions.pdf]

# BMJ Paediatrics Open

BMJ Paediatrics Open is committed to open peer review. As part of this commitment we make the peer review history of every article we publish publicly available.

When an article is published we post the peer reviewers' comments and the authors' responses online. We also post the versions of the paper that were used during peer review. These are the versions that the peer review comments apply to.

The versions of the paper that follow are the versions that were submitted during the peer review process. They are not the versions of record or the final published versions. They should not be cited or distributed as the published version of this manuscript.

BMJ Paediatrics Open is an open access journal and the full, final, typeset and author-corrected version of record of the manuscript is available on our site with no access controls, subscription charges or pay-per-view fees (<http://bmjpaedsopen.bmj.com>).

If you have any questions on BMJ Paediatrics Open's open peer review process please email [info.bmjpo@bmj.com](mailto:info.bmjpo@bmj.com)

# BMJ Paediatrics Open

## Double burden of malnutrition among Indian school children

|                               |                                                                                                                                                                                                                                     |
|-------------------------------|-------------------------------------------------------------------------------------------------------------------------------------------------------------------------------------------------------------------------------------|
| Journal:                      | <i>BMJ Paediatrics Open</i>                                                                                                                                                                                                         |
| Manuscript ID                 | bmjpo-2019-000505                                                                                                                                                                                                                   |
| Article Type:                 | Original article                                                                                                                                                                                                                    |
| Date Submitted by the Author: | 12-Apr-2019                                                                                                                                                                                                                         |
| Complete List of Authors:     | Daga, Subhashchandra; Pacific Medical College and Hospital, Pediatrics Mhatre, Sameer; Smt Kashibai Navale Medical College and General Hospital, Paediatrics Kasbe, Abhiram ; Topiwala National Medical College DSouza, Eric; MIMER |
| Keywords:                     | General Paediatrics, Growth, Obesity, School Health, Tropical Paediatrics                                                                                                                                                           |
|                               |                                                                                                                                                                                                                                     |

SCHOLARONE™  
Manuscripts

1  
2  
3 Double burden of malnutrition among Indian school children  
4  
5

6 *Short title: Double burden of malnutrition*  
7  
8  
9

10  
11  
12  
13  
14  
15 SubhashchandraDaga  
16

17  
18 Department of Pediatrics,  
19

20  
21 Pacific Medical College and Hospital, Udaipur  
22  
23

24  
25 Sameer Mhatre  
26

27  
28 Department of Pediatrics,  
29

30  
31 Smt. Kashibai Navle Medical College, Pune  
32  
33

34  
35 Eric DSouza  
36

37  
38 Department of Pediatrics,  
39

40  
41 MIMER Medical College, Talegaon  
42  
43

44  
45 Abhiram Kasbe  
46

47  
48 Department of Pediatrics,  
49

50  
51 Topiwala Medical College, Mumbai  
52  
53  
54  
55  
56  
57  
58  
59  
60

1  
2  
3  
4  
5  
6 Correspondence  
7  
8

9 SubhashchandraDaga  
10

11  
12 Department of Pediatrics, Pacific Medical College and Hospital,  
13

14  
15 Udaipur-313001, India  
16

17  
18 E-mail: dagasubhash49@gmail.com  
19

20  
21  
22 Tel: +91-9960522259  
23  
24  
25  
26  
27  
28  
29  
30  
31  
32  
33  
34  
35  
36  
37  
38  
39  
40  
41  
42  
43  
44  
45  
46  
47  
48  
49  
50  
51  
52  
53  
54  
55  
56  
57  
58  
59  
60

## Abstract

### Objective

To document the extent of double burden of malnutrition (coexistence of over- and under-nutrition) among Indian schoolchildren from lower socioeconomic groups, and to determine if mid-upper arm circumference (MUAC) can be used as a proxy for body mass index (BMI).

### Design

A cross-sectional study

### Setting

A school from the outskirts of a large city with a majority of the children belonging to lower and lower-middle socioeconomic categories

### Subjects

The total number of participants was 1,444, comprising 424 girls and 1,020 boys belonging to playgroups and grades 1-7.

### Interventions

Anthropometric measurements, such as MUAC, height, and weight, were taken from each participant using standard techniques. Descriptive statistics for BMI and MUAC were obtained based on gender; Z-scores were computed using age-specific and sex-specific WHO reference data. The distribution of variables was calculated among all

1  
2  
3 participants, together and separately, for each gender. Homogeneous subsets for BMI  
4 and MUAC were identified the three groups. Age-wise comparisons of BMI and MUAC  
5 were also conducted for each gender.  
6  
7  
8  
9

## 10 11 12 **Main outcome measures**

- 13  
14 1. To know if MUAC and BMI are correlated among both boys and girls.
- 15  
16  
17 2. To study BMI and MUAC Z score distribution among the subjects.  
18  
19

## 20 21 22 **Results**

23  
24 Importantly, MUAC correlated positively with BMI among both boys and girls. The  
25 following BMI Z-score distribution was observed: obese, 21 (1.5%); overweight, 36  
26 (2.5%); pre-obese, 136 (9.4%); severe acute malnutrition (SAM), 5(0.3%); moderate  
27 acute malnutrition (MAM), 146 (10.1%); undernourished, at risk of MAM/SAM, 141  
28 (9.8%). The distribution of categories of children based on MUAC Z-scores was: obese,  
29 19; overweight, 178; pre-obese, 135; SAM, 7; MAM, 181; undernourished, at risk of  
30 MAM/SAM, 181  
31  
32  
33  
34  
35  
36  
37  
38  
39  
40

## 41 42 43 **Conclusions**

44  
45 Obesity/overweight/pre-obese and SAM/MAM/undernourished states coexist among  
46 Indian schoolchildren from lower middle/lower socioeconomic categories. BMI and  
47 MUAC were significantly correlated. MUAC may identify both under-nutrition and over-  
48 nutrition by early detection of aberrant growth.  
49  
50  
51  
52  
53  
54  
55  
56  
57  
58  
59  
60

## Introduction

The double burden of under-nutrition and over-nutrition is emerging as a major problem. According to estimates from 129 countries with available data, 57 experience serious problems of both undernourished children and overweight adults (1). The relationship between under-nutrition and overweight status and obesity is more than coexistence. The double burden of malnutrition (DBM) refers to the coexistence of both under-nutrition and over-nutrition within individuals, households, and populations and across the life course. "Across the life course" refers to the phenomenon that under-nutrition early in life contributes to an increased propensity for over-nutrition during adulthood (2). The occurrence of DBM is attributed to a complex interplay of nutritional transitions (shifting from an active to a sedentary lifestyle, demographic transitions, etc.) from high fertility and early deaths to low fertility and aging populations and epidemiological transitions from communicable to non-communicable diseases(2).

The consequences of DBM are enormous. Early life under-nutrition is associated with approximately one-third of childhood deaths. The survivors, who become stunted during their first two years of life, are prone to infections and are unable to carry out physical work, study, and progress in school. Later in the life course, the double burden of disease is characterized by the coexistence of communicable (infectious disease) and non-communicable diseases. Prior to the 1970s, obesity was a relatively rare condition, even in the wealthiest of nations (3), whereas under-nutrition was a major problem, and nutrition supplementation was the main intervention. Thus, obesity is a relatively new problem in need of attention. A systematic review of obesity and socioeconomic status

1  
2  
3 in developing countries concluded that child obesity is more prevalent among affluent  
4 groups within developing countries (4). This may be attributed to improved access to  
5 surplus/excess food and a higher degree of urbanization and technological progress in  
6 these economies that render activities less laborious, resulting in less energy  
7 expenditure (5). Thus, economic advancement seems inevitably associated with a  
8 rapidly increasing prevalence of obesity. Furthermore, childhood obesity is a strong  
9 predictor of adult obesity. For instance, a Japanese study revealed that approximately  
10 one-third of obese children grew into obese adults (6). Therefore, early detection of  
11 excessive weight gain, and action to prevent its progress, is more likely to succeed than  
12 attempting to reverse obesity later.  
13  
14  
15  
16  
17  
18  
19  
20  
21  
22  
23  
24  
25

26  
27 Body mass index (BMI)-for-age, the internationally recommended measure of obesity,  
28 suggests that Asians are at an increased risk of cardio-metabolic disorders, even at  
29 lower BMI levels, because of a considerably higher body fat percentage (7). Therefore,  
30 the World Health Organization (WHO) recommends lowering the BMI cut-offs for  
31 “overweight” among Asian adults (8) in light of the increased health risks. Therefore,  
32 early detection of an overweight status has become very important in Asia.  
33  
34  
35  
36  
37  
38  
39  
40  
41

42 The selection of height-based parameters, such as BMI for the detection of  
43 overweight/obese children in low-resource settings, has limitations because of the  
44 shortage of stadiometers and trained paramedical staff. A simpler proxy for BMI that  
45 parallels the use of abdominal girth for detecting visceral obesity needs to be developed  
46 (9). The mid-upper arm circumference (MUAC) appears to be a promising alternative in  
47 this regard (10-14). A recent study from the Netherlands reaffirmed that, compared with  
48 BMI, MUAC is a valid measure for detecting overweight/obesity, and thus is a good  
49  
50  
51  
52  
53  
54  
55  
56  
57  
58  
59  
60



1  
2  
3 alternative to BMI (15). Health workers are familiar with MUAC measurement, as it has  
4  
5 been commonly used for identifying severe acute under-nutrition among young (6–60  
6  
7 months of age) children (16).  
8  
9

10  
11 To our knowledge, few studies have focused on the coexistence of under- and over-  
12  
13 nutrition in India. The present study was conducted to document the extent of DBM  
14  
15 among Indian schoolchildren, a key group for intervention, using BMI and MUAC  
16  
17 distributions. The study also examined whether MUAC can be used as a proxy for BMI,  
18  
19 so that MUAC can detect trends toward obesity or severe acute malnutrition (SAM).  
20  
21  
22

## 23 **Participants and Methods**

24  
25  
26  
27 **Setting:** This cross-sectional study was conducted with schoolchildren from the  
28  
29 outskirts of Pune, India. This study was part of the MIMER medical college and  
30  
31 hospital's outreach activities regarding annual school health check-ups. A schedule of  
32  
33 class-wise health check-ups was developed in consultation with the school authorities  
34  
35 who, in turn, sought parents' permission. The study had the approval of the ethics  
36  
37 committee of MIMER medical college and hospital, Talegaon Dabhade. A majority of  
38  
39 the children belonged to lower and lower-middle socioeconomic categories. Children  
40  
41 between 3-5 years were from a playgroup, and those between 6-12 years belonged to  
42  
43 grades 1-7.  
44  
45  
46  
47  
48

49 **Anthropometric measurements:** Anthropometric measurements, such as MUAC,  
50  
51 height, and weight, were taken from each participant using standard techniques. Height  
52  
53 (cm) was measured on a stadiometer (Easy care) without shoes. Weight (kg) was  
54  
55 measured using a digital weighing machine (Meditrin Instruments) in light clothes and  
56  
57  
58  
59  
60

1  
2  
3 without shoes. MUAC (cm) was measured using a non-elastic plastic tape at the  
4  
5 midway between the olecranon and acromion processes on the upper left arm. During  
6  
7 these measurements, the participant was in a comfortable standing position and was  
8  
9 asked to look straight ahead with his/her shoulders in a neutral position. The  
10  
11 participant's arm was straightened, and we ensured that the tape was neither too tight  
12  
13 nor too loose.  
14  
15  
16  
17

18 **Statistical tools:** Open Source Statistical Software PSPP version 1.0.1 was used for all  
19  
20 analyses, and a  $p$ -value  $\leq 0.05$  was considered statistically significant. Mean and  
21  
22 standard deviation (SD), median, inter-quartile range, and Z-scores for BMI and MUAC  
23  
24 were computed by sex for participants with complete measurements. Z-scores were  
25  
26 computed using age-specific and sex-specific reference data from the WHO (17). The  
27  
28 distribution of variables was calculated among all participants together and separately  
29  
30 for boys and girls. Homogeneous subsets for BMI and MUAC were identified in these  
31  
32 three groups. Age-wise comparisons of BMI and MUAC were calculated for both girls  
33  
34 and boys.  
35  
36  
37  
38  
39

40 **Patient involvement:** Patients were not directly involved in the design of this study.  
41  
42  
43  
44  
45  
46  
47  
48  
49

## 50 **Results**

51  
52  
53 The total number of participants was 1,444, comprising 424 girls and 1,020 boys. The  
54  
55 distribution of variables among all participants, girls and boys, is shown in Tables 1 and  
56  
57  
58  
59  
60

1  
2  
3 2. Age, height, weight, and BMI were all significantly different between girls and boys;  
4 boys had higher values for all parameters. MUAC, BMI Z-scores, and MUAC Z-scores,  
5 however, did not significantly differ between boys and girls (suppl. files).  
6  
7  
8  
9

10  
11 BMI and MUAC differed significantly for all participants combined, and separately for  
12 boys and girls, between the ages of 3 to 16 years. Tukey's HSD tests for multiple  
13 comparisons revealed a significant shift in mean BMI at 3, 6, and 10 years whereas for  
14 MUAC, the shift occurred at 4, 6, and 9 years. Thereafter, MUAC changed significantly  
15 almost every year until the age of 16. Thus, in contrast to BMI, MUAC had more age-  
16 dependent variability. BMI change with age was minimal among girls (only at age 14)  
17 compared to changes among boys at 6, 10, 12, and 14 years. Girls had six  
18 homogeneous subsets for MUAC, with the first significant rise at age 4, compared to  
19 nine subsets among boys, with the first shift at age 5. Thus, changes in BMI and MUAC  
20 were more frequent among boys (suppl. files).  
21  
22  
23  
24  
25  
26  
27  
28  
29  
30  
31  
32  
33

34  
35 Importantly, MUAC positively correlated with other anthropometric variables among  
36 girls. Correlations were significant with weight, height, BMI, and BMI Z-scores (Table 3).  
37  
38 These findings were similar for boys (Table 4).  
39  
40  
41  
42

43  
44 Based on BMI Z-scores, the following distribution of overweight children was found:  
45 obese (Z-scores more than 3 SD) - 21 (1.5%), overweight (Z-scores between 2 and 3  
46 SD) - 36 (2.5%), and pre-obese (Z-scores between 1 and 2 SD)-136 (9.4%). At the  
47 other end of the spectrum, among undernourished children, the following distribution  
48 was found: SAM (Z-scores less than 3 SD) -5(0.3%), moderate acute malnutrition  
49 (MAM; Z-scores between -2 and -3 SD) -146 (10.1%), and undernourished at risk of  
50  
51  
52  
53  
54  
55  
56  
57  
58  
59  
60

1  
2  
3 sliding to MAM or SAM (Z-score between -1 and -2 SD) - 141 (9.8%) (Table5). Drawing  
4 parallels to BMI, the distribution of various categories of children based on the MUAC Z-  
5 scores was as follows (Table 6): obese-19 (1.3%), overweight- 178 (12.3%), pre-obese-  
6 135 (9.3%), SAM- 7(0.5%), MAM- 181 (12.5%), and undernourished at risk of MAM or  
7 SAM -181 (12.5%). BMI and MUAC categories had no statistically significant  
8 association with gender (suppl. files). The distribution of nutrition conditions, based on a  
9 modified WHO classification, is provided in (Table 7).

## 20 **Discussion**

21  
22  
23 The present study suggests that DBM has reached Indian school children of lower  
24 middle or lower socioeconomic statuses, which calls for urgent action. Importantly, the  
25 present results identify children at the brink of sliding into severe forms of over- and  
26 under-nutrition. The present study also suggests using a single and simpler method,  
27 MUAC, for detecting both forms of malnutrition by monitoring growth during routine  
28 health check-ups.  
29  
30  
31  
32  
33  
34  
35  
36  
37

38 The World Health Assembly targets were considered in crafting the 2030 development  
39 agenda and are referred to in target 2.2 of the Sustainable Development Goals to “end  
40 all forms of malnutrition.” The reference to “all forms of malnutrition” is important for  
41 acknowledging the existence of the double burden of under-nutrition and overweight.  
42 While the drivers of the double burden of malnutrition are varied and often insidious,  
43 their effects present a clear case for urgent action and demand an integrated response.  
44  
45  
46  
47  
48  
49  
50  
51  
52 Using a single tool for detecting both forms of malnutrition integrates and simplifies the  
53 process.  
54  
55  
56  
57  
58  
59  
60

1  
2  
3 To our knowledge, few studies have focused on this aspect of growth among children in  
4 India, as well as other emerging economies. Based on BMI Z-scores, 21(1.5%) and 36  
5 (3.9%) children were classified as obese and overweight, respectively. At the other end  
6 of the spectrum, a relatively small proportion, 5 (0.3%) and 5 (0.3 %), belonged to SAM  
7 and MAM categories, respectively. MUAC Z-scores suggested the following distribution:  
8 obesity -19(1.3%), overweight -43(4.3%), SAM -1(0.1%), and MAM-(0.4%). An even  
9 greater number of children were leaning towards obesity or overweight, as well as SAM  
10 or MAM. Children who are not yet at the BMI-for-age threshold for the current definition  
11 of childhood obesity or overweight (and SAM or MAM) may be at an increased risk of  
12 developing obesity or severe forms of under-nutrition. One of the present study's aims  
13 was to identify these target groups so that these children's needs could be addressed.  
14  
15  
16  
17  
18  
19  
20  
21  
22  
23  
24  
25  
26  
27  
28  
29

30 The first target group, pre-obese children (BMI or MUACZ-score between 1 and 2 SD),  
31 is at risk of progressing to overweight/obesity. The second group, undernourished  
32 children (BMI or MUACZ-score between -1 and -2 SD), is at risk of sliding into MAM or  
33 SAM. Based on the BMI Z-scores, 136 (9.4%) were pre-obese, and 181 (12.5%) were  
34 undernourished. The equivalent numbers for MUAC were 135 (9.3%) for obesity and  
35 181 (12.5%) for SAM and MAM risk, respectively. These target groups may develop  
36 more severe forms of malnutrition if corrective measures are delayed. The first step in  
37 that direction is to plan face-to-face counseling sessions with parents and children.  
38  
39 School programs are effective at preventing childhood obesity by fostering more  
40 physical activity and recommending healthier diets (18). Counseling for the target  
41 groups will have to be done, keeping in mind that within low-resource settings, places  
42 for play may be scarce, sports infrastructure may be poor, and recreational centers may  
43  
44  
45  
46  
47  
48  
49  
50  
51  
52  
53  
54  
55  
56  
57  
58  
59  
60

1  
2  
3 be lacking (19). Similarly, low family income is linked to greater consumption of low-  
4  
5 quality nutrition and fast food (20).  
6  
7

8  
9 Importantly, MUAC as a single tool can facilitate this cohesive intervention by detecting  
10  
11 both under and over-nutrition during routine growth monitoring without a height-  
12  
13 dependent parameter, such as BMI (Figure). This is because BMI and MUAC are  
14  
15 significantly correlated with each other. However, monitoring for obesity should begin  
16  
17 even earlier, as the most rapid weight gain occurs between ages 2 and 6 among obese  
18  
19 adolescents (21).  
20  
21  
22  
23

24 While India's economy has been growing at an impressive rate, the country still has the  
25  
26 highest number of stunted children in the world (46.8 million), representing one-third of  
27  
28 the global total of stunted children under age 5 (22). Stunting is associated with being  
29  
30 overweight among children in countries that are undergoing a nutritional transition  
31  
32 (23). Economic improvements are accompanied by a conspicuous change in dietary  
33  
34 patterns in the form of increased fat intake (5). This, coupled with low physical activity,  
35  
36 contributes to an increasing prevalence of obesity among adults, which accompanies  
37  
38 the first wave of a cluster of non-communicable diseases, such as hypertension and  
39  
40 diabetes mellitus, called "the new world syndrome" (24).  
41  
42  
43  
44

45  
46 It should be noted, however, that some children classified as obese under this system  
47  
48 may actually have a higher relative weight due to stunting rather than excess adiposity.  
49  
50 Moreover, classification of a child's or adolescent's weight status is complicated by the  
51  
52 fact that height and body composition are continually changing, and such changes often  
53  
54 occur at different rates and times within different populations. Charts showing BMI for  
55  
56  
57  
58  
59  
60

1  
2  
3 healthy children by age indicate an initial rapid rise in the first year, a subsequent  
4  
5 decline for the next 5 years, and then a slow rise into adulthood, making simple  
6  
7 universal adiposity indices of little value. Therefore, there has not been the same level  
8  
9 of agreement on the classification of obesity for children and adolescents as there is for  
10  
11 adults (25).  
12  
13

14  
15  
16 To summarize, until recently, India has considered under-nutrition to be a major  
17  
18 problem, and nutrition supplementation has been the key intervention. At the national  
19  
20 level, India is at stage 1 of the obesity transition with wide sub-national variations (26).  
21  
22 Our study may help in the surveillance effort to address underserved populations  
23  
24 (26). With improved availability of food, a double burden of malnutrition is emerging that  
25  
26 needs to be concurrently addressed. The present study observed the coexistence of  
27  
28 obesity, overweight, pre-obese, and SAM, MAM, and undernourished states among  
29  
30 Indian school children in lower-middle and lower socioeconomic levels. Second, the  
31  
32 present results revealed a significant correlation between BMI and MUAC. This study  
33  
34 provides evidence to suggest that MUAC is a valid, single measurement for identifying  
35  
36 this dual problem of aberrant growth and over-nutrition on the one hand and under-  
37  
38 nutrition on the other, through extended routine growth monitoring of children. However,  
39  
40 more studies are required to establish validity and reliability of this tool.  
41  
42  
43  
44  
45  
46

#### 47 **What is known about the subject?**

- 49 • Emerging economies face a dual problem of under-nutrition and over-nutrition.
- 51 • Its detection is not easy with height-based parameters in low resource setting.

#### 54 **What this study adds?**

- This study suggests that MUAC is a simple, valid, and single measurement for identifying this dual problem in the above setting.

**A funding statement:** This research received no specific grant from any funding agency in the public, commercial or not-for-profit sectors.

**No competing interests:** All authors have completed the ICMJE uniform disclosure form at and declare: no support from any organisation for the submitted work; no financial relationships with any organisations that might have an interest in the submitted work in the previous three years; no other relationships or activities that could appear to have influenced the submitted work.

**Author contribution:**

SD-Conceptualization; Data analysis; Manuscript writing.

SM-Data collection; data analysis; manuscript writing.

AK- Data analysis; manuscript writing.

ED- Data collection; manuscript writing.



## References

1. Nestle M. Rethinking nutritional policies in developing countries taking into account the double burden of malnutrition. [Internet]. Cited 2016 Oct 18]. Available from:<https://ideas4development.org/en/rethinking-nutritional-policies/>
2. Shrimpton R, Rokx C. Health, Nutrition, and Population (HNP) Discussion Paper: The double burden of malnutrition: a review of global evidence. Washington (DC): The World Bank; 2012[cited 2002 Aug 12]. Available from:  
<http://documents.worldbank.org/curated/en/905651468339879888/The-double-burden-of-malnutrition-a-review-of-global-evidence> cited 2002 Aug 12.3. Prentice AM. The double burden of malnutrition in countries passing through the economic transition. *Ann Nutr Metab.* 2018;72(suppl 3):47-54. doi: 10.1159/000487383.
4. Dinsa GD, Goryakin Y, Fumagalli E, Suhrcke M. Obesity and socioeconomic status in developing countries: a systematic review. *ObesRev.* 2012 Nov; 13(11):1067-79. doi: 10.1111/j.1467-789X.2012.01017.
5. Kennedy G, Nantel G, Shetty P. Assessment of the double burden of malnutrition in six case study countries. In: Food and Agriculture Organization of the United Nations (FAO), editor. *The double burden of malnutrition: Case studies from six developing countries.* Rome: FAO; 2006. December 2006. Available from:  
<http://www.fao.org/docrep/009/a0442e/a0442e03.htm.6>
6. Ketal K. Two decades of annual medical examinations in Japanese obese children: do obese children grow into obese adults? *Int J Obes Relat Metab Disord.* 1997 Oct; 21:912-21.

- 1  
2  
3 7. de Wilde JA, vanDommelen P, Middelkoop BJ. Appropriate body mass index cut-offs  
4  
5 to determine thinness, overweight and obesity in south Asian children in the  
6  
7 Netherlands. PLoSOne.2013 Dec;8(12).e82822.doi:10.1371/journal.pone.0082822.  
8  
9  
10  
11 8. World Health Organization Expert Consultation. Appropriate body-mass index for  
12  
13 Asian populations and its implications for policy and intervention strategies. Lancet 2004  
14  
15 Jan 10; 363:157-63.doi: 10.1016/S0140-6736(03)15268-39.Liu A, Hills AP, Hu X, Li Y,  
16  
17 Du L, Xu Y, et al. Waist circumference cut-off values for the prediction of cardiovascular  
18  
19 risk factors clustering in Chinese school-aged children: a cross-sectional study. BMC  
20  
21 Public Health. 2010; 10:82. doi: 10.1186/1471-2458-10-8210.Craig E, Bland R,  
22  
23 Ndirangu J, Reilly JJ.Use of mid-upper arm circumference for determining overweight  
24  
25 and overfatness in children and adolescents. Arch Dis Child.2014 Aug; 99:763-6. doi:  
26  
27 10.1136/archdischild-2013-305137 763.11. ChaputJP, Katzmarzyk PT, Barnes JD,  
28  
29 Fogelholm M, Hu G, Kuriyan R, et al. Mid-upper arm circumference as a screening tool  
30  
31 for identifying children with obesity: a 12-country study. Pediatr Obes. 2017 Dec;  
32  
33 12(6):439-45.doi: 10.1111/ijpo.12162.  
34  
35  
36  
37  
38  
39 12. Asif M, Aslam M, Altaf S. Mid-upper-arm circumference as a screening measure for  
40  
41 identifying children with elevated body mass index: a study for Pakistan. Korean J  
42  
43 Pediatr.2018Jan; 61(1):6-11.doi: 10.3345/kjp.2018.61.1.6  
44  
45  
46  
47 13. Jaiswal M, Bansal R, Agarwal A. Role of mid-upper arm circumference for  
48  
49 determining overweight and obesity in children and adolescents. J Clin Diagn Res. 2017  
50  
51 Aug; 11(8):SC05-SC08.doi: 10.7860/JCDR/2017/27442.10422  
52  
53  
54  
55  
56  
57  
58  
59  
60

1  
2  
3 14. Lu Q, Wang R, Lou DH, Ma CM, Liu XL, Yin FZ. Mid-upper-arm circumference and  
4 arm-to-height ratio in evaluation of overweight and obesity in Han children.  
5

6  
7  
8 *PediatrNeonatology*.2014; 55:14-9.doi: 10.1016/j.pedneo.2013.05.004.  
9

10  
11 15. Talma H, van Dommelen P, Schweizer JJ, Bakker B, Kist-van Holthe JE, Chinpaw  
12 JMM, Hirasing RA. Is mid-upper arm circumference in Dutch children useful in  
13 identifying obesity? *Arch Dis Child*. 2019 Feb;104(2):159-65. doi: 10.1136/archdischild-  
14  
15  
16  
17  
18 2017-313528.  
19

20  
21 16. Roberfroid D, Hammami N, Lachat C, Weise Prinzo Z, Sibson V, Guesdon B, et al.  
22 Utilization of mid-upper arm circumference versus weight-for-height in nutritional  
23 rehabilitation programmes: a systematic review of evidence. Geneva: World Health  
24 Organization; 2013.  
25  
26  
27  
28  
29

30  
31 17. WHO Multicentre Growth Reference Study Group. WHO child growth standards  
32 based on length/height, weight and age. *Acta Paediatr*. 2006; 450(Suppl.):76-85.  
33  
34  
35

36  
37 18. Veugelers PJ, Fitzgerald AL. Effectiveness of school programs in preventing  
38 childhood obesity: a multilevel comparison. *Am J Pub Health*. 2005 Mar; 95(3):432-35.  
39  
40  
41  
42  
43  
44  
45  
46  
47  
48  
49  
50  
51  
52  
53  
54  
55  
56  
57  
58  
59  
60  
doi: 10.2105/AJPH.2004.045898

19. Ludwig J, Sanbonmatsu L, Gennetian L, Adam E, Duncan GJ, Katz LF, et al.  
Neighborhoods, obesity, and diabetes—a randomized social experiment. *N Engl J Med*.  
2011 Oct 20; 365:1509-19.doi: 10.1056/NEJMsa1103216

20. Zenk SN, Powell LM, Rimkus L, Isgor Z, Barker DC, Ohri-Vachaspati P, Chaloupka  
F. Relative and absolute availability of healthier food and beverage alternatives across

1  
2  
3 communities in the United States. Am J PubHealth. 2014Nov; 104(11):2170-8.doi:  
4  
5 10.2105/AJPH.2014.302113  
6

7  
8 21. Geserick M, Vogel M, Gausche R, Lipek T, Spielau U, Keller E, et al. Acceleration of  
9  
10 BMI in early childhood and risk of sustained obesity. N Engl J Med.2018 Oct 4;  
11  
12 379:1303-12. doi: 10.1056/NEJMoa1803527  
13  
14

15  
16 22. UNICEF India. Stunting. December 2018. Available from:  
17  
18 <http://unicef.in/Whatwedo/10/Stunting>.  
19  
20

21  
22 23. Popkin BM, Richards MK, Monteiro CA. Stunting is associated with overweight in  
23  
24 children in countries that are undergoing the nutrition transition.JNutr.1996Dec;  
25  
26 126(12):3009-16.doi: 10.1093/jn/126.12.3009.  
27  
28

29  
30 23. Popkin BM, Richards MK, Monteiro CA. Stunting is associated with overweight in  
31  
32 children in countries that are undergoing the nutrition transition.JNutr.1996Dec;  
33  
34 126(12):3009-16.doi: 10.1093/jn/126.12.3009.  
35  
36

37  
38 24. Kolčić I. Double burden of malnutrition: a silent driver of double burden of disease in  
39  
40 low- and middle-income countries. J Glob Health. 2012 Dec; 2(2):020303.  
41  
42 doi: 10.7189/jogh.02.02030325. Chan RSM, Woo J.Prevention of overweight and  
43  
44 obesity: How effective is the current public health approach.Int J Environ Res Public  
45  
46 Health. 2010 Mar; 7(3):765-83. doi:10.3390/ijerph703076526.  
47  
48  
49  
50  
51  
52  
53  
54  
55  
56  
57  
58  
59  
60

1  
2  
3  
4  
5  
6  
7  
8  
9  
10  
11  
12  
13  
14  
15  
16  
17  
18  
19  
20  
21  
22  
23  
24  
25  
26  
27  
28  
29  
30  
31  
32  
33  
34  
35  
36  
37  
38  
39  
40  
41  
42  
43  
44  
45  
46  
47  
48  
49  
50  
51  
52  
53  
54  
55  
56  
57  
58  
59  
60

26. Jaacks LM, Vandevijvere S, Pan A, McGowan CJ, Wallace C, Imamura F, et al. The obesity transition: Stages of the global epidemic. *Lancet Diabetes Endocrinol.* 2019 Jan. [http://dx.doi.org/10.1016/S2213-8587\(19\)30026-9](http://dx.doi.org/10.1016/S2213-8587(19)30026-9).

Confidential: For Review Only

Table 1

Descriptive statistics for age, sex, and anthropometric characteristics

| Variables ^ | Girls (n=424) |       |        |       | Boys (n=1,020) |       |        |       | Mann-Whitney Test |                           |
|-------------|---------------|-------|--------|-------|----------------|-------|--------|-------|-------------------|---------------------------|
|             | Mean          | SD    | Median | IQR   | Mean           | SD    | Median | IQR   | Z-value           | p-value                   |
| Age (years) | 7.63          | 2.82  | 7.00   | 5.00  | 8.80           | 3.69  | 9.00   | 5.00  | -5.162            | 2.44E-07                  |
|             |               |       |        |       |                |       |        |       |                   | Difference is significant |
| Height (cm) | 125.16        | 16.95 | 125.00 | 26.00 | 134.06         | 22.16 | 133.15 | 34.00 | -6.626            | 3.44E-11                  |
|             |               |       |        |       |                |       |        |       |                   | Difference is significant |
| Body        | 22.48         | 8.83  | 20.20  | 10.40 | 28.93          | 14.96 | 24.20  | 19.4  | -7.21             | 5.41E-                    |

|                             |       |      |       |      |       |      |       |      |                               |      |          |
|-----------------------------|-------|------|-------|------|-------|------|-------|------|-------------------------------|------|----------|
| weight<br>(kg)              |       |      |       |      |       |      |       | 0    | 5                             | 13   |          |
|                             |       |      |       |      |       |      |       |      | Difference is significant     |      |          |
| BMI<br>(kg/m <sup>2</sup> ) | 13.84 | 2.33 | 13.20 | 2.14 | 15.04 | 3.31 | 13.98 | 3.24 | -                             | 7.37 | 1.66E-13 |
|                             |       |      |       |      |       |      |       |      | Difference is significant     |      |          |
| MUAC                        | 17.52 | 2.61 | 16.85 | 3.30 | 18.94 | 3.83 | 17.95 | 5.00 | -                             | 6.23 | 4.59E-10 |
|                             |       |      |       |      |       |      |       |      | Difference is significant     |      |          |
| BMI<br>(Z-Score)            | 0.00  | 0.99 | -0.22 | 1.09 | -0.01 | 1.00 | -0.21 | 1.06 | -                             | 0.50 | 0.616    |
|                             |       |      |       |      |       |      |       |      | Difference is not significant |      |          |
| MUAC<br>(Z-                 | 0.00  | 0.99 | -0.13 | 1.22 | 0.00  | 0.99 | -0.17 | 1.14 | -                             | 0.08 | 0.936    |

|        |  |  |  |  |  |  |  |  |                               |  |
|--------|--|--|--|--|--|--|--|--|-------------------------------|--|
| score) |  |  |  |  |  |  |  |  | 1                             |  |
|        |  |  |  |  |  |  |  |  | Difference is not significant |  |

^ All data failed Shapiro–Wilk Normality Tests. Hence, Mann-Whitney U Rank Sum Tests were applied.

# Ordinal data requiring a Mann-Whitney U Rank Sum Test.

BMI=Body Mass Index; MUAC=Mid-upper-arm circumference

Confidential: For Review Only



Table 2

Distribution of variables among all participants

| Variables        | Mean   | SD    | Median | IQR   | Minimum | Maximum |
|------------------|--------|-------|--------|-------|---------|---------|
| Age (years)      | 8.46   | 3.50  | 9.00   | 6.00  | 3.00    | 16.00   |
| Body weight (kg) | 27.04  | 13.77 | 23.10  | 16.20 | 9.00    | 97.50   |
| Height (cm)      | 131.45 | 21.16 | 130.00 | 32.00 | 84.00   | 188.00  |
| BMI              | 14.69  | 3.10  | 13.78  | 2.89  | 6.58    | 36.10   |
| MUAC             | 18.53  | 3.57  | 17.50  | 4.30  | 12.20   | 35.00   |

SD = standard deviation; IQR = inter-quartile range; BMI = Body Mass Index; MUAC = Mid-upper-arm circumference

Table 3

Correlations between anthropometric parameters among girls (N=424)

|             |                     | MUAC       | Body weight | Height     | BMI        | BMI (Z-score) Internal |
|-------------|---------------------|------------|-------------|------------|------------|------------------------|
| MUAC        | Pearson Correlation | 1          | .897**      | .700**     | .826**     | .567**                 |
|             | Sig. (2-tailed)     |            | 7.340E-152  | 1.207E-063 | 6.856E-107 | 2.020E-037             |
| Body weight | Pearson Correlation | .897**     | 1           | .866**     | .776**     | .422**                 |
|             | Sig. (2-tailed)     | 7.340E-152 |             | 2.851E-129 | 1.933E-086 | 9.136E-020             |
| Height      | Pearson Correlation | .700**     | .866**      | 1          | .385**     | .055                   |
|             | Sig. (2-tailed)     | 1.207E-063 | 2.851E-129  |            | 2.156E-016 | .2594                  |

|                                                             |                     |            |            |            |            |            |
|-------------------------------------------------------------|---------------------|------------|------------|------------|------------|------------|
| BMI                                                         | Pearson Correlation | .826**     | .776**     | .385**     | 1          | .831**     |
|                                                             | Sig. (2-tailed)     | 6.856E-107 | 1.933E-086 | 2.156E-016 |            | 2.161E-109 |
| BMI (Z-score)<br>Internal                                   | Pearson Correlation | .567**     | .422**     | .055       | .831**     | 1          |
|                                                             | Sig. (2-tailed)     | 2.020E-037 | 9.136E-020 | .2594      | 2.161E-109 |            |
| ** Correlation is significant at the 0.01 level (2-tailed). |                     |            |            |            |            |            |

MUAC = Mid-upper-arm circumference; BMI = Body Mass Index

Table 4

Correlations between anthropometric parameters among boys (N=1020)

|             |                     | MUAC       | Body weight | Height     | BMI        | BMI (Z-score) Internal |
|-------------|---------------------|------------|-------------|------------|------------|------------------------|
| MUAC        | Pearson Correlation | 1          | .911**      | .780**     | .847**     | .472**                 |
|             | Sig. (2-tailed)     |            | .00000      | 9.603E-210 | 2.206E-281 | 1.066E-057             |
| Body weight | Pearson Correlation | .911**     | 1           | .886**     | .861**     | .383**                 |
|             | Sig. (2-tailed)     | .0000      |             | .00000     | 1.248E-301 | 6.748E-037             |
| Height      | Pearson Correlation | .780**     | .886**      | 1          | .564**     | .049                   |
|             | Sig. (2-tailed)     | 9.603E-210 | .00000      |            | 1.024E-086 | .1168                  |
| BMI         | Pearson             | .847**     | .861**      | .564**     | 1          | .748**                 |

|                                                             |                        |            |            |            |            |            |
|-------------------------------------------------------------|------------------------|------------|------------|------------|------------|------------|
|                                                             | Correlation            |            |            |            |            |            |
|                                                             | Sig. (2-tailed)        | 2.206E-281 | 1.248E-301 | 1.024E-086 |            | 1.462E-183 |
| BMI (Z-score)<br>Internal                                   | Pearson<br>Correlation | .472**     | .383**     | .049       | .748**     | 1          |
|                                                             | Sig. (2-tailed)        | 1.066E-057 | 6.748E-037 | .1168      | 1.462E-183 |            |
| ** Correlation is significant at the 0.01 level (2-tailed). |                        |            |            |            |            |            |

MUAC = Mid-upper-arm circumference; BMI = Body Mass Index

Table 5

## Distribution of BMI Z-scores

BMI (z-score) Internal

|       |               | Frequency | Percent | Valid Percent | Cumulative Percent |
|-------|---------------|-----------|---------|---------------|--------------------|
| Valid | 1) >+3        | 21        | 1.5     | 1.5           | 1.5                |
|       | 2) >+2 to <+3 | 36        | 2.5     | 2.5           | 3.9                |
|       | 3) >+1 to <+2 | 136       | 9.4     | 9.4           | 13.4               |
|       | 4) 0 to +1    | 391       | 27.1    | 27.1          | 40.4               |
|       | 5) ≥-1 to 0   | 709       | 49.1    | 49.1          | 89.5               |
|       | 6) ≥-2 to <-1 | 141       | 9.8     | 9.8           | 99.3               |
|       | 7) ≥-3 to <-2 | 5         | .3      | .3            | 99.7               |
|       | 8) <-3        | 5         | .3      | .3            | 100.0              |
|       | Total         | 1444      | 100.0   | 100.0         |                    |

Table 6

## Distribution of MUAC Z-scores

|       |                     | Frequency | Percent | Valid Percent | Cumulative Percent |
|-------|---------------------|-----------|---------|---------------|--------------------|
| Valid | 1) >+3 SD           | 19        | 1.3     | 1.3           | 1.3                |
|       | 2) >+2 to <+3       | 43        | 3.0     | 3.0           | 4.3                |
|       | 3) >+1 to <+2       | 135       | 9.3     | 9.3           | 13.6               |
|       | 4) 0 to +1          | 418       | 28.9    | 28.9          | 42.6               |
|       | 5) $\geq$ -1 to 0   | 641       | 44.4    | 44.4          | 87.0               |
|       | 6) $\geq$ -2 to <-1 | 181       | 12.5    | 12.5          | 99.5               |
|       | 7) $\geq$ -3 to <-2 | 6         | .4      | .4            | 99.9               |
|       | 8) <-3              | 1         | .1      | .1            | 100.0              |
|       | Total               | 1444      | 100.0   | 100.0         |                    |

Table 7

Distribution of nutrition conditions based on BMI and MUAC Z-scores \*\*

| <b>Condition</b>             | Based on BMI z-scores         | Based on MUACZ-scores           |
|------------------------------|-------------------------------|---------------------------------|
|                              | No (%)                        | No (%)                          |
| Pre-obese                    | BMI >1 to 2 SD<br>136 (9.4)   | MUAC>1to 2SD<br>135 (9.3)       |
| Overweight                   | BMI>2 to 3 SD<br>36 (2.5)     | MUAC>2 to 3SD<br>43 (3)         |
| Obese                        | BMI >3SD<br>21 (1.5)          | MUAC>3SD<br>19(1.3)             |
| Possible risk of underweight | BMI <-1 to -2 SD<br>141 (9.8) | MUAC ≤ -1 to -2SD<br>181 (12.5) |
| Thin                         | BMI <-2 to -3 SD<br>5 (0.3)   | MUAC<-2 to -3SD<br>6 (0.4)      |



1  
2  
3  
4  
5  
6  
7  
8  
9  
10  
11  
12  
13  
14  
15  
16  
17  
18  
19  
20  
21  
22  
23  
24  
25  
26  
27  
28  
29  
30  
31  
32  
33  
34  
35  
36  
37  
38  
39  
40  
41  
42  
43  
44  
45  
46  
47  
48  
49  
50  
51  
52  
53  
54  
55  
56  
57  
58  
59  
60

|               |                      |                      |
|---------------|----------------------|----------------------|
| Severely thin | BMI <-3SD<br>5 (0.3) | MUAC<-3 SD<br>1(0.1) |
|---------------|----------------------|----------------------|

\*\*Modified WHO Classification of nutrition conditions based on anthropometry

BMI = Body Mass Index; MUAC = Mid-upper-arm circumference

Confidential: For Review Only

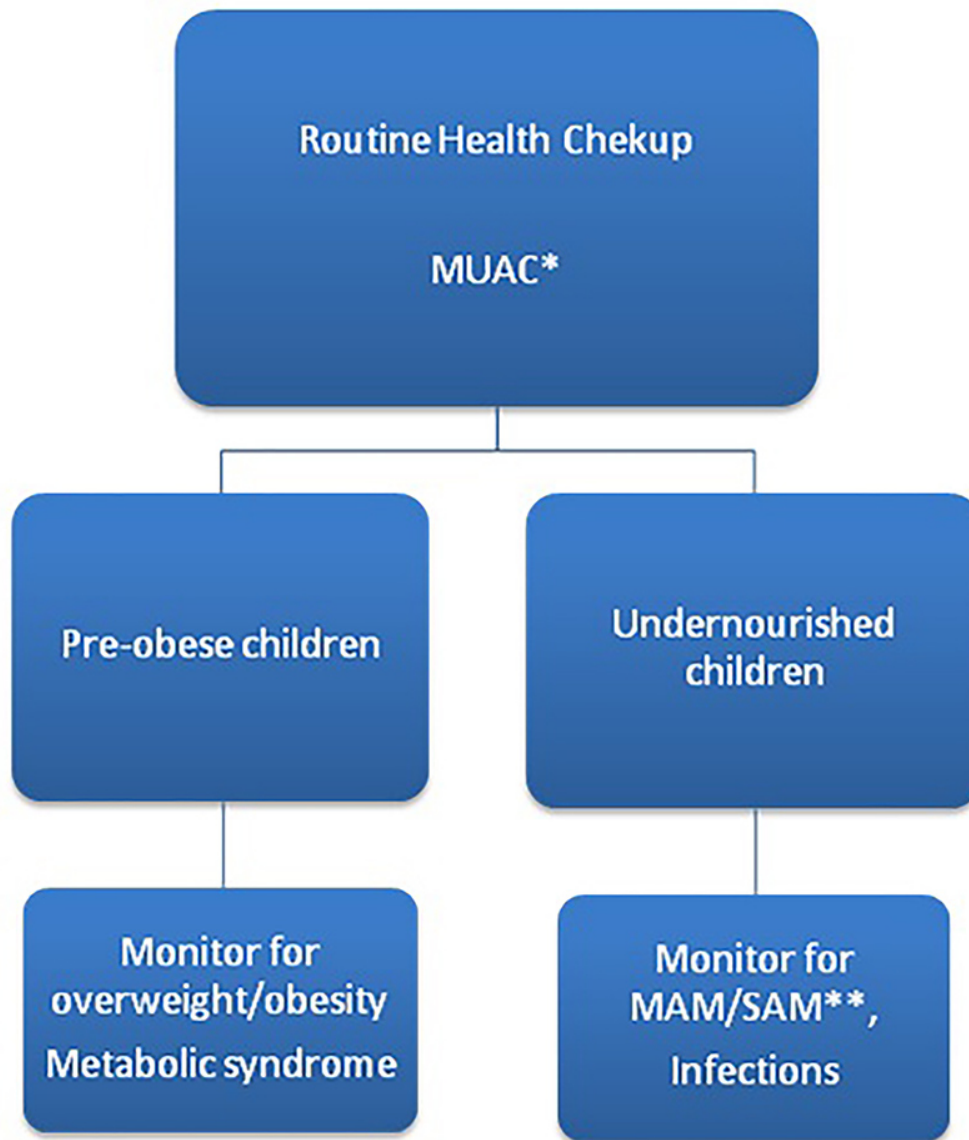

282x327mm (72 x 72 DPI)

Table 1

Age-wise comparisons of BMI among all subjects

| Age (years) | Mean  | SD   | Median | IQR   | F-value                   | p-value   |
|-------------|-------|------|--------|-------|---------------------------|-----------|
| 3           | 13.37 | 1.34 | 13.26  | 1.61  | 56.066                    | 5.73E-118 |
| 4           | 13.04 | 1.69 | 13.07  | 1.46  | Difference is significant |           |
| 5           | 13.01 | 1.13 | 12.80  | 1.02  |                           |           |
| 6           | 13.85 | 2.09 | 13.39  | 1.55  |                           |           |
| 7           | 13.54 | 1.48 | 13.20  | 1.90  |                           |           |
| 8           | 13.94 | 2.22 | 13.37  | 2.01  |                           |           |
| 9           | 13.70 | 1.73 | 13.36  | 1.66  |                           |           |
| 10          | 14.74 | 2.84 | 13.97  | 2.77  |                           |           |
| 11          | 15.48 | 3.03 | 14.89  | 3.60  |                           |           |
| 12          | 15.89 | 3.01 | 15.63  | 3.87  |                           |           |
| 13          | 18.22 | 3.34 | 17.51  | 3.30  |                           |           |
| 14          | 18.33 | 3.88 | 17.28  | 4.53  |                           |           |
| 15          | 19.09 | 4.32 | 18.01  | 6.52  |                           |           |
| 16          | 21.38 | 5.89 | 23.55  | 11.09 |                           |           |

1  
2  
3 One-Way ANOVA applied. SD = standard deviation; IQR = inter-quartile range  
4  
5  
6  
7  
8  
9  
10  
11  
12  
13  
14  
15  
16  
17  
18  
19  
20  
21  
22  
23  
24  
25  
26  
27  
28  
29  
30  
31  
32  
33  
34  
35  
36  
37  
38  
39  
40  
41  
42  
43  
44  
45  
46  
47  
48  
49  
50  
51  
52  
53  
54  
55  
56  
57  
58  
59  
60

Confidential: For Review Only

Table 2

Age-wise comparisons of MUAC among all participants

| Age (years) | Mean  | SD   | Median | IQR  | F-value                   | p-value   |
|-------------|-------|------|--------|------|---------------------------|-----------|
| 3           | 15.39 | 1.24 | 15.20  | 1.50 | 140.727                   | 1.10E-244 |
| 4           | 15.50 | 1.16 | 15.50  | 1.10 | Difference is significant |           |
| 5           | 16.19 | 1.17 | 15.95  | 1.20 |                           |           |
| 6           | 16.83 | 2.07 | 16.50  | 1.95 |                           |           |
| 7           | 16.98 | 1.75 | 16.70  | 2.00 |                           |           |
| 8           | 17.97 | 2.11 | 17.50  | 1.61 |                           |           |
| 9           | 17.79 | 1.78 | 17.50  | 2.08 |                           |           |
| 10          | 19.02 | 2.63 | 18.50  | 3.45 |                           |           |
| 11          | 20.16 | 3.04 | 19.50  | 3.93 |                           |           |
| 12          | 20.87 | 2.79 | 20.50  | 4.00 |                           |           |
| 13          | 22.91 | 2.79 | 22.50  | 2.60 |                           |           |
| 14          | 23.53 | 3.64 | 23.00  | 4.95 |                           |           |
| 15          | 24.66 | 3.73 | 23.50  | 5.23 |                           |           |
| 16          | 25.81 | 4.63 | 27.20  | 7.75 |                           |           |

1  
2  
3 One-Way ANOVA applied. SD = standard deviation; IQR = inter-quartile range  
4  
5  
6  
7  
8  
9  
10  
11  
12  
13  
14  
15  
16  
17  
18  
19  
20  
21  
22  
23  
24  
25  
26  
27  
28  
29  
30  
31  
32  
33  
34  
35  
36  
37  
38  
39  
40  
41  
42  
43  
44  
45  
46  
47  
48  
49  
50  
51  
52  
53  
54  
55  
56  
57  
58  
59  
60

Confidential: For Review Only

Table 3

Homogeneous Subsets: BMI (Tukey's HSD)

| Age (years) | No. | Subset for alpha = 0.05 |        |        |        |        |   |
|-------------|-----|-------------------------|--------|--------|--------|--------|---|
|             |     | 1                       | 2      | 3      | 4      | 5      | 6 |
| 5           | 132 | 13.011                  |        |        |        |        |   |
| 4           | 146 | 13.038                  |        |        |        |        |   |
| 3           | 102 | 13.366                  | 13.366 |        |        |        |   |
| 7           | 156 | 13.537                  | 13.537 |        |        |        |   |
| 9           | 72  | 13.696                  | 13.696 |        |        |        |   |
| 6           | 109 | 13.852                  | 13.852 | 13.852 |        |        |   |
| 8           | 65  | 13.939                  | 13.939 | 13.939 |        |        |   |
| 10          | 220 |                         | 14.740 | 14.740 | 14.740 |        |   |
| 11          | 182 |                         |        | 15.481 | 15.481 |        |   |
| 12          | 77  |                         |        |        | 15.892 |        |   |
| 13          | 30  |                         |        |        |        | 18.224 |   |
| 14          | 72  |                         |        |        |        | 18.325 |   |
| 15          | 72  |                         |        |        |        | 19.094 |   |

|      |   |       |       |       |       |       |        |
|------|---|-------|-------|-------|-------|-------|--------|
| 16   | 9 |       |       |       |       |       | 21.380 |
| Sig. |   | 0.836 | 0.232 | 0.059 | 0.529 | 0.892 | 1.000  |

Means for groups in homogeneous subsets are displayed.

BMI = Body Mass Index



Table 4

Homogeneous subsets: MUAC – Tukey's HSD (all subjects)

| Age<br>(years) | No | Subset for alpha = 0.05 |       |       |       |   |   |   |   |   |
|----------------|----|-------------------------|-------|-------|-------|---|---|---|---|---|
|                |    | 1                       | 2     | 3     | 4     | 5 | 6 | 7 | 8 | 9 |
| 3              | 10 | 15.38                   |       |       |       |   |   |   |   |   |
|                | 2  | 5                       |       |       |       |   |   |   |   |   |
| 4              | 14 | 15.50                   | 15.50 |       |       |   |   |   |   |   |
|                | 6  | 0                       | 0     |       |       |   |   |   |   |   |
| 5              | 13 | 16.19                   | 16.19 |       |       |   |   |   |   |   |
|                | 2  | 4                       | 4     |       |       |   |   |   |   |   |
| 6              | 10 | 16.82                   | 16.82 | 16.82 |       |   |   |   |   |   |
|                | 9  | 6                       | 6     | 6     |       |   |   |   |   |   |
| 7              | 15 |                         | 16.97 | 16.97 |       |   |   |   |   |   |
|                | 6  |                         | 9     | 9     |       |   |   |   |   |   |
| 9              | 72 |                         |       | 17.79 | 17.79 |   |   |   |   |   |
|                |    |                         |       | 4     | 4     |   |   |   |   |   |
| 8              | 65 |                         |       | 17.97 | 17.97 |   |   |   |   |   |
|                |    |                         |       | 2     | 2     |   |   |   |   |   |

|      |         |       |      |       |            |            |            |            |            |       |
|------|---------|-------|------|-------|------------|------------|------------|------------|------------|-------|
| 10   | 22<br>0 |       |      |       | 19.01<br>5 | 19.01<br>5 |            |            |            |       |
| 11   | 18<br>2 |       |      |       |            | 20.16<br>1 | 20.16<br>1 |            |            |       |
| 12   | 77      |       |      |       |            |            | 20.87<br>1 |            |            |       |
| 13   | 30      |       |      |       |            |            | 22.90<br>7 |            |            |       |
| 14   | 72      |       |      |       |            |            | 23.53<br>2 | 23.53<br>2 |            |       |
| 15   | 72      |       |      |       |            |            |            | 24.65<br>8 | 24.65<br>8 |       |
| 16   | 9       |       |      |       |            |            |            |            | 25.81<br>1 |       |
| Sig. |         | 0.102 | 0.08 | 0.421 | 0.314      | 0.423      | 0.961      | 0.987      | 0.452      | 0.412 |

Means for groups in homogeneous subsets are displayed.

MUAC = Mid-upper-arm circumference

Table 5

Cross tabulation of BMI (Z-score) internal and gender

|                        |               |              | Gender |       | Total |
|------------------------|---------------|--------------|--------|-------|-------|
|                        |               |              | Female | Male  |       |
| BMI (Z-score) Internal | 1) >+3        | Count        | 5      | 16    | 21    |
|                        |               | % within Sex | 1.2%   | 1.6%  | 1.5%  |
|                        | 2) >+2 to <+3 | Count        | 11     | 25    | 36    |
|                        |               | % within Sex | 2.6%   | 2.5%  | 2.5%  |
|                        | 3) >+1 to <+2 | Count        | 47     | 89    | 136   |
|                        |               | % within Sex | 11.1%  | 8.7%  | 9.4%  |
|                        | 4) 0 to +1    | Count        | 109    | 282   | 391   |
|                        |               | % within Sex | 25.7%  | 27.6% | 27.1% |
|                        | 5) ≥-1 to 0   | Count        | 209    | 500   | 709   |
|                        |               | % within Sex | 49.3%  | 49.0% | 49.1% |

|                        |              |        |        |        |
|------------------------|--------------|--------|--------|--------|
| 6) $\geq -2$ to $< -1$ | Count        | 39     | 102    | 141    |
|                        | % within Sex | 9.2%   | 10.0%  | 9.8%   |
| 7) $\geq -3$ to $< -2$ | Count        | 3      | 2      | 5      |
|                        | % within Sex | .7%    | .2%    | .3%    |
| 8) $< -3$              | Count        | 1      | 4      | 5      |
|                        | % within Sex | .2%    | .4%    | .3%    |
| Total                  | Count        | 424    | 1020   | 1444   |
|                        | % within Sex | 100.0% | 100.0% | 100.0% |

## Chi-Square Tests

|                    | Value              | df | Asymp. Sig. (2-sided) |
|--------------------|--------------------|----|-----------------------|
| Pearson Chi-Square | 5.199 <sup>a</sup> | 7  | .636                  |
| Likelihood Ratio   | 4.931              | 7  | .668                  |
| N of Valid Cases   | 1444               |    |                       |

1  
2  
3  
4  
5  
6  
7  
8  
9  
10  
11  
12  
13  
14  
15  
16  
17  
18  
19  
20  
21  
22  
23  
24  
25  
26  
27  
28  
29  
30  
31  
32  
33  
34  
35  
36  
37  
38  
39  
40  
41  
42  
43  
44  
45  
46  
47  
48  
49  
50  
51  
52  
53  
54  
55  
56  
57  
58  
59  
60

|                                                                                                   |  |  |  |
|---------------------------------------------------------------------------------------------------|--|--|--|
|                                                                                                   |  |  |  |
| <sup>a</sup> 4 cells (25.0%) have expected count less than 5. The minimum expected count is 1.47. |  |  |  |

BMI = Body Mass Index

Confidential: For Review Only

Table 6

## Cross tabulation of MUAC (Z-score) internal and gender

|                        |              |              | Gender |       | Total |
|------------------------|--------------|--------------|--------|-------|-------|
|                        |              |              | Female | Male  |       |
| MAC (Z-score) Internal | 1)>+3        | Count        | 3      | 16    | 19    |
|                        |              | % within Sex | .7%    | 1.6%  | 1.3%  |
|                        | 2)>+2 to <+3 | Count        | 17     | 26    | 43    |
|                        |              | % within Sex | 4.0%   | 2.5%  | 3.0%  |
|                        | 3)>+1 to <+2 | Count        | 38     | 97    | 135   |
|                        |              | % within Sex | 9.0%   | 9.5%  | 9.3%  |
|                        | 4)0 to +1    | Count        | 131    | 287   | 418   |
|                        |              | % within Sex | 30.9%  | 28.1% | 28.9% |
|                        | 5)≥-1 to 0   | Count        | 178    | 463   | 641   |
|                        |              | % within Sex | 42.0%  | 45.4% | 44.4% |
|                        | 6)≥-2 to <-1 | Count        | 55     | 126   | 181   |

|       |                |              |        |        |        |
|-------|----------------|--------------|--------|--------|--------|
|       |                | % within Sex | 13.0%  | 12.4%  | 12.5%  |
|       | 7) ≥ -3 to <-2 | Count        | 2      | 4      | 6      |
|       |                | % within Sex | .5%    | .4%    | .4%    |
|       | 8) <-3         | Count        | 0      | 1      | 1      |
|       |                | % within Sex | .0%    | .1%    | .1%    |
| Total |                | Count        | 424    | 1020   | 1444   |
|       |                | % within Sex | 100.0% | 100.0% | 100.0% |

## Chi-Square Tests

|                    | Value              | df | Asymp. Sig. (2-sided) |
|--------------------|--------------------|----|-----------------------|
| Pearson Chi-Square | 6.054 <sup>a</sup> | 7  | .533                  |
| Likelihood Ratio   | 6.429              | 7  | .491                  |
| N of Valid Cases   | 1444               |    |                       |

<sup>a</sup> 4 cells (25.0%) have expected count less than 5. The minimum expected count is .29.

# BMJ Paediatrics Open

## Double burden of malnutrition among Indian school children and its measurement

|                               |                                                                                                                                                                                                                                     |
|-------------------------------|-------------------------------------------------------------------------------------------------------------------------------------------------------------------------------------------------------------------------------------|
| Journal:                      | <i>BMJ Paediatrics Open</i>                                                                                                                                                                                                         |
| Manuscript ID                 | bmjpo-2019-000505.R1                                                                                                                                                                                                                |
| Article Type:                 | Original research                                                                                                                                                                                                                   |
| Date Submitted by the Author: | 15-Jun-2019                                                                                                                                                                                                                         |
| Complete List of Authors:     | Daga, Subhashchandra; Pacific Medical College and Hospital, Pediatrics Mhatre, Sameer; Smt Kashibai Navale Medical College and General Hospital, Paediatrics Kasbe, Abhiram ; Topiwala National Medical College DSouza, Eric; MIMER |
| Keywords:                     | General Paediatrics, Growth, Obesity, School Health, Tropical Paediatrics                                                                                                                                                           |
|                               |                                                                                                                                                                                                                                     |

SCHOLARONE™  
Manuscripts



1  
2  
3 1  
4  
5  
6  
7 2  
8  
9  
10  
11 3  
12  
13  
14  
15 4 Double burden of malnutrition among Indian school children **and its**  
16  
17  
18 5 **measurement**  
19  
20  
21

22 6 Short title: Measuring double burden of malnutrition  
23  
24  
25 7  
26  
27

28 8 SubhashchandraDaga<sup>1\*</sup>, Sameer Mhatre<sup>2</sup>, Eric Dsouza<sup>3</sup>, Abhiram Kasbe<sup>4</sup>  
29  
30  
31 9  
32  
33

34 10 <sup>1</sup>Department of Pediatrics,Pacific Medical College and Hospital, Udaipur, India  
35  
36

37 11 <sup>2</sup>Department of Pediatrics,Smt. KashibaiNavle Medical College, Pune, India  
38  
39

40 12 <sup>3</sup> Department of Pediatrics,MIMER Medical College, Talegaon, India  
41  
42

43 13 <sup>4</sup>Department of Pediatrics,Topiwala Medical College, Mumbai, India  
44  
45  
46  
47 14  
48  
49  
50 15  
51  
52

53 16 \*Corresponding author  
54  
55  
56  
57  
58  
59  
60

1  
2  
3 17 E-mail: [dagasubhash49@gmail.com](mailto:dagasubhash49@gmail.com) (SD)  
4  
5

6 18 Tel: +91-9960522259  
7  
8

9  
10 19

## 11 12 13 20 **Abstract** 14 15

### 16 17 18 21 **Objective** 19

20 22 This cross-sectional study aimed to document the extent of double burden of malnutrition  
21  
22 (coexistence of over- and under-nutrition) among Indian schoolchildren from lower  
23 23  
24 socioeconomic groups, and to determine if mid-upper arm circumference (MUAC) can be used  
25 24  
26 as a proxy for body mass index (BMI).  
27 25  
28  
29  
30

### 31 26 **Design** 32

33  
34 27 **A cross-sectional study**  
35  
36

### 37 28 **Setting** 38

39 29 A school in the outskirts of a large city, with a majority of the children belonging to lower and  
40  
41 lower-middle socioeconomic categories.  
42 30  
43  
44

### 45 31 **Subjects** 46 47 48

49 32 The total number of participants was 1,444, comprising 424 girls and 1,020 boys belonging to  
50  
51 33 playgroups and grades 1-7.  
52  
53

### 54 34 **Measurements** 55 56 57 58 59 60

1  
2  
3 35 Anthropometric measurements, such as participants' MUAC, height, and weight were measured  
4  
5 36 using standard techniques. Descriptive statistics for BMI and MUAC were obtained based on  
6  
7 37 gender; Z-scores were computed using age-specific and sex-specific WHO reference data. The  
8  
9 38 distribution of variables was calculated for three groups: all participants together and separately  
10  
11 39 for each gender. Homogeneous subsets for BMI and MUAC were identified in the three groups.  
12  
13  
14 40 Age-wise comparisons of BMI and MUAC were conducted for each gender.  
15  
16  
17  
18

#### 19 41 **Main outcome measures**

- 20 42 1. To know if MUAC and BMI are correlated among both boys and girls.
  - 21 43 2. To study BMI and MUAC Z score distribution among the subjects.
- 22  
23  
24  
25  
26  
27

#### 28 44 **Results**

29 45 The MUAC positively correlated with BMI in both boys and girls. The following BMI Z-score  
30  
31 46 distribution was observed: obese, 21 (1.5%); overweight, 36 (2.5%); pre-obese, 136 (9.4%);  
32  
33 47 severe acute malnutrition (SAM), 5(0.3%); moderate acute malnutrition (MAM), 146 (10.1%);  
34  
35 48 undernourished, at risk of MAM/SAM, 141 (9.8%). The distribution of categories of children  
36  
37 49 based on MUAC Z-scores was: obese, 19 (1.3%), overweight, 178 (12.3%), pre-obese, 135  
38  
39 50 (9.3%), SAM, 7(0.5%), MAM, 181 (12.5%), and undernourished at risk of MAM or SAM, 181  
40  
41 51 (12.5%).  
42  
43  
44  
45  
46  
47

#### 48 52 **Conclusions**

49  
50  
51 53 Obesity/overweight/pre-obese and SAM/MAM/undernourished states, undernutrition more than  
52  
53 54 overweight, coexist among Indian schoolchildren from lower middle/lower socioeconomic  
54  
55  
56  
57  
58  
59  
60

1  
2  
3 55 categories. BMI and MUAC were significantly correlated. MUAC may identify both under-  
4  
5 56 nutrition and over-nutrition by early detection of aberrant growth.  
6  
7  
8  
9  
10  
11  
12  
13  
14  
15  
16  
17  
18  
19  
20  
21  
22  
23  
24  
25  
26  
27  
28  
29  
30  
31  
32  
33  
34  
35  
36  
37  
38  
39  
40  
41  
42  
43  
44  
45  
46  
47  
48  
49  
50  
51  
52  
53  
54  
55  
56  
57  
58  
59  
60

Confidential: For Review Only

## 57 Introduction

58 The double burden of under-nutrition and over-nutrition is emerging as a major problem.  
59 According to estimates from 129 countries with available data, 57 experience serious problems  
60 of both undernourished children and overweight adults [1]. The relationship between under-  
61 nutrition and overweight status and obesity is more than coexistence. The double burden of  
62 malnutrition (DBM) refers to the coexistence of both under-nutrition and over-nutrition within  
63 individuals, households, and populations and across the life course. “Across the life course”  
64 refers to the phenomenon that under-nutrition early in life contributes to an increased propensity  
65 for over-nutrition during adulthood [2]. The occurrence of DBM is attributed to a complex  
66 interplay of nutritional transitions (shifting from an active to a sedentary lifestyle, demographic  
67 transitions, etc.) from high fertility and early deaths to low fertility and aging populations and  
68 epidemiological transitions from communicable to non-communicable diseases [2].

69 The consequences of DBM are enormous. Early life under-nutrition is associated with  
70 approximately one-third of childhood deaths. The survivors, who become stunted during their  
71 first two years of life, are prone to infections and are unable to carry out physical work, study,  
72 and progress in school. Later in the life course, the double burden of disease is characterized by  
73 the coexistence of communicable (infectious disease) and non-communicable diseases. Prior to  
74 the 1970s, obesity was a relatively rare condition, even in the wealthiest of nations [3],  
75 whereas under-nutrition was a major problem, and nutrition supplementation was the main  
76 intervention. Thus, obesity is a relatively new problem in need of attention. A systematic review  
77 of obesity and socioeconomic status in developing countries concluded that child obesity is more  
78 prevalent among affluent groups within developing countries [4]. This may be attributed

1  
2  
3 79 to improved access to surplus/excess food and a higher degree of urbanization and technological  
4  
5 80 progress in these economies that render activities less laborious, resulting in less energy  
6  
7  
8 81 expenditure [5]. Thus, economic advancement seems inevitably associated with a rapidly  
9  
10 82 increasing prevalence of obesity. Furthermore, childhood obesity is a strong predictor of adult  
11  
12 83 obesity. For instance, a Japanese study revealed that approximately one-third of obese children  
13  
14 84 grew into obese adults [6]. Therefore, early detection of excessive weight gain, and action to  
15  
16  
17 85 prevent its progress, is more likely to succeed than attempting to reverse obesity later.  
18  
19

20 86       Body mass index (BMI)-for-age, the internationally recommended measure of obesity,  
21  
22 87 suggests that Asians are at an increased risk of cardio-metabolic disorders, even at lower BMI  
23  
24  
25 88 levels, because of a considerably higher body fat percentage [7]. Therefore, the World Health  
26  
27 89 Organization (WHO) recommends lowering the BMI cut-offs for “overweight” among Asian  
28  
29  
30 90 adults [8] in light of the increased health risks. Therefore, early detection of an overweight status  
31  
32 91 has become very important in Asia.  
33  
34

35 92       The selection of height-based parameters, such as BMI for the detection of  
36  
37 93 overweight/obese children in low-resource settings, has limitations because of the shortage of  
38  
39  
40 94 stadiometers and trained paramedical staff. A simpler proxy for BMI that parallels the use of  
41  
42 95 abdominal girth for detecting visceral obesity needs to be developed [9]. The mid-upper arm  
43  
44 96 circumference (MUAC) appears to be a promising alternative in this regard [10–14]. A recent  
45  
46  
47 97 study from the Netherlands reaffirmed that, compared with BMI, MUAC is a valid measure for  
48  
49 98 detecting overweight/obesity, and thus is a good alternative to BMI [15]. Health workers are  
50  
51 99 familiar with MUAC measurement, as it has been commonly used for identifying severe acute  
52  
53  
54 100 under-nutrition among young (6–60 months of age) children [16].  
55  
56  
57  
58  
59  
60

1  
2  
3 101 To our knowledge, few studies have focused on the coexistence of under- and over-  
4  
5 102 nutrition in India. The present study was conducted to document the extent of DBM among  
6  
7 103 Indian schoolchildren, a key group for intervention, using BMI and MUAC distributions. The  
8  
9 104 study also examined whether MUAC can be used as a proxy for BMI, so that MUAC can detect  
10  
11 105 trends toward obesity or severe acute malnutrition (SAM).  
12  
13  
14

## 15 106 **Participants and Methods**

### 16 107 **Setting**

17  
18  
19  
20  
21  
22 108 This cross-sectional study was conducted with schoolchildren from the outskirts of Pune,  
23  
24 109 India. This study was part of the MIMER medical college and hospital's outreach activities  
25  
26 110 regarding annual school health check-ups. A schedule of class-wise health check-ups was  
27  
28 111 developed in consultation with the school authorities who, in turn, sought parents' permission.  
29  
30 112 The study had the approval of the ethics committee of MIMER medical college and hospital,  
31  
32 113 Talegaon Dabhade. A majority of the children belonged to lower and lower-middle  
33  
34 114 socioeconomic categories. Children between 3–5 years were from a playgroup, and those  
35  
36 115 between 6–12 years belonged to grades 1–7.  
37  
38  
39  
40  
41

### 42 116 **Anthropometric measurements**

43  
44  
45 117 Anthropometric measurements, such as MUAC, height, and weight, were taken from  
46  
47 118 each participant using standard techniques. Height (cm) was measured on a stadiometer (Easy  
48  
49 119 care) without shoes. Weight (kg) was measured using a digital weighing machine (Meditrin  
50  
51 120 Instruments) in light clothes and without shoes. MUAC (cm) was measured using a non-elastic  
52  
53 121 plastic tape at the midway between the olecranon and acromion processes on the upper left arm.  
54  
55  
56  
57  
58  
59  
60

1  
2  
3 122 During these measurements, the participant was in a comfortable standing position and was  
4  
5 123 asked to look straight ahead with his/her shoulders in a neutral position. The participant's arm  
6  
7  
8 124 was straightened, and we ensured that the tape was neither too tight nor too loose.  
9

## 10 11 125 **Statistical tools**

12  
13  
14 126 Open Source Statistical Software PSPP version 1.0.1 was used for all analyses, and a *p*-  
15  
16 127 value  $\leq 0.05$  was considered statistically significant. Mean and standard deviation (SD), median,  
17  
18 128 inter-quartile range, and Z-scores for BMI and MUAC were computed by sex for participants  
19  
20 129 with complete measurements. Z-scores were computed using age-specific and sex-specific  
21  
22  
23 130 reference data from the WHO [17]. The distribution of variables was calculated among all  
24  
25  
26 131 participants together and separately for boys and girls. Homogeneous subsets for BMI and  
27  
28 132 MUAC were identified in these three groups. Age-wise comparisons of BMI and MUAC were  
29  
30 133 calculated for both girls and boys.  
31

## 32 33 134 **Patient involvement**

34  
35  
36 135 Patients were not directly involved in the design of this study.  
37  
38  
39  
40  
41  
42  
43  
44  
45  
46  
47  
48  
49  
50  
51  
52  
53  
54  
55  
56  
57  
58  
59  
60



## 136 Results

137 The total number of participants was 1,444, comprising 424 girls and 1,020 boys. The  
138 distribution of variables among all participants, girls and boys, is shown in Tables 1 and 2. Age,  
139 height, weight, MUAC, and BMI were all significantly different between girls and boys; boys  
140 had higher values for all parameters.

141 BMI and MUAC showed age-wise differences for all participants combined, and separately for  
142 boys and girls, between the ages of 3 to 16 years. Tukey's HSD tests for homogeneous  
143 subsets revealed a significant shift in mean BMI at 3, 6, and 10 years whereas for MUAC, the  
144 shift occurred at 4, 6, and 9 years. Thereafter, MUAC changed significantly almost every year  
145 until the age of 16. Thus, in contrast to BMI, MUAC had more age-dependent variability. BMI  
146 change with age was minimal in girls (only at age 14) compared to changes in boys at 6, 10,  
147 12, and 14 years. Girls had six homogeneous subsets for MUAC, with the first significant rise at  
148 age of 4 years, compared to nine subsets in boys, with the first shift at age 5. Thus, changes in  
149 BMI and MUAC were more frequent in boys (supplementary files). **Importantly, MUAC was**  
150 **positively correlated with weight, height, and BMI both in both girls and boys (Tables 3**  
151 **and 4).**

152 Based on BMI Z-scores, the following distribution of overweight children was found: obese (Z-  
153 scores more than 3 SD) - 21 (1.5%), overweight (Z-scores between 2 and 3 SD) - 36 (2.5%), and  
154 pre-obese (Z-scores between 1 and 2 SD) - 136 (9.4%). At the other end of the spectrum, among  
155 undernourished children, the following distribution was found: SAM (Z-scores less than 3 SD) -  
156 5 (0.3%), moderate acute malnutrition (MAM; Z-scores between -2 and -3 SD) - 146 (10.1%), and  
157 undernourished at risk of sliding to MAM or SAM (Z-score between -1 and -2 SD) - 141 (9.8%)

1  
2  
3 158 (Table and Figure 2). Drawing parallels to BMI, the distribution of various categories of  
4  
5 159 children based on the MUAC Z-scores was as follows (Table 6 and Figure 3): obese-19 (1.3%),  
6  
7 160 overweight- 178 (12.3%), pre-obese-135 (9.3%), SAM- 7(0.5%), MAM- 181 (12.5%), and  
8  
9 161 undernourished at risk of MAM or SAM -181 (12.5%). BMI and MUAC categories had no  
10  
11 162 statistically significant association with gender (suppl. files). The distribution of nutrition  
12  
13 163 conditions, based on a modified WHO classification, is provided in (Table 7).  
14  
15  
16  
17

## 18 164 Discussion

19  
20  
21 165 The present study suggests that DBM has reached Indian school children of lower middle  
22  
23 166 or lower socioeconomic statuses, which calls for urgent action. Importantly, the present results  
24  
25 167 identify children at the brink of sliding into severe forms of over- and under-nutrition. The  
26  
27 168 present study also suggests using a single and simpler method, MUAC, for detecting both forms  
28  
29 169 of malnutrition by monitoring growth during routine health check-ups.  
30  
31  
32

33 170 The World Health Assembly targets were considered in crafting the 2030 development  
34  
35 171 agenda and are referred to in target 2.2 of the Sustainable Development Goals to “end all forms  
36  
37 172 of malnutrition.” The reference to “all forms of malnutrition” is important for acknowledging the  
38  
39 173 existence of the double burden of under-nutrition and overweight. While the drivers of the  
40  
41 174 double burden of malnutrition are varied and often insidious, their effects present a clear case for  
42  
43 175 urgent action and demand an integrated response. Using a single tool for detecting both forms of  
44  
45 176 malnutrition integrates and simplifies the process.  
46  
47  
48  
49

50 177 To our knowledge, few studies have focused on this aspect of growth among children in  
51  
52 178 India, as well as other emerging economies. Based on BMI Z-scores, 21(1.5%) and 36 (3.9%)  
53  
54 179 children were classified as obese and overweight, respectively. At the other end of the spectrum,  
55  
56  
57  
58  
59  
60

1  
2  
3 180 a relatively small proportion, 5 (0.3%) and 5 (0.3 %), belonged to SAM and MAM categories,  
4  
5 181 respectively. MUAC Z-scores suggested the following distribution: obesity -19(1.3%),  
6  
7 182 overweight -43(4.3%), SAM -1(0.1%), and MAM-(0.4%). An even greater number of children  
8  
9  
10 183 were leaning towards obesity or overweight, as well as SAM or MAM. Children who are not yet  
11  
12 184 at the BMI-for-age threshold for the current definition of childhood obesity or overweight (and  
13  
14 185 SAM or MAM) may be at an increased risk of developing obesity or severe forms of under-  
15  
16  
17 186 nutrition. One of the present study's aims was to identify these target groups so that these  
18  
19 187 children's needs could be addressed.

20  
21  
22  
23 188 The first target group, pre-obese children (BMI or MUACZ-score between 1 and 2 SD),  
24  
25 189 is at risk of progressing to overweight/obesity. The second group, undernourished children (BMI  
26  
27 190 or MUACZ-score between -1 and -2 SD), is at risk of sliding into MAM or SAM. Based on the  
28  
29  
30 191 BMI Z-scores, 136 (9.4%) were pre-obese, and 181 (12.5%) were undernourished. The  
31  
32 192 equivalent numbers for MUAC were 135 (9.3%) for obesity and 181 (12.5%) for SAM and  
33  
34 193 MAM risk, respectively. More children were at risk of severe undernutrition than of  
35  
36  
37 194 overnutrition. These target groups may develop more severe forms of malnutrition if corrective  
38  
39 195 measures are delayed. The first step in that direction is to plan face-to-face counseling sessions  
40  
41 196 with parents and children. School programs are effective at preventing childhood obesity by  
42  
43 197 fostering more physical activities and recommending healthier diets [18]. Counseling for the  
44  
45  
46 198 target groups will have to be done, keeping in mind that within low-resource settings, places for  
47  
48 199 play may be scarce, sports infrastructure may be poor, and recreational centers may be lacking  
49  
50 200 [19]. Similarly, low family income is linked to greater consumption of low-quality nutrition and  
51  
52  
53 201 fast food [20].

1  
2  
3 202           Importantly, MUAC as a single tool can facilitate this cohesive intervention by detecting  
4  
5 203 both under and over-nutrition during routine growth monitoring without a height-dependent  
6  
7 204 parameter, such as BMI (Figure1). This is because BMI and MUAC are significantly correlated  
8  
9  
10 205 with each other. However, monitoring for obesity should begin even earlier, as the most rapid  
11  
12 206 weight gain occurs between ages 2 and 6 years among obese adolescents [21].  
13  
14  
15

16 207           While India's economy has been growing at an impressive rate, the country still has the  
17  
18 208 highest number of stunted children in the world (46.8 million), representing one-third of the  
19  
20 209 global total of stunted children under age 5 [22]. Stunting is associated with being overweight  
21  
22 210 among children in countries that are undergoing a nutritional transition [23]. Economic  
23  
24 211 improvements are accompanied by a conspicuous change in dietary patterns in the form of  
25  
26 212 increased fat intake [5]. This, coupled with low physical activity, contributes to an increasing  
27  
28 213 prevalence of obesity among adults, which accompanies the first wave of a cluster of non-  
29  
30 214 communicable diseases, such as hypertension and diabetes mellitus, called "the new world  
31  
32 215 syndrome" [24].  
33  
34  
35  
36  
37

38 216           It should be noted, however, that some children classified as obese under this system may  
39  
40 217 actually have a higher relative weight due to stunting rather than excess adiposity. Moreover,  
41  
42 218 classification of a child's or adolescent's weight status is complicated by the fact that height and  
43  
44 219 body composition are continually changing, and such changes often occur at different rates and  
45  
46 220 times within different populations. Charts showing BMI for healthy children by age indicate an  
47  
48 221 initial rapid rise in the first year, a subsequent decline for the next 5 years, and then a slow rise  
49  
50  
51 222 into adulthood, making simple universal adiposity indices of little value. Therefore, there has not  
52  
53  
54  
55  
56  
57  
58  
59  
60

1  
2  
3 223 been the same level of agreement on the classification of obesity for children and adolescents as  
4  
5 224 there is for adults [25].  
6  
7  
8

9 225 To summarize, until recently, India has considered under-nutrition to be a major problem,  
10  
11 226 and nutrition supplementation has been the key intervention. At the national level, India is at  
12  
13 227 stage 1 of the obesity transition with wide sub-national variations [26]. Our study may help in the  
14  
15 228 surveillance effort to address underserved populations [26]. With improved availability of food, a  
16  
17 229 double burden of malnutrition is emerging that needs to be concurrently addressed. The present  
18  
19 230 study observed the coexistence of obesity, overweight, pre-obese, and SAM, MAM, and  
20  
21 231 undernourished states among Indian school children in lower-middle and lower socioeconomic  
22  
23 232 levels. Second, the present results revealed a significant correlation between BMI and MUAC.  
24  
25 233 This study provides evidence to suggest that MUAC is a valid, single measurement for  
26  
27 234 identifying this dual problem of aberrant growth and over-nutrition on the one hand and under-  
28  
29 235 nutrition on the other, through extended routine growth monitoring of children. However, more  
30  
31 236 studies are required to establish validity and reliability of this tool.  
32  
33  
34  
35  
36  
37  
38  
39  
40  
41  
42  
43  
44  
45  
46  
47  
48  
49  
50  
51  
52  
53  
54  
55  
56  
57  
58  
59  
60

1  
2  
3 237 **What is known about the subject?**  
4

5 238 • Emerging economies face a dual problem of under-nutrition and over-nutrition.

6  
7  
8 239 • Detecting this problem using height-based parameters is not easy in a low-resource  
9  
10 240 setting.

11  
12 241 **What this study adds?**  
13

14  
15 242 This study suggests that MUAC is a simple, valid, and single measure for identifying this dual  
16  
17 243 problem in a low-resource setting.  
18

19 244  
20  
21 245 **Funding statement:** This research received no specific grant from any funding agency in public,  
22  
23 246 commercial, or not-for-profit sectors.  
24  
25

26  
27 247 **Declaration of interests:** All authors have completed the ICMJE uniform disclosure form at and  
28  
29 248 confirm no support from any organization for the submitted work; no financial relationships with  
30  
31 249 any organizations that might have an interest in the submitted work in the previous three years;  
32  
33 250 no other relationships or activities that could appear to have influenced the submitted work.  
34  
35

36  
37  
38 251

39  
40 252 **Author contributions**  
41

42 253 **SD-Conceptualization; Data analysis; Manuscript writing.**  
43

44  
45 254 SM-Data collection; data analysis; manuscript writing.  
46

47  
48 255 AK- Data analysis; manuscript writing.  
49

50 256 ED- Data collection; manuscript writing.  
51

52  
53 257  
54  
55  
56  
57  
58  
59  
60

**258 References**

- 259 1. Nestle M. Rethinking nutritional policies in developing countries taking into account the  
260 double burden of malnutrition.2016 Oct 18 [Cited 2016 Oct 18]. In: Ideas4Development Blog  
261 [Internet]. Available from: <https://ideas4development.org/en/rethinking-nutritional-policies>
- 262 2. Shrimpton R, Rokx C. Health, nutrition, and population (HNP) discussion paper: The double  
263 burden of malnutrition: a review of global evidence. 2012. [cited 12 Aug 2002].  
264 [Internet]. Washington (DC): The World Bank. Available from:  
265 [http://documents.worldbank.org/curated/en/905651468339879888/The-double-burden-of-](http://documents.worldbank.org/curated/en/905651468339879888/The-double-burden-of-malnutrition-a-review-of-global-evidence)  
266 [malnutrition-a-review-of](http://documents.worldbank.org/curated/en/905651468339879888/The-double-burden-of-malnutrition-a-review-of-global-evidence) global evidence.
- 267 3. Prentice AM. The double burden of malnutrition in countries passing through the economic  
268 transition. *Ann Nutr Metab.* 2018; 72(suppl 3):47–54.doi: 10.1159/000487383.
- 269 4. Dinsa GD, Goryakin Y, Fumagalli E, Suhrcke M. Obesity and socioeconomic status in  
270 developing countries: a systematic review. *Obes Rev.* 2012; 13(11):1067–1079. doi:  
271 10.1111/j.1467-789X.2012.01017.5. Kennedy G, Nantel G, Shetty P. Assessment of the double  
272 burden of malnutrition in six case study countries. In: *The double burden of malnutrition: Case*  
273 *studies from six developing countries.* Rome, Italy: Food and Agriculture Organization of the  
274 United Nations; 2006.pp. 1–18.
- 275 6. Ketal K. Two decades of annual medical examinations in Japanese obese children: do obese  
276 children grow into obese adults? *Int J Obes Relat Metab Disord.* 1997; 21:912–921. 7. de Wilde  
277 JA, van Dommelen P, Middelkoop BJ. Appropriate body mass index cut-offs to determine  
278 thinness, overweight and obesity in south Asian children in the Netherlands. *PLoS One.* 2013;  
279 8(12): e82822.doi:10.1371/journal.pone.0082822.

- 1  
2  
3 280 8. World Health Organization Expert Consultation. Appropriate body-mass index for Asian  
4  
5 281 populations and its implications for policy and intervention strategies. *Lancet*. 2004;363:157–  
6  
7 282 163. doi: 10.1016/S0140-6736(03)15268-3  
8  
9  
10  
11 283 9. Liu A, Hills AP, Hu X, Li Y, Du L, Xu Y, et al. Waist circumference cut-off values for the  
12  
13 284 prediction of cardiovascular risk factors clustering in Chinese school-aged children: a cross-  
14  
15 285 sectional study. *BMC Public Health*. 2010; 10:82. doi: 10.1186/1471-2458-10-82  
16  
17  
18 286 10. Craig E, Bland R, Ndirangu J, Reilly JJ. Use of mid-upper arm circumference for  
19  
20 287 determining overweight and overfatness in children and adolescents. *Arch Dis Child*. 2014;  
21  
22 288 99:763–766. doi: 10.1136/archdischild-2013-305137 763. 11. Chaput JP, Katzmarzyk PT, Barnes  
23  
24 289 JD, Fogelholm M, Hu G, Kuriyan R, et al. Mid-upper arm circumference as a screening tool for  
25  
26 290 identifying children with obesity: a 12-country study. *Pediatr Obes*. 2017; 12(6):439–445. doi:  
27  
28 291 10.1111/ijpo.12162.  
29  
30  
31  
32  
33 292 12. Asif M, Aslam M, Altaf S. Mid-upper-arm circumference as a screening measure for  
34  
35 293 identifying children with elevated body mass index: a study for Pakistan. *Korean J*  
36  
37 294 *Pediatr*. 2018;61(1):6–11. doi: 10.3345/kjp.2018.61.1.6  
38  
39  
40  
41 295 13. Jaiswal M, Bansal R, Agarwal A. Role of mid-upper arm circumference for determining  
42  
43 296 overweight and obesity in children and adolescents. *J Clin Diagn Res*. 2017; 11(8):SC05–  
44  
45 297 SC08. doi: 10.7860/JCDR/2017/27442.10422  
46  
47  
48 298 14. Lu Q, Wang R, Lou DH, Ma CM, Liu XL, Yin FZ. Mid-upper-arm circumference and arm-  
49  
50 299 to-height ratio in evaluation of overweight and obesity in Han  
51  
52 300 children. *Pediatr Neonatol*. 2014;55:14–19. doi: 10.1016/j.pedneo.2013.05.004.  
53  
54  
55  
56  
57  
58  
59  
60



- 1  
2  
3 301 15. Talma H, van Dommelen P, Schweizer JJ, Bakker B, Kist-van Holthe JE, Chinpaw JMM, et  
4  
5 302 al. Is mid-upper arm circumference in Dutch children useful in identifying obesity? Arch Dis  
6  
7 303 Child. 2019; 104(2):159–165. doi: 10.1136/archdischild-2017-313528.  
8  
9  
10  
11 304 16. Roberfroid D, Hammami N, Lachat C, Weise Prinzo Z, Sibson V, Guesdon B, et al.  
12  
13 305 Utilization of mid-upper arm circumference versus weight-for-height in nutritional rehabilitation  
14  
15 306 programmes: A systematic review of evidence. Geneva, Switzerland: World Health  
16  
17 307 Organization; 2013.  
18  
19  
20  
21 308 17. WHO Multicentre Growth Reference Study Group. WHO child growth standards based on  
22  
23 309 length/height, weight and age. Acta Paediatr. 2006; 450(Suppl.):76–85.  
24  
25  
26 310 18. Veugelers PJ, Fitzgerald AL. Effectiveness of school programs in preventing childhood  
27  
28 311 obesity: a multilevel comparison. Am J Pub Health. 2005; 95(3):432–435. doi:  
29  
30 312 10.2105/AJPH.2004.045898  
31  
32  
33  
34 313 19. Ludwig J, Sanbonmatsu L, Gennetian L, Adam E, Duncan GJ, Katz LF, et al.  
35  
36 314 Neighborhoods, obesity, and diabetes—a randomized social experiment. N Engl J  
37  
38 315 Med. 2011; 365:1509–1519. doi: 10.1056/NEJMsa1103216  
39  
40  
41  
42 316 20. Zenk SN, Powell LM, Rimkus L, Isgor Z, Barker DC, Ohri-Vachaspati P, Chaloupka F.  
43  
44 317 Relative and absolute availability of healthier food and beverage alternatives across communities  
45  
46 318 in the United States. Am J Pub Health. 2014; 104(11):2170–2178. doi:  
47  
48 319 10.2105/AJPH.2014.302113  
49  
50  
51  
52  
53  
54  
55  
56  
57  
58  
59  
60

- 1  
2  
3 320 21. Geserick M, Vogel M, Gausche R, Lipek T, Spielau U, Keller E, et al. Acceleration of BMI in  
4  
5 321 early childhood and risk of sustained obesity. *N Engl J Med*. 2018; 379:1303–1312. doi:  
6  
7 322 10.1056/NEJMoa1803527  
8  
9  
10 323 22. UNICEF India. Stunting. December 2018. [Internet]. New Delhi, India: UNICEF. Available  
11  
12 324 from: <http://unicef.in/Whatwedo/10/Stunting>.  
13  
14  
15  
16 325 23, Popkin BM, Richards MK, Monteiro CA. Stunting is associated with overweight in children  
17  
18 326 in countries that are undergoing the nutrition transition. *J Nutr*. 1996; 126(12):3009–3016. doi:  
19  
20 327 10.1093/jn/126.12.3009.  
21  
22  
23  
24 328 24. Kolčić I. Double burden of malnutrition: a silent driver of double burden of disease in low-  
25  
26 329 and middle-income countries. *J Glob Health*. 2012; 2(2):020303. doi: 10.7189/jogh.02.020303.  
27  
28  
29 330 25. Chan RSM, Woo J. Prevention of overweight and obesity: how effective is the current public  
30  
31 331 health approach. *Int J Environ Res Public Health*. 2010; 7(3):765–783.  
32  
33 332 doi:10.3390/ijerph703076526  
34  
35  
36  
37 333 26. Jaacks LM, Vandevijvere S, Pan A, McGowan CJ, Wallace C, Imamura F, et al. The obesity  
38  
39 334 transition: stages of the global epidemic. *Lancet Diabetes*  
40  
41 335 *Endocrinol*. 2019. [http://dx.doi.org/10.1016/S2213-8587\(19\)30026-9](http://dx.doi.org/10.1016/S2213-8587(19)30026-9).  
42  
43  
44  
45  
46  
47  
48  
49  
50  
51  
52  
53  
54  
55  
56  
57  
58  
59  
60

336

337

338 **Table 1**339 Comparison of various variables between girls and boys  
340

| Variables ^             | Girls (n=424) |       |        |       | Boys (n=1020) |       |        |       | Mann-Whitney Test |                   |
|-------------------------|---------------|-------|--------|-------|---------------|-------|--------|-------|-------------------|-------------------|
|                         | Mean          | SD    | Median | IQR   | Mean          | SD    | Median | IQR   | Z-value           | p-value           |
| <b>Age (years)</b>      | 7.63          | 2.82  | 7.00   | 5.00  | 8.80          | 3.69  | 9.00   | 5.00  | -5.162            | <b>2.44E-07 *</b> |
| <b>Height (cm)</b>      | 125.16        | 16.95 | 125.00 | 26.00 | 134.06        | 22.16 | 133.15 | 34.00 | -6.626            | <b>3.44E-11 *</b> |
| <b>Body weight (Kg)</b> | 22.48         | 8.83  | 20.20  | 10.40 | 28.93         | 14.96 | 24.20  | 19.40 | -7.215            | <b>5.41E-13 *</b> |
| <b>BMI</b>              | 13.84         | 2.33  | 13.20  | 2.14  | 15.04         | 3.31  | 13.98  | 3.24  | -7.374            | <b>1.66E-13 *</b> |
| <b>MUAC</b>             | 17.52         | 2.61  | 16.85  | 3.30  | 18.94         | 3.83  | 17.95  | 5.00  | -6.233            | <b>4.59E-10 *</b> |

341 ^ All Data failed 'Normality Test'. Hence Mann-Whitney U Rank Sum Test applied.

342 \*Difference is statistically significant.

343 BMI=Body Mass Index; MUAC=Mid-upper-arm circumference

344 **Table 2**  
 345 Distribution of variables among all Subjects  
 346

| Variables        | Mean   | SD    | Median | IQR   | Minimum | Maximum |
|------------------|--------|-------|--------|-------|---------|---------|
| Age (years)      | 8.46   | 3.50  | 9.00   | 6.00  | 3.00    | 16.00   |
| Body weight (Kg) | 27.04  | 13.77 | 23.10  | 16.20 | 9.00    | 97.50   |
| Height (cm)      | 131.45 | 21.16 | 130.00 | 32.00 | 84.00   | 188.00  |
| Height (meters)  | 1.31   | 0.21  | 1.30   | 0.32  | 0.84    | 1.88    |
| BMI              | 14.69  | 3.10  | 13.78  | 2.89  | 6.58    | 36.10   |
| MAC              | 18.53  | 3.57  | 17.50  | 4.30  | 12.20   | 35.00   |

347 SD = standard deviation; IQR = inter-quartile range; BMI = Body Mass Index; MUAC =Mid-upper-arm  
 348 circumference

349 **Table 3**  
 350 Correlations between anthropometric parameters among girls (N=424)  
 351

| Variables               |                     | MUAC      | Body weight (Kg) | Height (cm) | BMI       |
|-------------------------|---------------------|-----------|------------------|-------------|-----------|
| <b>MUAC</b>             | Pearson Correlation | 1         | .897(**)         | .700(**)    | .826(**)  |
|                         | p-value             |           | 7.34E-152        | 1.21E-63    | 6.86E-107 |
| <b>Body weight (Kg)</b> | Pearson Correlation | .897(**)  | 1                | .866(**)    | .776(**)  |
|                         | p-value             | 7.34E-152 |                  | 2.85E-129   | 1.93E-86  |
| <b>Height (cm)</b>      | Pearson Correlation | .700(**)  | .866(**)         | 1           | .385(**)  |
|                         | p-value             | 1.21E-63  | 2.85E-129        |             | 2.16E-16  |
| <b>BMI</b>              | Pearson Correlation | .826(**)  | .776(**)         | .385(**)    | 1         |
|                         | p-value             | 6.86E-107 | 1.93E-86         | 2.16E-16    |           |

352 \*\* Correlation is significant at the 0.01 level (2-tailed).  
 353

354 **Table 4**  
 355 Correlations between anthropometric parameters among boys (N=1020)  
 356

| Variables               |                     | MUAC      | Body weight (Kg) | Height (cm) | BMI       |
|-------------------------|---------------------|-----------|------------------|-------------|-----------|
| <b>MUAC</b>             | Pearson Correlation | 1         | .911(**)         | .780(**)    | .847(**)  |
|                         | p-value             |           | 0.0001           | 9.60E-210   | 2.21E-281 |
| <b>Body weight (Kg)</b> | Pearson Correlation | .911(**)  | 1                | .886(**)    | .861(**)  |
|                         | p-value             | 0.0001    |                  | 0.0001      | 1.25E-301 |
| <b>Height (cm)</b>      | Pearson Correlation | .780(**)  | .886(**)         | 1           | .564(**)  |
|                         | p-value             | 9.60E-210 | 0.0001           |             | 1.02E-86  |
| <b>BMI</b>              | Pearson Correlation | .847(**)  | .861(**)         | .564(**)    | 1         |
|                         | p-value             | 2.21E-281 | 1.25E-301        | 1.02E-86    |           |

357 \*\* Correlation is significant at the 0.01 level (2-tailed).

358 **Table 5**  
 359 Distribution of BMI Z-scores  
 360

| <b>BMI (Z Score) Internal</b> | <b>No.</b> | <b>Percentage</b> |
|-------------------------------|------------|-------------------|
| >+3                           | 21         | 1.5%              |
| >+2 to <+3                    | 36         | 2.5%              |
| >+1 to <+2                    | 136        | 9.4%              |
| 0 to +1                       | 391        | 27.1%             |
| >=-1 to 0                     | 709        | 49.1%             |
| >=-2 to <-1                   | 141        | 9.8%              |
| >= -3 to <-2                  | 5          | 0.3%              |
| <-3                           | 5          | 0.3%              |
| <b>Total</b>                  | 1444       | 100.0%            |

361 BMI=Body Mass Index

362 **Table 6**  
 363 Distribution of MUAC Z-scores  
 364

| MAC (Z Score) Internal | No.  | Percentage |
|------------------------|------|------------|
| >+3 SD                 | 19   | 1.3%       |
| >+2 to <+3             | 43   | 3.0%       |
| >+1 to <+2             | 135  | 9.3%       |
| 0 to +1                | 418  | 28.9%      |
| >=-1 to 0              | 641  | 44.4%      |
| >=-2 to <-1            | 181  | 12.5%      |
| >= -3 to <-2           | 6    | 0.4%       |
| <-3                    | 1    | 0.1%       |
| <b>Total</b>           | 1444 | 100.0%     |

MUAC=Mid-upper-arm circumference

365  
 366  
 367  
 368  
 369  
 370  
 371  
 372  
 373  
 374  
 375  
 376  
 377  
 378  
 379  
 380  
 381  
 382  
 383  
 384  
 385  
 386  
 387  
 388  
 389  
 390  
 391  
 392  
 393



394 **Table 7**  
 395 Distribution of nutrition conditions based on BMI and MUAC Z-scores \*\*  
 396

| Condition                               | Based on BMI z-scores<br>No (%) | Based on MUACZ-scores<br>No (%)  |
|-----------------------------------------|---------------------------------|----------------------------------|
| <b>Pre-obese</b>                        | BMI >1 to 2 SD<br>136 (9.4%)    | MUAC >1 to 2SD<br>135 (9.3%)     |
| <b>Overweight</b>                       | BMI >2 to 3 SD<br>36 (2.5%)     | MUAC >2 to 3SD<br>43 (3.0%)      |
| <b>Obese</b>                            | BMI >3SD<br>21 (1.5%)           | MUAC >3SD<br>19(1.3%)            |
| <b>Possible risk of<br/>underweight</b> | BMI <-1 to -2 SD<br>141 (9.8%)  | MUAC ≤ -1 to -2SD<br>181 (12.5%) |
| <b>Thin</b>                             | BMI <-2 to -3 SD<br>5 (0.3%)    | MUAC <-2 to -3SD<br>6 (0.4%)     |
| <b>Severely thin</b>                    | BMI <-3SD<br>5 (0.3%)           | MUAC <-3 SD<br>1(0.1%)           |

397 \*\*Modified WHO Classification of nutrition conditions based on anthropometry  
 398 BMI = Body Mass Index; MUAC = Mid-upper-arm circumference

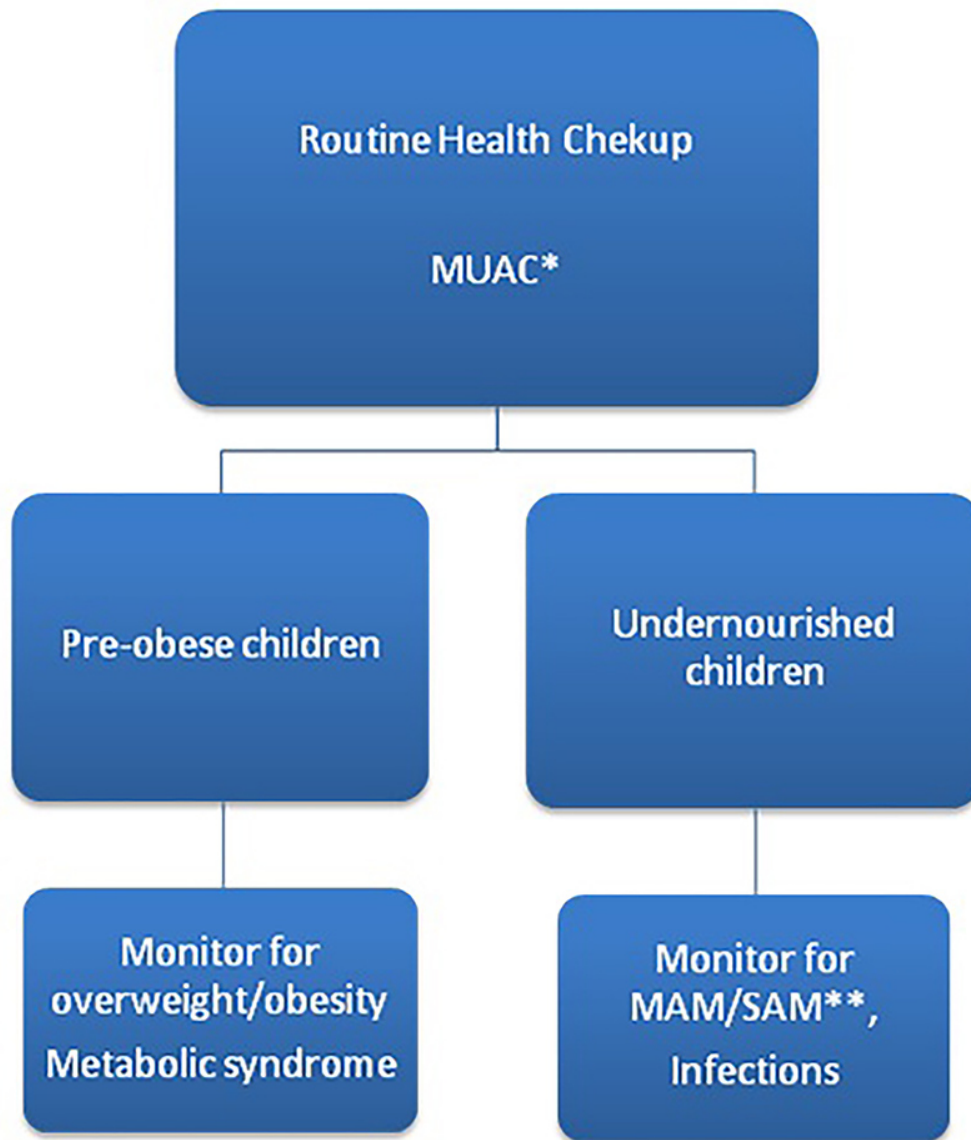

282x327mm (72 x 72 DPI)

1  
2  
3  
4  
5  
6  
7  
8  
9  
10  
11  
12  
13  
14  
15  
16  
17  
18  
19  
20  
21  
22  
23  
24  
25  
26  
27  
28  
29  
30  
31  
32  
33  
34  
35  
36  
37  
38  
39  
40  
41  
42  
43  
44  
45  
46  
47  
48  
49  
50  
51  
52  
53  
54  
55  
56  
57  
58  
59  
60

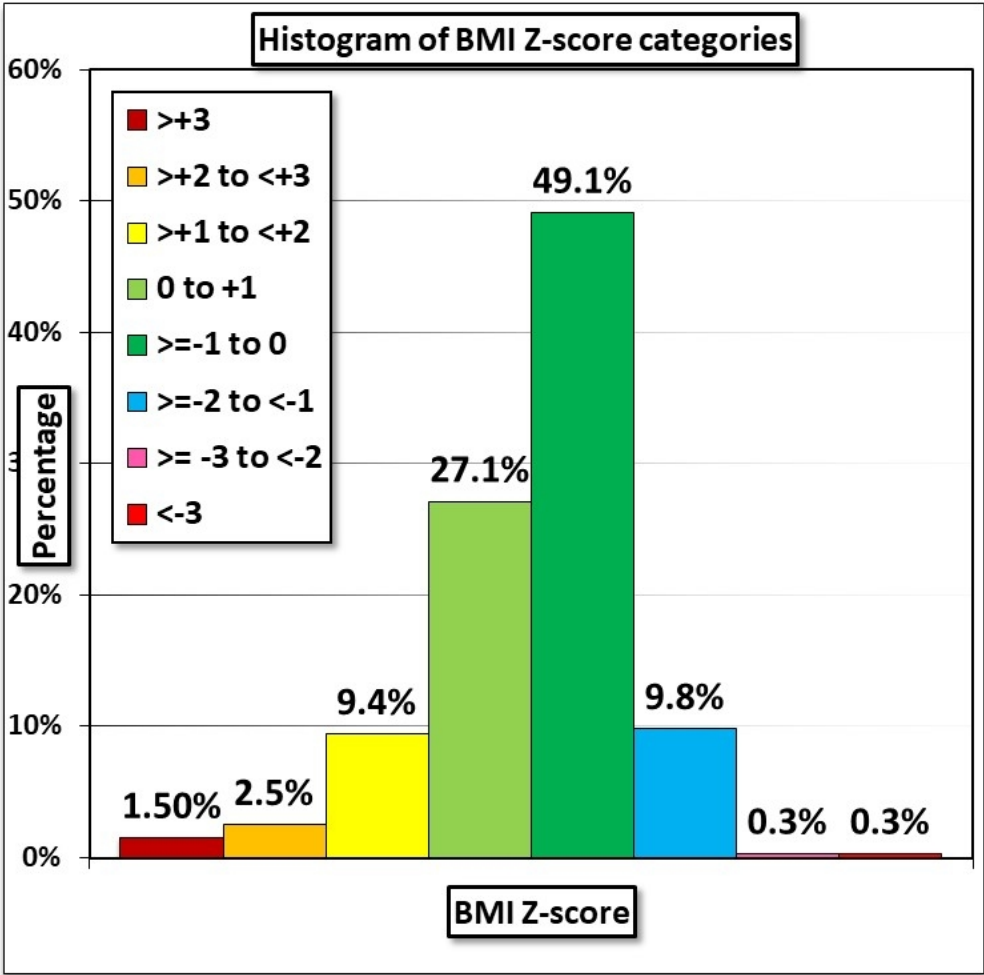

158x157mm (120 x 120 DPI)

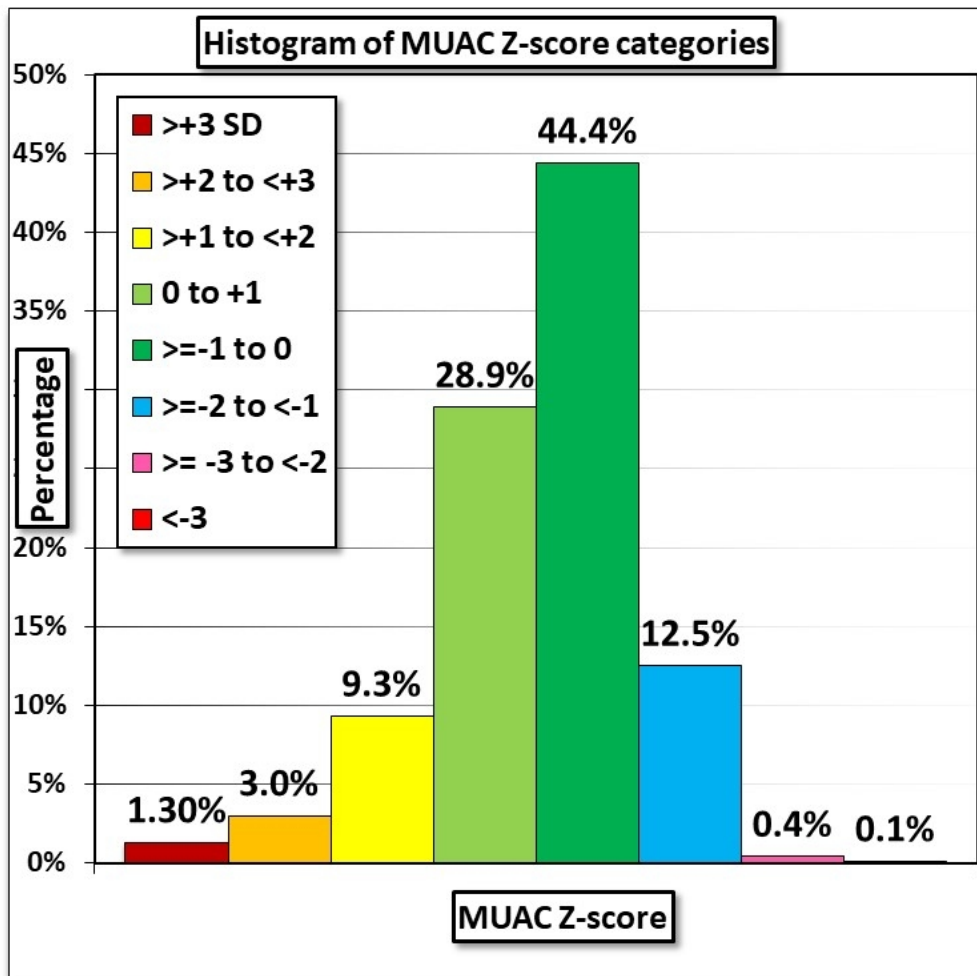

158x157mm (120 x 120 DPI)

**Table 8**  
**Age-wise distribution of BMI among all Subjects**

| Age (years) | BMI   |      |        |       |
|-------------|-------|------|--------|-------|
|             | Mean  | SD   | Median | IQR   |
| <b>3</b>    | 13.37 | 1.34 | 13.26  | 1.61  |
| <b>4</b>    | 13.04 | 1.69 | 13.07  | 1.46  |
| <b>5</b>    | 13.01 | 1.13 | 12.80  | 1.02  |
| <b>6</b>    | 13.85 | 2.09 | 13.39  | 1.55  |
| <b>7</b>    | 13.54 | 1.48 | 13.20  | 1.90  |
| <b>8</b>    | 13.94 | 2.22 | 13.37  | 2.01  |
| <b>9</b>    | 13.70 | 1.73 | 13.36  | 1.66  |
| <b>10</b>   | 14.74 | 2.84 | 13.97  | 2.77  |
| <b>11</b>   | 15.48 | 3.03 | 14.89  | 3.60  |
| <b>12</b>   | 15.89 | 3.01 | 15.63  | 3.87  |
| <b>13</b>   | 18.22 | 3.34 | 17.51  | 3.30  |
| <b>14</b>   | 18.33 | 3.88 | 17.28  | 4.53  |
| <b>15</b>   | 19.09 | 4.32 | 18.01  | 6.52  |
| <b>16</b>   | 21.38 | 5.89 | 23.55  | 11.09 |

SD = standard deviation; IQR = inter-quartile range

**Table 9**  
**Homogeneous Subsets: BMI: Tukey HSD**

| Age (years) | No. | Subset for alpha = 0.05 |        |        |        |        |        |
|-------------|-----|-------------------------|--------|--------|--------|--------|--------|
|             |     | 1                       | 2      | 3      | 4      | 5      | 6      |
| 5           | 132 | 13.011                  |        |        |        |        |        |
| 4           | 146 | 13.038                  |        |        |        |        |        |
| 3           | 102 | 13.366                  | 13.366 |        |        |        |        |
| 7           | 156 | 13.537                  | 13.537 |        |        |        |        |
| 9           | 72  | 13.696                  | 13.696 |        |        |        |        |
| 6           | 109 | 13.852                  | 13.852 | 13.852 |        |        |        |
| 8           | 65  | 13.939                  | 13.939 | 13.939 |        |        |        |
| 10          | 220 |                         | 14.740 | 14.740 | 14.740 |        |        |
| 11          | 182 |                         |        | 15.481 | 15.481 |        |        |
| 12          | 77  |                         |        |        | 15.892 |        |        |
| 13          | 30  |                         |        |        |        | 18.224 |        |
| 14          | 72  |                         |        |        |        | 18.325 |        |
| 15          | 72  |                         |        |        |        | 19.094 |        |
| 16          | 9   |                         |        |        |        |        | 21.380 |
| <b>Sig.</b> |     | 0.836                   | 0.232  | 0.059  | 0.529  | 0.892  | 1.000  |

Means for groups in homogeneous subsets are displayed.

BMI = Body Mass Index

**Table 10**  
**Age-wise distribution of MUAC among all Subjects**

| Age (years) | MUAC  |      |        |      |
|-------------|-------|------|--------|------|
|             | Mean  | SD   | Median | IQR  |
| <b>3</b>    | 15.39 | 1.24 | 15.20  | 1.50 |
| <b>4</b>    | 15.50 | 1.16 | 15.50  | 1.10 |
| <b>5</b>    | 16.19 | 1.17 | 15.95  | 1.20 |
| <b>6</b>    | 16.83 | 2.07 | 16.50  | 1.95 |
| <b>7</b>    | 16.98 | 1.75 | 16.70  | 2.00 |
| <b>8</b>    | 17.97 | 2.11 | 17.50  | 1.61 |
| <b>9</b>    | 17.79 | 1.78 | 17.50  | 2.08 |
| <b>10</b>   | 19.02 | 2.63 | 18.50  | 3.45 |
| <b>11</b>   | 20.16 | 3.04 | 19.50  | 3.93 |
| <b>12</b>   | 20.87 | 2.79 | 20.50  | 4.00 |
| <b>13</b>   | 22.91 | 2.79 | 22.50  | 2.60 |
| <b>14</b>   | 23.53 | 3.64 | 23.00  | 4.95 |
| <b>15</b>   | 24.66 | 3.73 | 23.50  | 5.23 |
| <b>16</b>   | 25.81 | 4.63 | 27.20  | 7.75 |

SD = standard deviation; IQR = inter-quartile range

Table 11

## Homogeneous Subsets: MUAC: Tukey HSD (Table No. 4)

| Age (years) | No. | Subset for alpha = 0.05 |        |        |        |        |        |        |        |        |
|-------------|-----|-------------------------|--------|--------|--------|--------|--------|--------|--------|--------|
|             |     | 1                       | 2      | 3      | 4      | 5      | 6      | 7      | 8      | 9      |
| 3           | 102 | 15.385                  |        |        |        |        |        |        |        |        |
| 4           | 146 | 15.500                  | 15.500 |        |        |        |        |        |        |        |
| 5           | 132 | 16.194                  | 16.194 |        |        |        |        |        |        |        |
| 6           | 109 | 16.826                  | 16.826 | 16.826 |        |        |        |        |        |        |
| 7           | 156 |                         | 16.979 | 16.979 |        |        |        |        |        |        |
| 9           | 72  |                         |        | 17.794 | 17.794 |        |        |        |        |        |
| 8           | 65  |                         |        | 17.972 | 17.972 |        |        |        |        |        |
| 10          | 220 |                         |        |        | 19.015 | 19.015 |        |        |        |        |
| 11          | 182 |                         |        |        |        | 20.161 | 20.161 |        |        |        |
| 12          | 77  |                         |        |        |        |        | 20.871 |        |        |        |
| 13          | 30  |                         |        |        |        |        |        | 22.907 |        |        |
| 14          | 72  |                         |        |        |        |        |        | 23.532 | 23.532 |        |
| 15          | 72  |                         |        |        |        |        |        |        | 24.658 | 24.658 |
| 16          | 9   |                         |        |        |        |        |        |        |        | 25.811 |
| <b>Sig.</b> |     | 0.102                   | 0.08   | 0.421  | 0.314  | 0.423  | 0.961  | 0.987  | 0.452  | 0.412  |

Means for groups in homogeneous subsets are displayed.

MUAC = Mid-upper-arm circumference



**Table 12**  
**Association among the cases between BMI (Z-Score) Internal and Gender**

| BMI (Z Score) Internal |     | Gender |        | Total  |
|------------------------|-----|--------|--------|--------|
|                        |     | Female | Male   |        |
| >+3                    | No. | 5      | 16     | 21     |
|                        | %   | 1.2%   | 1.6%   | 1.5%   |
| >+2 to <+3             | No. | 11     | 25     | 36     |
|                        | %   | 2.6%   | 2.5%   | 2.5%   |
| >+1 to <+2             | No. | 47     | 89     | 136    |
|                        | %   | 11.1%  | 8.7%   | 9.4%   |
| 0 to +1 ^              | No. | 109    | 282    | 391    |
|                        | %   | 25.7%  | 27.6%  | 27.1%  |
| >=-1 to 0 ^            | No. | 209    | 500    | 709    |
|                        | %   | 49.3%  | 49.0%  | 49.1%  |
| >=-2 to <-1 ^          | No. | 39     | 102    | 141    |
|                        | %   | 9.2%   | 10.0%  | 9.8%   |
| >= -3 to <-2 ^         | No. | 3      | 2      | 5      |
|                        | %   | 0.7%   | 0.2%   | 0.3%   |
| <-3 ^                  | No. | 1      | 4      | 5      |
|                        | %   | 0.2%   | 0.4%   | 0.3%   |
| Total                  | No. | 424    | 1020   | 1444   |
|                        | %   | 100.0% | 100.0% | 100.0% |

| Chi-Square Test       | Value | df | p-value | Association is- |
|-----------------------|-------|----|---------|-----------------|
| Pearson Chi-Square \$ | 5.199 | 7  | 0.636   | Not significant |
| Pearson Chi-Square ^  | 2.262 | 3  | 0.520   | Not significant |

\$ 4 cells (25.0%) have expected count less than 5. ^ Row data pooled and Chi-Square test reapplied.

BMI = Body Mass Index

**Table 13**  
**Association among the cases between MUAC (Z-Score) Internal and Gender**

| MUAC (Z Score) Internal |     | Gender |        | Total  |
|-------------------------|-----|--------|--------|--------|
|                         |     | Female | Male   |        |
| >+3 SD                  | No. | 3      | 16     | 19     |
|                         | %   | 0.7%   | 1.6%   | 1.3%   |
| >+2 to <+3              | No. | 17     | 26     | 43     |
|                         | %   | 4.0%   | 2.5%   | 3.0%   |
| >+1 to <+2              | No. | 38     | 97     | 135    |
|                         | %   | 9.0%   | 9.5%   | 9.3%   |
| 0 to +1 ^               | No. | 131    | 287    | 418    |
|                         | %   | 30.9%  | 28.1%  | 28.9%  |
| >=-1 to 0 ^             | No. | 178    | 463    | 641    |
|                         | %   | 42.0%  | 45.4%  | 44.4%  |
| >=-2 to <-1 ^           | No. | 55     | 126    | 181    |
|                         | %   | 13.0%  | 12.4%  | 12.5%  |
| >= -3 to <-2 ^          | No. | 2      | 4      | 6      |
|                         | %   | 0.5%   | 0.4%   | 0.4%   |
| <-3 ^                   | No. | 0      | 1      | 1      |
|                         | %   | 0.0%   | 0.1%   | 0.1%   |
| Total                   | No. | 424    | 1020   | 1444   |
|                         | %   | 100.0% | 100.0% | 100.0% |

| Chi-Square Test       | Value | df | p-value | Association is- |
|-----------------------|-------|----|---------|-----------------|
| Pearson Chi-Square \$ | 6.054 | 7  | 0.533   | Not significant |
| Pearson Chi-Square ^  | 3.929 | 3  | 0.269   | Not significant |

\$ 4 cells (25.0%) have expected count less than 5. ^ Row data pooled and Chi-Square test reapplied.

MUAC = Mid-upper-arm circumference

# BMJ Paediatrics Open

## **Double burden of malnutrition among Indian school children and its measurement: A cross-sectional study in a single school**

**Short title: Measuring double burden of malnutrition**

|                               |                                                                                                                                                                                                                                           |
|-------------------------------|-------------------------------------------------------------------------------------------------------------------------------------------------------------------------------------------------------------------------------------------|
| Journal:                      | <i>BMJ Paediatrics Open</i>                                                                                                                                                                                                               |
| Manuscript ID                 | bmjpo-2019-000505.R2                                                                                                                                                                                                                      |
| Article Type:                 | Original research                                                                                                                                                                                                                         |
| Date Submitted by the Author: | 20-Sep-2019                                                                                                                                                                                                                               |
| Complete List of Authors:     | Daga, Subhashchandra; Pacific Medical College and Hospital, Pediatrics Mhatre, Sameer; Smt Kashibai Navale Medical College and General Hospital, Paediatrics<br>Kasbe, Abhiram ; Topiwala National Medical College<br>DSouza, Eric; MIMER |
| Keywords:                     | General Paediatrics, Obesity, School Health, Tropical Paediatrics, Growth                                                                                                                                                                 |
|                               |                                                                                                                                                                                                                                           |

SCHOLARONE™  
Manuscripts

1  
2  
3 1  
4  
5  
6  
7 2  
8  
9  
10  
11 3  
12  
13  
14  
15 4 Double burden of malnutrition among Indian school children and its  
16  
17  
18 5 measurement: A cross-sectional study in a single school  
19  
20  
21

22 6 Short title: Measuring double burden of malnutrition  
23  
24  
25 7  
26  
27

28 8  
29  
30  
31 9 SubhashchandraDaga<sup>1\*</sup>, Sameer Mhatre<sup>2</sup>, Eric Dsouza<sup>3</sup>, Abhiram Kasbe<sup>4</sup>  
32  
33

34 10  
35  
36  
37 11 <sup>1</sup>Department of Pediatrics,  
38  
39  
40 12 Pacific Medical College and Hospital, Udaipur, India  
41  
42

43 13 <sup>2</sup>Department of Pediatrics,  
44  
45  
46 14 Smt. KashibaiNavle Medical College, Pune, India  
47  
48  
49

50 15 <sup>3</sup> Department of Pediatrics,  
51  
52  
53 16 MIMER Medical College, Talegaon, India  
54  
55  
56  
57  
58  
59  
60

1  
2  
3 17 <sup>4</sup>Department of Pediatrics,  
4

5  
6 18 Topiwala Medical College, Mumbai, India  
7  
8

9 19

10 20

11  
12  
13  
14  
15 21 \*Corresponding author  
16  
17

18 22 E-mail: [dagasubhash49@gmail.com](mailto:dagasubhash49@gmail.com) (SD)  
19  
20

21 23 Tel: +91-9960522259  
22  
23  
24

25 24  
26  
27

28  
29 25  
30  
31

32  
33 26  
34  
35  
36  
37

38 27  
39  
40  
41

42 28  
43  
44  
45

46 29  
47  
48  
49

50 30  
51  
52  
53

54 31  
55  
56  
57  
58  
59  
60

1  
2  
3  
4 32  
5  
6  
78 **Abstract**  
910  
11  
12  
13 **Objective**  
14

15 35 This cross-sectional study **in a single school** aimed to document the extent of double burden of  
16  
17 36 malnutrition (coexistence of over- and under-nutrition) among Indian schoolchildren from lower  
18  
19 37 socioeconomic groups, and to determine if mid-upper arm circumference (MUAC) can be used  
20  
21  
22 38 as a proxy for body mass index (BMI).  
23  
24  
25

26 **Design**  
27  
28

29 40 A cross-sectional study **in a single school**  
30  
31

32 **Setting**  
33

34 42 A school in the outskirts of a large city, with a majority of the children belonging to lower and  
35  
36  
37 43 lower-middle socioeconomic categories.  
38  
39

40 **Subjects**  
41  
42

43 45 The total number of participants was 1,444, comprising 424 girls and 1,020 boys belonging to  
44  
45  
46 46 playgroups and grades 1-7.  
47  
48

49 **Measurements**  
50  
51

52 48 Anthropometric measurements, such as participants' MUAC, height, and weight were measured  
53  
54  
55 49 using standard techniques. Descriptive statistics for BMI and MUAC were obtained based on  
56  
57  
58  
59  
60

1  
2  
3 50 gender; Z-scores were computed using age-specific and sex-specific WHO reference data. The  
4  
5 51 distribution of variables was calculated for three groups: all participants together and separately  
6  
7  
8 52 for each gender. Homogeneous subsets for BMI and MUAC were identified in the three groups.  
9  
10 53 Age-wise comparisons of BMI and MUAC were conducted for each gender.  
11  
12  
13

#### 14 54 **Main outcome measures**

- 15 55 1. To know if MUAC and BMI are correlated among both boys and girls.
- 16  
17  
18  
19 56 2. To study BMI and MUAC Z score distribution among the subjects.  
20  
21  
22  
23

#### 24 57 **Results**

25  
26 58 The MUAC positively correlated with BMI in both boys and girls. The following BMI Z-score  
27  
28 59 distribution was observed: severe acute malnutrition (SAM), 5(0.3%); moderate acute  
29  
30  
31 60 malnutrition (MAM), 146 (10.1%); undernourished, at risk of MAM/SAM, 141 (9.8%); obese,  
32  
33 61 21 (1.5%); overweight, 36 (2.5%); pre-obese, 136 (9.4%). The distribution of categories of  
34  
35 62 children based on MUAC Z-scores was: SAM, 7(0.5%), MAM, 181 (12.5%), and  
36  
37 63 undernourished at risk of MAM or SAM, 181 (12.5%); obese, 19 (1.3%), overweight, 178  
38  
39  
40 64 (12.3%), pre-obese, 135 (9.3%).  
41  
42

#### 43 65 **Conclusions**

44  
45  
46 66 SAM/MAM/undernourished states and obesity/overweight/pre-obese, undernutrition more than  
47  
48 67 overweight, coexist among Indian schoolchildren from lower middle/lower socioeconomic  
49  
50  
51 68 categories. BMI and MUAC were significantly correlated. MUAC **identifies** both under-  
52  
53  
54 69 nutrition and over-nutrition by early detection of aberrant growth  
55  
56  
57  
58  
59  
60

## 70 Introduction

71 The double burden of under-nutrition and over-nutrition is emerging as a major problem.  
72 According to estimates from 129 countries with available data, 57 experience serious problems  
73 of both undernourished children and overweight adults [1]. The relationship between under-  
74 nutrition and overweight status and obesity is more than coexistence. The double burden of  
75 malnutrition (DBM) refers to the coexistence of both under-nutrition and over-nutrition within  
76 individuals, households, and populations and across the life course. “Across the life course”  
77 refers to the phenomenon that under-nutrition early in life contributes to an increased propensity  
78 for over-nutrition during adulthood [2]. The occurrence of DBM is attributed to a complex  
79 interplay of nutritional transitions (shifting from an active to a sedentary lifestyle, demographic  
80 transitions, etc.) from high fertility and early deaths to low fertility and aging populations and  
81 epidemiological transitions from communicable to non-communicable diseases [2].

82 Later in the life course, the double burden of disease is characterized by the coexistence  
83 of communicable (infectious disease) and non-communicable diseases. Prior to the 1970s,  
84 obesity was a relatively rare condition, even in the wealthiest of nations [3], whereas under-  
85 nutrition was a major problem, and nutrition supplementation was the main intervention. Thus,  
86 obesity is a relatively new problem in need of attention. A systematic review of obesity and  
87 socioeconomic status in developing countries concluded that child obesity is more prevalent  
88 among affluent groups within developing countries [4]. This may be attributed to improved  
89 access to surplus/excess food and a higher degree of urbanization and technological progress in  
90 these economies that render activities less laborious, resulting in less energy expenditure [5].  
91 Furthermore, childhood obesity is a strong predictor of adult obesity. For instance, a Japanese



1  
2  
3 92 study revealed that approximately one-third of obese children grew into obese adults  
4  
5 93 [6]. Therefore, early detection of excessive weight gain, and action to prevent its progress,  
6  
7  
8 94 is more likely to succeed than attempting to reverse obesity later.  
9

10  
11 95 Body mass index (BMI)-for-age, the internationally recommended measure of obesity,  
12  
13 96 suggests that Asians are at an increased risk of cardio-metabolic disorders, even at lower BMI  
14  
15 97 levels, because of a considerably higher body fat percentage [7]. Therefore, the World Health  
16  
17 98 Organization (WHO) recommends lowering the BMI cut-offs for “overweight” among Asian  
18  
19 99 adults [8] in light of the increased health risks. Therefore, early detection of an overweight status  
20  
21  
22  
23 100 has become very important in Asia.  
24

25  
26 101 The selection of height-based parameters, such as BMI for the detection of  
27  
28 102 overweight/obese children in low-resource settings, has limitations because of the shortage of  
29  
30 103 stadiometers and trained paramedical staff. A simpler proxy for BMI that parallels the use of  
31  
32 104 abdominal girth for detecting visceral obesity needs to be developed [9]. The mid-upper arm  
33  
34 105 circumference (MUAC) appears to be a promising alternative in this regard [10–14]. A recent  
35  
36 106 study from the Netherlands reaffirmed that, compared with BMI, MUAC is a valid measure for  
37  
38 107 detecting overweight/obesity, and thus is a good alternative to BMI [15]. Health workers are  
39  
40 108 familiar with MUAC measurement, as it has been commonly used for identifying severe acute  
41  
42  
43 109 under-nutrition among young (6–60 months of age) children [16].  
44  
45  
46

47 110 To our knowledge, few studies have focused on the coexistence of under- and over-  
48  
49 111 nutrition in India. The present study was conducted to document the extent of DBM among  
50  
51 112 Indian schoolchildren, a key group for intervention, using BMI and MUAC distributions. The  
52  
53  
54  
55  
56  
57  
58  
59  
60

1  
2  
3 113 study also examined whether MUAC can be used as a proxy for BMI, so that MUAC can detect  
4  
5 114 trends toward obesity or severe acute malnutrition (SAM).  
6  
7  
8

## 9 115 **Participants and Methods**

### 10 11 12 116 **Setting** 13 14 15

16 117 A **single school** cross-sectional study was conducted with schoolchildren from the outskirts  
17  
18 118 of Pune, India. This study was part of the MIMER medical college and hospital's outreach  
19  
20 119 activities regarding annual school health check-ups. A schedule of class-wise health check-ups  
21  
22 120 was developed in consultation with the school authorities who, in turn, sought parents'  
23  
24 121 permission. The study had the approval of the ethics committee of MIMER medical college and  
25  
26 122 hospital, Talegaon Dabhade. A majority of the children belonged to lower and lower-middle  
27  
28 123 socioeconomic categories. Children between 3–5 years were from a playgroup, and those  
29  
30 124 between 6–12 years belonged to grades 1–7.  
31  
32  
33  
34

### 35 125 **Anthropometric measurements** 36 37 38

39 126 Anthropometric measurements, such as MUAC, height, and weight, were taken from  
40  
41 127 each participant using standard techniques. Height (cm) was measured on a stadiometer (Easy  
42  
43 128 care) without shoes. Weight (kg) was measured using a digital weighing machine (Meditrin  
44  
45 129 Instruments) in light clothes and without shoes. MUAC (cm) was measured using a non-elastic  
46  
47 130 plastic tape at the midway between the olecranon and acromion processes on the upper left arm.  
48  
49 131 During these measurements, the participant was in a comfortable standing position and was  
50  
51 132 asked to look straight ahead with his/her shoulders in a neutral position. The participant's arm  
52  
53 133 was straightened, and we ensured that the tape was neither too tight nor too loose.  
54  
55  
56  
57  
58  
59  
60

### 134 **Statistical tools**

135 Open Source Statistical Software PSPP version 1.0.1 was used for all analyses, and a *p*-  
136 value  $\leq 0.05$  was considered statistically significant. Mean and standard deviation (SD), median,  
137 inter-quartile range, and Z-scores for BMI and MUAC were computed by sex for participants  
138 with complete measurements. Z-scores were computed using age-specific and sex-specific  
139 reference data from the WHO [17]. The distribution of variables was calculated among all  
140 participants together and separately for boys and girls. Homogeneous subsets for BMI and  
141 MUAC were identified in these three groups. Age-wise comparisons of BMI and MUAC were  
142 calculated for both girls and boys.

### 143 **Patient involvement**

144 Patients were not directly involved in the design of this study.

145

146

147

## 148 **Results**

149 The total number of participants was 1,444, comprising 424 girls and 1,020 boys. The  
150 distribution of variables among all participants, girls and boys, is shown in figures 1 and 2. Age,  
151 height, weight, MUAC, and BMI were all significantly different between girls and boys; boys  
152 had higher values for all parameters (Suppl. Files: table 1 and 2). As expected, BMI and MUAC  
153 showed age-wise differences for all participants, combined and separately, for boys and girls,  
154 between the ages of 3 to 16 years (Suppl. Files: tables 3 and 4). Tukey's HSD (honest significant  
155 difference) tests for homogeneous subsets revealed a significant shift in mean BMI at 3, 6, and  
156 10 years (Suppl. Files: table 5) whereas for MUAC, the shift occurred at 4, 6, and 9 years (Suppl.  
157 files: table 6). Thereafter, MUAC changed significantly almost every year until the age of 16.  
158 Thus, in contrast to BMI, MUAC had more age-dependent variability. BMI change with age was  
159 minimal in girls (only at age 14) compared to changes in boys at 6, 10, 12, and 14 years. Girls  
160 had six homogeneous subsets for MUAC, with the first significant rise at age of 4 years,  
161 compared to nine subsets in boys, with the first shift at age 5. Thus, changes in BMI and MUAC  
162 were more frequent in boys. MUAC was positively correlated with weight, height, and BMI both  
163 in girls and boys (Suppl. Files: tables 7 and 8).

## 165 **Discussion**

166 The present study suggests that DBM has reached Indian school children of lower middle  
167 or lower socioeconomic statuses, which calls for urgent action. Importantly, the present results  
168 identify children at the brink of sliding into severe forms of under – and over- nutrition. The

1  
2  
3 169 present study also suggests using a single and simpler method, MUAC, for detecting both forms  
4  
5 170 of malnutrition by monitoring growth during routine health check-ups.  
6  
7

8  
9 171 The World Health Assembly targets were considered in crafting the 2030 development  
10  
11 172 agenda and are referred to in target 2.2 of the Sustainable Development Goals to “end all forms  
12  
13 173 of malnutrition.” The reference to “all forms of malnutrition” is important for acknowledging the  
14  
15 174 existence of the double burden of under-nutrition and overweight. While the drivers of the  
16  
17 175 double burden of malnutrition are varied and often insidious, their effects present a clear case for  
18  
19 176 urgent action and demand an integrated response. Using a single tool for detecting both forms of  
20  
21 177 malnutrition integrates and simplifies the process.  
22  
23  
24

25 178 To our knowledge, few studies have focused on this aspect of growth among children in India, as  
26  
27 179 well as other emerging economies. The girls were outnumbered by boys (424 vs. 1020). This  
28  
29 180 may be because of the traditional gender norms that push girls into helping household chores and  
30  
31 181 sibling care that result in dropouts. Based on BMI Z-scores, 5 (0.3%) and 5 (0.3 %), belonged to  
32  
33 182 SAM and MAM categories, respectively and 21(1.5%) and 36 (3.9%) children were classified as  
34  
35 183 obese and overweight, respectively. MUAC Z-scores suggested the following distribution: SAM  
36  
37 184 -1(0.1%), and MAM-(0.4%), obesity-19 (1.3%), overweight-43 (4.3%). An even greater number  
38  
39 185 of children were leaning towards SAM or MAM as well as obesity or overweight. Children who  
40  
41 186 are not yet at the BMI-for-age threshold for the current definition of SAM or MAM (and  
42  
43 187 childhood obesity or overweight) may be at an increased risk of developing severe forms of  
44  
45 188 under-nutrition or obesity. One of the present study’s aims was to identify these target groups so  
46  
47 189 that these children’s needs could be addressed.  
48  
49  
50  
51  
52  
53  
54  
55  
56  
57  
58  
59  
60

1  
2  
3 190 The first target group, undernourished children (BMI or MUAC Z-score between -1 and -  
4  
5 191 2 SD), is at risk of sliding into MAM or SAM. The second group, pre-obese children (BMI or  
6  
7 192 MUAC Z-score between 1 and 2 SD), is at risk of progressing to overweight/obesity. Based on  
8  
9  
10 193 the BMI Z-scores, 181 (12.5%) were undernourished and 136 (9.4%) were pre-obese. The  
11  
12 194 equivalent numbers for MUAC were 181 (12.5%) for SAM and MAM risk and 135 (9.3%) for  
13  
14  
15 195 obesity, respectively. More children were at risk of severe undernutrition than of overnutrition.  
16  
17 196 These target groups may develop more severe forms of malnutrition if corrective measures are  
18  
19 197 delayed. The first step in that direction is to plan face-to-face counseling sessions with parents  
20  
21 198 and children. School programs are effective at preventing childhood obesity by fostering more  
22  
23 199 physical activities and recommending healthier diets [18]. Counseling for the target groups will  
24  
25  
26 200 have to be done, keeping in mind that within low-resource settings, places for play may be  
27  
28 201 scarce, sports infrastructure may be poor, and recreational centers may be lacking [19].  
29  
30  
31 202 Similarly, low family income is linked to greater consumption of low-quality nutrition and fast  
32  
33 203 food [20].  
34  
35

36 204 Importantly, MUAC as a single tool can facilitate this cohesive intervention by detecting  
37  
38 205 both under and over-nutrition during routine growth monitoring without a height-dependent  
39  
40 206 parameter, such as BMI (Figure1). This is because BMI and MUAC are significantly correlated  
41  
42 207 with each other. However, monitoring for obesity should begin even earlier, as the most rapid  
43  
44 208 weight gain occurs between ages 2 and 6 years among obese adolescents [21].  
45  
46  
47  
48

49 209 While India's economy has been growing at an impressive rate, the country still has the highest  
50  
51 210 number of stunted children in the world (46.8 million), representing one-third of the global total  
52  
53 211 of stunted children under age 5 [22]. Stunting is associated with being overweight among children  
54  
55  
56  
57  
58  
59  
60

1  
2  
3 212 in countries that are undergoing a nutritional transition [23].Economic improvements are  
4  
5 213 accompanied by a conspicuous change in dietary patterns in the form of increased fat intake [5]  
6  
7 214 compounded by exposure to food advertising on television leading to fast food and soft drink  
8  
9  
10 215 consumption and obesity [24]. This, coupled with low physical activity, contributes to an  
11  
12 216 increasing prevalence of obesity among adults, which accompanies the first wave of a cluster of  
13  
14 217 non-communicable diseases, such as hypertension and diabetes mellitus, called “the new world  
15  
16 218 syndrome” [25]. It should be noted, however, that there has not been the same level of agreement  
17  
18  
19 219 on the classification of obesity for children and adolescents as there is for adults [26].  
20  
21

22  
23 220 To summarize, until recently, India has considered under-nutrition to be a major problem,  
24  
25 221 and nutrition supplementation has been the key intervention. At the national level, India is at  
26  
27 222 stage 1 of the obesity transition with wide sub-national variations [27]. Our study may help in the  
28  
29 223 surveillance effort to address underserved populations [27]. With improved availability of food, a  
30  
31 224 double burden of malnutrition is emerging that needs to be concurrently addressed. The present  
32  
33 225 study observed the coexistence of obesity, overweight, pre-obese, and SAM, MAM, and  
34  
35 226 undernourished states among Indian school children in lower-middle and lower socioeconomic  
36  
37 227 levels. Second, the present results revealed a significant correlation between BMI and MUAC.  
38  
39 228 This study provides evidence to suggest that MUAC is a valid, single measurement for  
40  
41 229 identifying this dual problem of aberrant growth and over-nutrition on the one hand and under-  
42  
43 230 nutrition on the other, through extended routine growth monitoring of children. However, more  
44  
45  
46 231 studies are required to establish validity and reliability of this tool.  
47  
48  
49  
50  
51  
52

53  
54  
55  
56  
57  
58  
59  
60 232

1  
2  
3 **233 What is known about the subject?**  
4

- 5 **234** • Emerging economies face a dual problem of under-nutrition and over-nutrition.  
6  
7  
8 **235** • Detecting this problem using height-based parameters is not easy in a low-resource  
9  
10 **236** setting.

11  
12 **237 What this study adds?**  
13

14  
15 **238** This study suggests that MUAC is a simple, valid, and single measure for identifying this dual  
16  
17 **239** problem in a low-resource setting and, undernutrition is a bigger problem than obesity.  
18

19 **240**  
20  
21 **241**  
22  
23  
24 **242 Funding statement:** This research received no specific grant from any funding agency in public,  
25  
26 **243** commercial, or not-for-profit sectors.  
27

28  
29  
30 **244 Declaration of interests:** All authors have completed the ICMJE uniform disclosure form at and  
31  
32 **245** confirm no support from any organization for the submitted work; no financial relationships with  
33  
34 **246** any organizations that might have an interest in the submitted work in the previous three years;  
35  
36 **247** no other relationships or activities that could appear to have influenced the submitted work.  
37

38  
39  
40 **248**

41  
42 **249 Author contributions**  
43

44  
45 **250 SD-Conceptualization; Data analysis; Manuscript writing.**  
46

47 **251** SM-Data collection; data analysis; manuscript writing.  
48

49  
50 **252** AK- Data analysis; manuscript writing.  
51

52 **253** ED- Data collection; manuscript writing.  
53

54  
55 **254**  
56  
57  
58  
59  
60



1  
2  
3 **255** **References**  
4  
5

- 6 **256** 1. Nestle M. Rethinking nutritional policies in developing countries taking into account the  
7  
8 **257** double burden of malnutrition.2016 Oct 18 [Cited 2016 Oct 18]. In: Ideas4Development Blog  
9  
10 **258** [Internet]. Available from: <https://ideas4development.org/en/rethinking-nutritional-policies>  
11  
12  
13  
14 **259** 2. Shrimpton R, Rokx C. Health, nutrition, and population (HNP) discussion paper: The double  
15  
16 **260** burden of malnutrition: a review of global evidence. 2012. [cited 12 Aug 2002].  
17  
18 **261** [Internet]. Washington (DC): The World Bank. Available from:  
19  
20 **262** [http://documents.worldbank.org/curated/en/905651468339879888/The-double-burden-of-](http://documents.worldbank.org/curated/en/905651468339879888/The-double-burden-of-malnutrition-a-review-of-global-evidence)  
21  
22 **263** [malnutrition-a-review-of](http://documents.worldbank.org/curated/en/905651468339879888/The-double-burden-of-malnutrition-a-review-of-global-evidence) global evidence.  
23  
24  
25  
26 **264** 3. Prentice AM. The double burden of malnutrition in countries passing through the economic  
27  
28 **265** transition. *Ann Nutr Metab.* 2018; 72(suppl 3):47–54.doi: 10.1159/000487383.  
29  
30  
31  
32 **266** 4. Dinsa GD, Goryakin Y, Fumagalli E, Suhrcke M. Obesity and socioeconomic status in  
33  
34 **267** developing countries: a systematic review. *Obes Rev.* 2012; 13(11):1067–1079. doi:  
35  
36 **268** 10.1111/j.1467-789X.2012.01017.  
37  
38  
39 **269** 5. Kennedy G, Nantel G, Shetty P. Assessment of the double burden of malnutrition in six case  
40  
41 **270** study countries. In: *The double burden of malnutrition: Case studies from six developing*  
42  
43 **271** *countries.* Rome, Italy: Food and Agriculture Organization of the United Nations; 2006. pp. 1–18.  
44  
45  
46  
47 **272** 6. Ketel K. Two decades of annual medical examinations in Japanese obese children: do obese  
48  
49 **273** children grow into obese adults? *Int J Obes Relat Metab Disord.* 1997; 21:912–921.  
50  
51  
52  
53  
54  
55  
56  
57  
58  
59  
60

- 1  
2  
3 274 7. de Wilde JA, van Dommelen P, Middelkoop BJ. Appropriate body mass index cut-offs to  
4  
5 275 determine thinness, overweight and obesity in south Asian children in the Netherlands.  
6  
7 276 PLoSOne.2013; 8(12): e82822.doi:10.1371/journal.pone.0082822.  
8  
9  
10  
11 277 8. World Health Organization Expert Consultation.Appropriate body-mass index for Asian  
12  
13 278 populations and its implications for policy and intervention strategies.Lancet. 2004;363:157–  
14  
15 279 163.doi: 10.1016/S0140-6736(03)15268-3  
16  
17  
18 280 9.Liu A, Hills AP, Hu X, Li Y, Du L, Xu Y, et al. Waist circumference cut-off values for the  
19  
20 281 prediction of cardiovascular risk factors clustering in Chinese school-aged children: a cross-  
21  
22 282 sectional study. BMC Public Health. 2010; 10:82. doi: 10.1186/1471-2458-10-82  
23  
24  
25  
26 283 10. Craig E, Bland R, Ndirangu J, Reilly JJ. Use of mid-upper arm circumference for  
27  
28 284 determining overweight and overfatness in children and adolescents.Arch Dis Child.2014;  
29  
30 285 99:763–766. doi: 10.1136/archdischild-2013-305137 763.11. Chaput JP, Katzmarzyk PT, Barnes  
31  
32 286 JD, Fogelholm M, Hu G, Kuriyan R, et al. Mid-upper arm circumference as a screening tool for  
33  
34 287 identifying children with obesity: a 12-country study. *Pediatr Obes.* 2017; 12(6):439–445. doi:  
35  
36 288 10.1111/ijpo.12162.  
37  
38  
39  
40  
41 289 12. Asif M, Aslam M, Altaf S. Mid-upper-arm circumference as a screening measure for  
42  
43 290 identifying children with elevated body mass index: a study for Pakistan. *Korean J*  
44  
45 291 *Pediatr.*2018;61(1):6–11.doi: 10.3345/kjp.2018.61.1.6  
46  
47  
48  
49 292 13. Jaiswal M, Bansal R, Agarwal A. Role of mid-upper arm circumference for determining  
50  
51 293 overweight and obesity in children and adolescents. *J Clin Diagn Res.* 2017; 11(8):SC05–  
52  
53 294 SC08.doi: 10.7860/JCDR/2017/27442.10422  
54  
55  
56  
57  
58  
59  
60

- 1  
2  
3 295 14. Lu Q, Wang R, Lou DH, Ma CM, Liu XL, Yin FZ. Mid-upper-arm circumference and arm-  
4  
5 296 to-height ratio in evaluation of overweight and obesity in Han  
6  
7 297 children. *Pediatr Neonatol*. 2014;55:14–19. doi: 10.1016/j.pedneo.2013.05.004.  
8  
9  
10 298 15. Talma H, van Dommelen P, Schweizer JJ, Bakker B, Kist-van Holthe JE, Chinpaw JMM, et  
11  
12 299 al. Is mid-upper arm circumference in Dutch children useful in identifying obesity? *Arch Dis*  
13  
14 300 *Child*. 2019; 104(2):159–165. doi: 10.1136/archdischild-2017-313528.  
15  
16  
17  
18 301 16. Roberfroid D, Hammami N, Lachat C, Weise Prinzo Z, Sibson V, Guesdon B, et al.  
19  
20 302 Utilization of mid-upper arm circumference versus weight-for-height in nutritional rehabilitation  
21  
22 303 programmes: A systematic review of evidence. Geneva, Switzerland: World Health  
23  
24 304 Organization; 2013.  
25  
26  
27  
28 305 17. WHO Multicentre Growth Reference Study Group. WHO child growth standards based on  
29  
30 306 length/height, weight and age. *Acta Paediatr*. 2006; 450(Suppl.):76–85.  
31  
32  
33  
34 307 18. Veugelers PJ, Fitzgerald AL. Effectiveness of school programs in preventing childhood  
35  
36 308 obesity: a multilevel comparison. *Am J Pub Health*. 2005; 95(3):432–435. doi:  
37  
38 309 10.2105/AJPH.2004.045898  
39  
40  
41  
42 310 19. Ludwig J, Sanbonmatsu L, Gennetian L, Adam E, Duncan GJ, Katz LF, et al.  
43  
44 311 Neighborhoods, obesity, and diabetes—a randomized social experiment. *N Engl J Med*. 2011;  
45  
46 312 365:1509–1519. doi: 10.1056/NEJMsa1103216  
47  
48  
49 313 20. Zenk SN, Powell LM, Rimkus L, Isgor Z, Barker DC, Ohri-Vachaspati P, Chaloupka F.  
50  
51 314 Relative and absolute availability of healthier food and beverage alternatives across communities  
52  
53  
54  
55  
56  
57  
58  
59  
60

- 1  
2  
3 315 in the United States. *Am J Pub Health*.2014;104(11):2170–2178.doi:  
4  
5 316 10.2105/AJPH.2014.302113  
6  
7  
8 317 21.Geserick M, Vogel M, Gausche R, Lipek T, Spielau U, Keller E, et al. Acceleration of BMI in  
9  
10 318 early childhood and risk of sustained obesity. *N Engl J Med*.2018; 379:1303–1312. doi:  
11  
12 319 10.1056/NEJMoal803527  
13  
14  
15  
16 320 22. UNICEF India. Stunting. December 2018. [Internet]. New Delhi, India: UNICEF. Available  
17  
18 321 from: <http://unicef.in/Whatwedo/10/Stunting>.  
19  
20  
21 322 23. Popkin BM, Richards MK, Monteiro CA. Stunting is associated with overweight in children  
22  
23 323 in countries that are undergoing the nutrition transition.*J Nutr*.1996; 126(12):3009–3016.doi:  
24  
25 324 10.1093/jn/126.12.3009.  
26  
27  
28  
29 325 24. Andreyeva T, Kelly IR, Harris JL. Exposure to food advertising on television: associations  
30  
31 326 with children's fast food and soft drink consumption and obesity. *Econ Hum Biol*. 2011 Jul;  
32  
33 327 9(3):221-33. doi: 10.1016/j.ehb.2011.02.004. Epub 2011 Mar 5.  
34  
35  
36  
37 328 25. Kolčić I. Double burden of malnutrition: a silent driver of double burden of disease in low-  
38  
39 329 and middle-income countries.*J Glob Health*. 2012; 2(2):020303. doi: 10.7189/jogh.02.020303.  
40  
41  
42  
43 330 26. Chan RSM, Woo J. Prevention of overweight and obesity: how effective is the current public  
44  
45 331 health approach.*Int J Environ Res Public Health*. 2010; 7(3):765–783.  
46  
47 332 doi:10.3390/ijerph703076526  
48  
49  
50 333 27. Jaacks LM, Vandevijvere S, Pan A, McGowan CJ, Wallace C, Imamura F, et al. The obesity  
51  
52 334 transition: stages of the global epidemic. *Lancet Diabetes*  
53  
54 335 *Endocrinol*.2019.[http://dx.doi.org/10.1016/S2213-8587\(19\)300](http://dx.doi.org/10.1016/S2213-8587(19)300)  
55  
56  
57  
58  
59  
60

336

337

338

339

340

**Table 1****Correlations between anthropometric parameters among girls (N=424)**

| Variables               |                     | MUAC      | Body weight (Kg) | Height (cm) | BMI       |
|-------------------------|---------------------|-----------|------------------|-------------|-----------|
| <b>MUAC</b>             | Pearson Correlation | 1         | .897(**)         | .700(**)    | .826(**)  |
|                         | p-value             |           | 7.34E-152        | 1.21E-63    | 6.86E-107 |
| <b>Body weight (Kg)</b> | Pearson Correlation | .897(**)  | 1                | .866(**)    | .776(**)  |
|                         | p-value             | 7.34E-152 |                  | 2.85E-129   | 1.93E-86  |
| <b>Height (cm)</b>      | Pearson Correlation | .700(**)  | .866(**)         | 1           | .385(**)  |
|                         | p-value             | 1.21E-63  | 2.85E-129        |             | 2.16E-16  |
| <b>BMI</b>              | Pearson Correlation | .826(**)  | .776(**)         | .385(**)    | 1         |
|                         | p-value             | 6.86E-107 | 1.93E-86         | 2.16E-16    |           |

341 \*\* Correlation is significant at the 0.01 level (2-tailed).

342 **Table 2**  
 343 **Correlations between anthropometric parameters among boys (N=1020)**  
 344

| Variables               |                     | MUAC      | Body weight (Kg) | Height (cm) | BMI       |
|-------------------------|---------------------|-----------|------------------|-------------|-----------|
| <b>MUAC</b>             | Pearson Correlation | 1         | .911(**)         | .780(**)    | .847(**)  |
|                         | p-value             |           | 0.0001           | 9.60E-210   | 2.21E-281 |
| <b>Body weight (Kg)</b> | Pearson Correlation | .911(**)  | 1                | .886(**)    | .861(**)  |
|                         | p-value             | 0.0001    |                  | 0.0001      | 1.25E-301 |
| <b>Height (cm)</b>      | Pearson Correlation | .780(**)  | .886(**)         | 1           | .564(**)  |
|                         | p-value             | 9.60E-210 | 0.0001           |             | 1.02E-86  |
| <b>BMI</b>              | Pearson Correlation | .847(**)  | .861(**)         | .564(**)    | 1         |
|                         | p-value             | 2.21E-281 | 1.25E-301        | 1.02E-86    |           |

345 \*\* Correlation is significant at the 0.01 level (2-tailed).

**Table 3**  
**Distribution of nutrition conditions based on BMI and MUAC Z-scores \*\***

| <b>Condition</b>                        | <b>Based on BMI Z-scores<br/>No (%)</b> | <b>Based on MUAC Z-scores<br/>No (%)</b> |
|-----------------------------------------|-----------------------------------------|------------------------------------------|
| <b>Pre-obese</b>                        | BMI >1 to 2 SD<br>136 (9.4%)            | MUAC >1 to 2SD<br>135 (9.3%)             |
| <b>Overweight</b>                       | BMI >2 to 3 SD<br>36 (2.5%)             | MUAC >2 to 3SD<br>43 (3.0%)              |
| <b>Obese</b>                            | BMI >3SD<br>21 (1.5%)                   | MUAC >3SD<br>19(1.3%)                    |
| <b>Possible risk of<br/>underweight</b> | BMI <-1 to -2 SD<br>141 (9.8%)          | MUAC ≤ -1 to -2SD<br>181 (12.5%)         |
| <b>Thin</b>                             | BMI <-2 to -3 SD<br>5 (0.3%)            | MUAC <-2 to -3SD<br>6 (0.4%)             |
| <b>Severely thin</b>                    | BMI <-3SD<br>5 (0.3%)                   | MUAC <-3 SD<br>1(0.1%)                   |

\*\*Modified WHO Classification of nutrition conditions based on anthropometry

BMI = Body Mass Index; MUAC = Mid-upper-arm circumference

1  
2  
3  
4  
5  
6  
7  
8  
9  
10  
11  
12  
13  
14  
15  
16  
17  
18  
19  
20  
21  
22  
23  
24  
25  
26  
27  
28  
29  
30  
31  
32  
33  
34  
35  
36  
37  
38  
39  
40  
41  
42  
43  
44  
45  
46  
47  
48  
49  
50  
51  
52  
53  
54  
55  
56  
57  
58  
59  
60

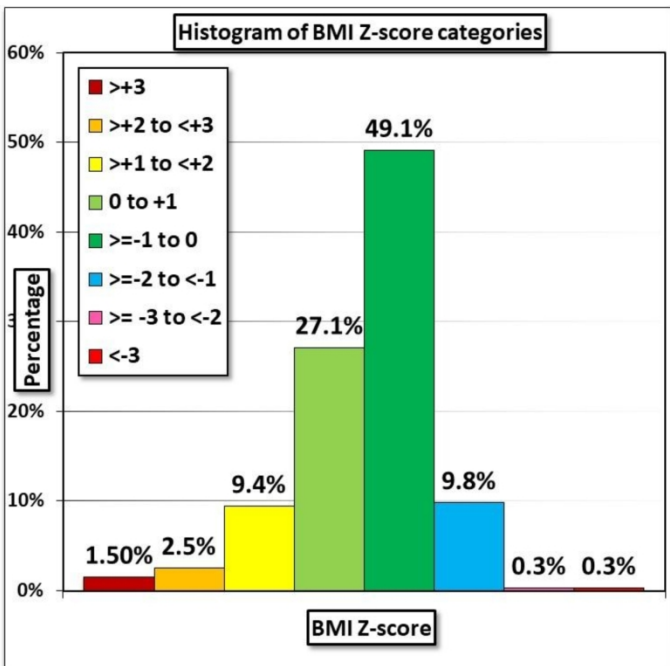

215x279mm (300 x 300 DPI)



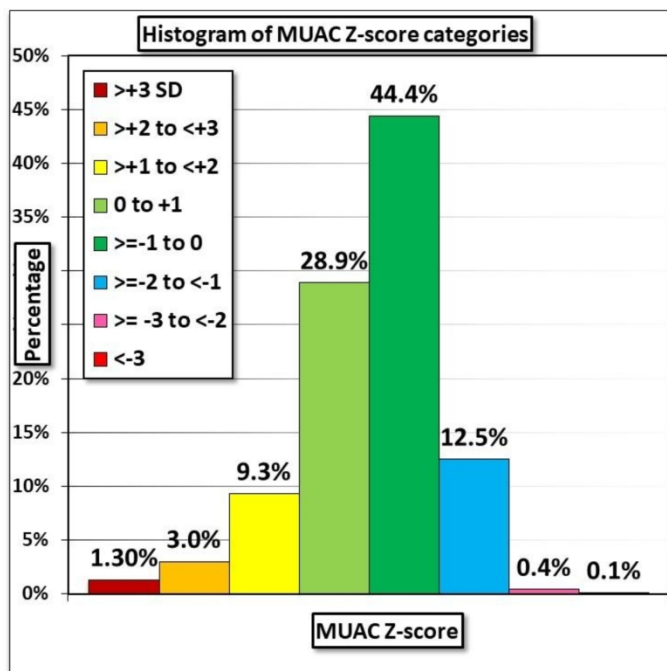

215x279mm (300 x 300 DPI)

**Table 1 (S)**  
**Comparison of variables between girls and boys**

| Variables ^             | Girls (n=424) |       |        |       | Boys (n=1020) |       |        |       | Mann-Whitney Test |                   |
|-------------------------|---------------|-------|--------|-------|---------------|-------|--------|-------|-------------------|-------------------|
|                         | Mean          | SD    | Median | IQR   | Mean          | SD    | Median | IQR   | Z-value           | p-value           |
| <b>Age (years)</b>      | 7.63          | 2.82  | 7.00   | 5.00  | 8.80          | 3.69  | 9.00   | 5.00  | -5.162            | <b>2.44E-07 *</b> |
| <b>Height (cm)</b>      | 125.16        | 16.95 | 125.00 | 26.00 | 134.06        | 22.16 | 133.15 | 34.00 | -6.626            | <b>3.44E-11 *</b> |
| <b>Body weight (kg)</b> | 22.48         | 8.83  | 20.20  | 10.40 | 28.93         | 14.96 | 24.20  | 19.40 | -7.215            | <b>5.41E-13 *</b> |
| <b>BMI</b>              | 13.84         | 2.33  | 13.20  | 2.14  | 15.04         | 3.31  | 13.98  | 3.24  | -7.374            | <b>1.66E-13 *</b> |
| <b>MUAC</b>             | 17.52         | 2.61  | 16.85  | 3.30  | 18.94         | 3.83  | 17.95  | 5.00  | -6.233            | <b>4.59E-10 *</b> |

^ All data failed a "Normality Test," so a Mann-Whitney U Rank Sum Test was applied.

\* Difference is statistically significant.

BMI=Body Mass Index; MUAC=Mid-upper-arm circumference

**Table 2 (S)**  
**Distribution of variables among all participants**

| <b>Variables</b>        | <b>Mean</b> | <b>SD</b> | <b>Median</b> | <b>IQR</b> | <b>Minimum</b> | <b>Maximum</b> |
|-------------------------|-------------|-----------|---------------|------------|----------------|----------------|
| <b>Age (years)</b>      | 8.46        | 3.50      | 9.00          | 6.00       | 3.00           | 16.00          |
| <b>Body weight (kg)</b> | 27.04       | 13.77     | 23.10         | 16.20      | 9.00           | 97.50          |
| <b>Height (cm)</b>      | 131.45      | 21.16     | 130.00        | 32.00      | 84.00          | 188.00         |
| <b>Height (meters)</b>  | 1.31        | 0.21      | 1.30          | 0.32       | 0.84           | 1.88           |
| <b>BMI</b>              | 14.69       | 3.10      | 13.78         | 2.89       | 6.58           | 36.10          |
| <b>MAC</b>              | 18.53       | 3.57      | 17.50         | 4.30       | 12.20          | 35.00          |

SD = standard deviation; IQR = inter-quartile range; BMI = Body Mass Index; MUAC = Mid-upper-arm circumference

**Table 3 (S)**  
**Age-wise distribution of BMI among all participants**

| Age (years) | BMI   |      |        |       |
|-------------|-------|------|--------|-------|
|             | Mean  | SD   | Median | IQR   |
| 3           | 13.37 | 1.34 | 13.26  | 1.61  |
| 4           | 13.04 | 1.69 | 13.07  | 1.46  |
| 5           | 13.01 | 1.13 | 12.80  | 1.02  |
| 6           | 13.85 | 2.09 | 13.39  | 1.55  |
| 7           | 13.54 | 1.48 | 13.20  | 1.90  |
| 8           | 13.94 | 2.22 | 13.37  | 2.01  |
| 9           | 13.70 | 1.73 | 13.36  | 1.66  |
| 10          | 14.74 | 2.84 | 13.97  | 2.77  |
| 11          | 15.48 | 3.03 | 14.89  | 3.60  |
| 12          | 15.89 | 3.01 | 15.63  | 3.87  |
| 13          | 18.22 | 3.34 | 17.51  | 3.30  |
| 14          | 18.33 | 3.88 | 17.28  | 4.53  |
| 15          | 19.09 | 4.32 | 18.01  | 6.52  |
| 16          | 21.38 | 5.89 | 23.55  | 11.09 |

SD = standard deviation; IQR = inter-quartile range

**Table 4 (S)**  
**Age-wise distribution of MUAC among all participants**

| Age (years) | MUAC  |      |        |      |
|-------------|-------|------|--------|------|
|             | Mean  | SD   | Median | IQR  |
| 3           | 15.39 | 1.24 | 15.20  | 1.50 |
| 4           | 15.50 | 1.16 | 15.50  | 1.10 |
| 5           | 16.19 | 1.17 | 15.95  | 1.20 |
| 6           | 16.83 | 2.07 | 16.50  | 1.95 |
| 7           | 16.98 | 1.75 | 16.70  | 2.00 |
| 8           | 17.97 | 2.11 | 17.50  | 1.61 |
| 9           | 17.79 | 1.78 | 17.50  | 2.08 |
| 10          | 19.02 | 2.63 | 18.50  | 3.45 |
| 11          | 20.16 | 3.04 | 19.50  | 3.93 |
| 12          | 20.87 | 2.79 | 20.50  | 4.00 |
| 13          | 22.91 | 2.79 | 22.50  | 2.60 |
| 14          | 23.53 | 3.64 | 23.00  | 4.95 |
| 15          | 24.66 | 3.73 | 23.50  | 5.23 |
| 16          | 25.81 | 4.63 | 27.20  | 7.75 |

SD = standard deviation; IQR = inter-quartile range

**Table 5 (S)**  
**Homogeneous Subsets: BMI: Tukey HSD**

| Age (years) | No. | Subset for alpha = 0.05 |        |        |        |        |        |
|-------------|-----|-------------------------|--------|--------|--------|--------|--------|
|             |     | 1                       | 2      | 3      | 4      | 5      | 6      |
| 5           | 132 | 13.011                  |        |        |        |        |        |
| 4           | 146 | 13.038                  |        |        |        |        |        |
| 3           | 102 | 13.366                  | 13.366 |        |        |        |        |
| 7           | 156 | 13.537                  | 13.537 |        |        |        |        |
| 9           | 72  | 13.696                  | 13.696 |        |        |        |        |
| 6           | 109 | 13.852                  | 13.852 | 13.852 |        |        |        |
| 8           | 65  | 13.939                  | 13.939 | 13.939 |        |        |        |
| 10          | 220 |                         | 14.740 | 14.740 | 14.740 |        |        |
| 11          | 182 |                         |        | 15.481 | 15.481 |        |        |
| 12          | 77  |                         |        |        | 15.892 |        |        |
| 13          | 30  |                         |        |        |        | 18.224 |        |
| 14          | 72  |                         |        |        |        | 18.325 |        |
| 15          | 72  |                         |        |        |        | 19.094 |        |
| 16          | 9   |                         |        |        |        |        | 21.380 |
| <b>Sig.</b> |     | 0.836                   | 0.232  | 0.059  | 0.529  | 0.892  | 1.000  |

Means for groups in homogeneous subsets are displayed.  
 BMI = Body Mass Index

**Table 6 (S)**  
**Homogeneous Subsets: MUAC: Tukey HSD (Table No. 4)**

| Age (years) | No. | Subset for alpha = 0.05 |        |        |        |        |        |        |        |        |
|-------------|-----|-------------------------|--------|--------|--------|--------|--------|--------|--------|--------|
|             |     | 1                       | 2      | 3      | 4      | 5      | 6      | 7      | 8      | 9      |
| 3           | 102 | 15.385                  |        |        |        |        |        |        |        |        |
| 4           | 146 | 15.500                  | 15.500 |        |        |        |        |        |        |        |
| 5           | 132 | 16.194                  | 16.194 |        |        |        |        |        |        |        |
| 6           | 109 | 16.826                  | 16.826 | 16.826 |        |        |        |        |        |        |
| 7           | 156 |                         | 16.979 | 16.979 |        |        |        |        |        |        |
| 9           | 72  |                         |        | 17.794 | 17.794 |        |        |        |        |        |
| 8           | 65  |                         |        | 17.972 | 17.972 |        |        |        |        |        |
| 10          | 220 |                         |        |        | 19.015 | 19.015 |        |        |        |        |
| 11          | 182 |                         |        |        |        | 20.161 | 20.161 |        |        |        |
| 12          | 77  |                         |        |        |        |        | 20.871 |        |        |        |
| 13          | 30  |                         |        |        |        |        |        | 22.907 |        |        |
| 14          | 72  |                         |        |        |        |        |        | 23.532 | 23.532 |        |
| 15          | 72  |                         |        |        |        |        |        |        | 24.658 | 24.658 |
| 16          | 9   |                         |        |        |        |        |        |        |        | 25.811 |
| <b>Sig.</b> |     | 0.102                   | 0.08   | 0.421  | 0.314  | 0.423  | 0.961  | 0.987  | 0.452  | 0.412  |

Means for groups in homogeneous subsets are displayed.

MUAC = Mid-upper-arm circumference

**Table 7 (S)**  
**Association among the cases between BMI (Z-Score) internally and by gender**

| Internal BMI (Z-Score) |     | Gender |        | Total  |
|------------------------|-----|--------|--------|--------|
|                        |     | Female | Male   |        |
| >+3                    | No. | 5      | 16     | 21     |
|                        | %   | 1.2%   | 1.6%   | 1.5%   |
| >+2 to <+3             | No. | 11     | 25     | 36     |
|                        | %   | 2.6%   | 2.5%   | 2.5%   |
| >+1 to <+2             | No. | 47     | 89     | 136    |
|                        | %   | 11.1%  | 8.7%   | 9.4%   |
| 0 to +1 ^              | No. | 109    | 282    | 391    |
|                        | %   | 25.7%  | 27.6%  | 27.1%  |
| >=-1 to 0 ^            | No. | 209    | 500    | 709    |
|                        | %   | 49.3%  | 49.0%  | 49.1%  |
| >=-2 to <-1 ^          | No. | 39     | 102    | 141    |
|                        | %   | 9.2%   | 10.0%  | 9.8%   |
| >= -3 to <-2 ^         | No. | 3      | 2      | 5      |
|                        | %   | 0.7%   | 0.2%   | 0.3%   |
| <-3 ^                  | No. | 1      | 4      | 5      |
|                        | %   | 0.2%   | 0.4%   | 0.3%   |
| Total                  | No. | 424    | 1020   | 1444   |
|                        | %   | 100.0% | 100.0% | 100.0% |

| Chi-Square Test         | Value | df | p-value | Association     |
|-------------------------|-------|----|---------|-----------------|
| Pearson's Chi-Square \$ | 5.199 | 7  | 0.636   | Not significant |
| Pearson's Chi-Square ^  | 2.262 | 3  | 0.520   | Not significant |

\$ 4 cells (25.0%) have expected count less than 5. ^ Row data pooled and Chi-Square test reapplied.

BMI = Body Mass Index



**Table 8 (S)**  
**Association among the cases between MUAC (Z-Score) internally and by gender**

| Internal MUAC (Z-Score) |     | Gender |        | Total  |
|-------------------------|-----|--------|--------|--------|
|                         |     | Female | Male   |        |
| >+3 SD                  | No. | 3      | 16     | 19     |
|                         | %   | 0.7%   | 1.6%   | 1.3%   |
| >+2 to <+3              | No. | 17     | 26     | 43     |
|                         | %   | 4.0%   | 2.5%   | 3.0%   |
| >+1 to <+2              | No. | 38     | 97     | 135    |
|                         | %   | 9.0%   | 9.5%   | 9.3%   |
| 0 to +1 ^               | No. | 131    | 287    | 418    |
|                         | %   | 30.9%  | 28.1%  | 28.9%  |
| >=-1 to 0 ^             | No. | 178    | 463    | 641    |
|                         | %   | 42.0%  | 45.4%  | 44.4%  |
| >=-2 to <-1 ^           | No. | 55     | 126    | 181    |
|                         | %   | 13.0%  | 12.4%  | 12.5%  |
| >= -3 to <-2 ^          | No. | 2      | 4      | 6      |
|                         | %   | 0.5%   | 0.4%   | 0.4%   |
| <-3 ^                   | No. | 0      | 1      | 1      |
|                         | %   | 0.0%   | 0.1%   | 0.1%   |
| Total                   | No. | 424    | 1020   | 1444   |
|                         | %   | 100.0% | 100.0% | 100.0% |

| Chi-Square Test         | Value | df | p-value | Association     |
|-------------------------|-------|----|---------|-----------------|
| Pearson's Chi-Square \$ | 6.054 | 7  | 0.533   | Not significant |
| Pearson's Chi-Square ^  | 3.929 | 3  | 0.269   | Not significant |

\$ 4 cells (25.0%) have expected count less than 5. ^ Row data pooled and Chi-Square test reapplied.

MUAC = Mid-upper-arm circumference

# BMJ Paediatrics Open

## **Double burden of malnutrition among Indian school children and its measurement: A cross-sectional study in a single school**

**Short title: Measuring double burden of malnutrition**

|                               |                                                                                                                                                                                                                                           |
|-------------------------------|-------------------------------------------------------------------------------------------------------------------------------------------------------------------------------------------------------------------------------------------|
| Journal:                      | <i>BMJ Paediatrics Open</i>                                                                                                                                                                                                               |
| Manuscript ID                 | bmjpo-2019-000505.R3                                                                                                                                                                                                                      |
| Article Type:                 | Original research                                                                                                                                                                                                                         |
| Date Submitted by the Author: | 15-Nov-2019                                                                                                                                                                                                                               |
| Complete List of Authors:     | Daga, Subhashchandra; Pacific Medical College and Hospital, Pediatrics Mhatre, Sameer; Smt Kashibai Navale Medical College and General Hospital, Paediatrics<br>Kasbe, Abhiram ; Topiwala National Medical College<br>DSouza, Eric; MIMER |
| Keywords:                     | General Paediatrics, Obesity, School Health, Tropical Paediatrics, Growth                                                                                                                                                                 |
|                               |                                                                                                                                                                                                                                           |

SCHOLARONE™  
Manuscripts

1  
2  
3  
4 1  
5  
6  
7 2 Double burden of malnutrition among Indian school children and its  
8  
9  
10 3 measurement: A cross-sectional study in a single school  
11  
12  
13

14 4 Short title: Measuring double burden of malnutrition  
15  
16  
17 5  
18  
19

20 6 SubhashchandraDaga<sup>1\*</sup>, Sameer Mhatre<sup>2</sup>, Eric Dsouza<sup>3</sup>, AbhiramKasbe<sup>4</sup>  
21  
22  
23 7  
24  
25

26 8 <sup>1</sup>Department of Pediatrics, Pacific Medical College and Hospital, Udaipur, India  
27  
28  
29

30 9 <sup>2</sup>Department of Pediatrics, Smt. KashibaiNavle Medical College, Pune, India  
31  
32

33 10 <sup>3</sup>Department of Pediatrics, MIMER Medical College, Talegaon, India  
34  
35

36 11 <sup>4</sup>Department of Pediatrics, Topiwala Medical College, Mumbai, India  
37  
38  
39 12  
40  
41

42 13  
43  
44

45 14 \*Corresponding author  
46  
47

48 15 E-mail: [dagasubhash49@gmail.com](mailto:dagasubhash49@gmail.com) (SD)  
49  
50

51 16 Tel: +91-9960522259  
52  
53  
54  
55 17  
56  
57

## 18 **Abstract**

### 19 **Objective**

20 This cross-sectional study set in a single school on the outskirts of a large city aimed to  
21 document the extent of double burden of malnutrition (coexistence of over- and under-nutrition)  
22 among Indian schoolchildren from lower socioeconomic groups, and to determine if mid-upper  
23 arm circumference (MUAC) can be used as a proxy for body mass index (BMI).

### 24 **Subjects**

25 The total number of participants was 1,444, comprising 424 girls and 1,020 boys belonging to  
26 playgroups and grades 1–7.

### 27 **Measurements**

28 Anthropometric measurements, such as participants' MUAC, height, and weight were measured  
29 using standard techniques. Descriptive statistics for BMI and MUAC were obtained based on  
30 gender; Z-scores were computed using age-specific and sex-specific WHO reference data. The  
31 distribution of variables was calculated for three groups: girls, boys, and all participants.  
32 Homogeneous subsets for BMI and MUAC were identified in the three groups. Age-wise  
33 comparisons of BMI and MUAC were conducted for each gender.

### 34 **Main outcome measures**

- 35 1. To know if MUAC and BMI are correlated among boys and girls.
- 36 2. To study BMI and MUAC Z score distribution among the participants.

## 37 Results

38 MUAC was positively correlated with BMI in both boys and girls. The following BMI Z-score  
39 distribution was observed: severe acute malnutrition (SAM), 5 (0.3%); moderate acute  
40 malnutrition (MAM), 146 (10.1%); undernourished, at risk of MAM/SAM, 141 (9.8%); obese,  
41 21 (1.5%); overweight, 36 (2.5%); pre-obese, 136 (9.4%). The distribution of categories of  
42 children based on MUAC Z-scores was: SAM, 7 (0.5%), MAM, 181 (12.5%), and  
43 undernourished at risk of MAM or SAM, 181 (12.5%); obese, 19 (1.3%), overweight, 178  
44 (12.3%), pre-obese, 135 (9.3%).

## 45 Conclusions

46 SAM/MAM/undernourished states and obesity/overweight/pre-obese states, indicating  
47 undernutrition more than overweight, coexist among Indian schoolchildren from lower  
48 middle/lower socioeconomic categories. BMI and MUAC were significantly correlated.  
49 MUAC identifies both under-nutrition and over-nutrition by early detection of aberrant growth.

## 51 Introduction

52 The double burden of under-nutrition and over-nutrition is an emerging international  
53 problem. According to estimates from 129 countries with available data, 57 experience serious  
54 problems of both undernourished children and overweight adults [1]. The relationship between  
55 under-nutrition and overweight status and obesity is deeper than coexistence. The double burden  
56 of malnutrition (DBM) refers to the coexistence of both under-nutrition and over-nutrition within  
57 individuals, households, and populations and across the life course. "Across the life course"

1  
2  
3 58 refers to the phenomenon that under-nutrition early in life contributes to an increased propensity  
4  
5 59 for over-nutrition during adulthood [2]. The occurrence of DBM is attributed to a complex  
6  
7 60 interplay of nutritional transitions (shifting from an active to a sedentary lifestyle, demographic  
8  
9 61 transitions, etc.) from high fertility and early deaths to low fertility and aging populations and  
10  
11 62 epidemiological transitions from communicable to non-communicable diseases [2].  
12  
13  
14  
15

16 63 Later in the life course, the double burden of disease is characterized by the coexistence  
17  
18 64 of communicable (infectious disease) and non-communicable diseases. Prior to the 1970s,  
19  
20 65 obesity was a relatively rare condition, even in the wealthiest of nations [3], whereas under-  
21  
22 66 nutrition was a major problem, and nutrition supplementation was the main intervention. Thus,  
23  
24 67 obesity is a relatively new problem in need of attention. A systematic review of obesity and  
25  
26 68 socioeconomic status in low and middle income countries concluded that child obesity is more  
27  
28 69 prevalent among affluent groups in such countries [4]. This may be attributed to improved access  
29  
30 70 to surplus/excess food and a higher degree of urbanization and technological progress in these  
31  
32 71 economies that render activities less laborious, resulting in less energy expenditure [5].  
33  
34 72 Furthermore, childhood obesity is a strong predictor of adult obesity. For instance, a Japanese  
35  
36 73 study revealed that approximately one-third of obese children grew into obese adults  
37  
38 74 [6]. Therefore, early detection of excessive weight gain, and action to prevent its progress,  
39  
40 75 is more likely to succeed than attempting to reverse obesity later.  
41  
42  
43  
44  
45  
46

47 76 Body mass index (BMI)-for-age, the internationally recommended measure of obesity,  
48  
49 77 suggests that Asians are at an increased risk of cardio-metabolic disorders, even at lower BMI  
50  
51 78 levels, because of a considerably higher body fat percentage [7]. Therefore, the World Health  
52  
53 79 Organization (WHO) recommends lowering the BMI cut-offs for being considered “overweight”  
54  
55  
56  
57  
58  
59  
60

1  
2  
3 80 among Asian adults [8] in light of the increased health risks. Early detection of overweight status  
4  
5 81 has become very important in Asia.  
6  
7

8 82 The selection of height-based parameters, such as BMI for the detection of  
9  
10 83 overweight/obese children in low-resource settings, has limitations because of the shortage of  
11  
12 84 stadiometers and trained paramedical staff. A simpler proxy for BMI that parallels the use of  
13  
14 85 abdominal girth for detecting visceral obesity needs to be developed [9]. The mid-upper arm  
15  
16 86 circumference (MUAC) appears to be a promising alternative in this regard [10–14]. A recent  
17  
18 87 study from the Netherlands reaffirmed that, compared with BMI, MUAC is a valid measure for  
19  
20 88 detecting overweight/obesity, and thus is a good alternative to BMI [15]. Health workers are  
21  
22 89 familiar with MUAC measurement, as it has been commonly used for identifying severe acute  
23  
24 90 under-nutrition among young (6–60 months of age) children [16].  
25  
26  
27  
28  
29

30 91 To our knowledge, few studies have focused on the coexistence of under- and over-  
31  
32 92 nutrition in India. The present study was conducted to document the extent of DBM among  
33  
34 93 Indian schoolchildren, a key group for intervention, using BMI and MUAC distributions. The  
35  
36 94 study also examined whether MUAC can be used as a proxy for BMI, so that MUAC can detect  
37  
38 95 trends toward obesity or severe acute malnutrition (SAM).  
39  
40  
41  
42

## 43 96 **Participants and Methods**

### 44 45 46 97 **Setting**

47  
48  
49 98 A single schoolcross-sectional study was conducted with schoolchildren from the  
50  
51 99 outskirts of Pune, India. This study was part of the MIMER medical college and hospital's  
52  
53 100 outreach activities regarding annual school health check-ups. A schedule of class-wise health  
54  
55  
56  
57  
58  
59  
60

1  
2  
3 101 check-ups was developed in consultation with the school authorities who, in turn, sought parents'  
4  
5 102 permission. The study had the approval of the ethics committee of MIMER medical college and  
6  
7 103 hospital, TalegaonDabhade. A majority of the children belonged to lower and lower-middle  
8  
9 104 socioeconomic categories. Children between 3 and 5 years were from a playgroup, and those  
10  
11 105 between 6 and 12 years belonged to grades 1–7.  
12  
13  
14  
15

### 16 106 **Anthropometric measurements**

17  
18  
19 107 Anthropometric measurements, such as MUAC, height, and weight, were taken from  
20  
21 108 each participant using standard techniques. Height (cm) was measured on a stadiometer (Easy  
22  
23 109 Care) without shoes. Weight (kg) was measured using a digital weighing machine (Meditrin  
24  
25 110 Instruments) in light clothes and without shoes. MUAC (cm) was measured using a non-elastic  
26  
27 111 plastic tape at the midway between the olecranon and acromion processes on the upper left arm.  
28  
29 112 During these measurements, the participant was in a comfortable standing position and was  
30  
31 113 asked to look straight ahead with his/her shoulders in a neutral position. The participant's arm  
32  
33 114 was straightened, and we ensured that the tape was neither too tight nor too loose.  
34  
35  
36  
37  
38

### 39 115 **Statistical tools**

40  
41 116 Open Source Statistical Software PSPP version 1.0.1 was used for all analyses, and a p-  
42  
43 117 value  $\leq 0.05$  was considered statistically significant. Mean and standard deviation (SD), median,  
44  
45 118 inter-quartile range, and Z-scores for BMI and MUAC were computed by sex for participants  
46  
47 119 with complete measurements. Z-scores were computed using age-specific and sex-specific  
48  
49 120 reference data from the WHO [17]. The distribution of variables was calculated among all  
50  
51 121 participants together and separately for boys and girls. Homogeneous subsets for BMI and  
52  
53  
54  
55  
56  
57  
58  
59  
60



1  
2  
3 122 MUAC were identified in these three groups. Age-wise comparisons of BMI and MUAC were  
4  
5 123 calculated for both girls and boys.  
6  
7

#### 8 124 **Patient involvement**

9  
10  
11 125 Patients were not directly involved in the design of this study.  
12  
13

### 14 126 **Results**

15  
16  
17  
18 127 The total number of participants was 1,444, comprising 424 girls and 1,020 boys. The  
19  
20 128 distribution of Z- scores among all participants is shown in Figures 1 and 2. Age, height, weight,  
21  
22 129 MUAC, and BMI were all significantly different between girls and boys; boys had higher values  
23  
24 130 for all parameters (Suppl. Files: Tables 1 and 2). As expected, BMI and MUAC showed age-wise  
25  
26 131 differences for all participants, combined and separately, for boys and girls, between the ages of  
27  
28 132 3 to 16 years (Suppl. Files: Tables 3 and 4). Tukey's honest significant difference (HSD) test for  
29  
30 133 homogeneous subsets revealed a significant shift in mean BMI at 3, 6, and 10 years (Suppl.  
31  
32 134 Files: Table 5), whereas for MUAC, the shift occurred at 4, 6, and 9 years (Suppl. Files: Table  
33  
34 135 6). Thereafter, MUAC changed significantly almost every year until the age of 16. Thus, in  
35  
36 136 contrast to BMI, MUAC had more age-dependent variability. BMI change with age was minimal  
37  
38 137 in girls (only at age 14) compared to changes in boys at 6, 10, 12, and 14 years. Girls had six  
39  
40 138 homogeneous subsets for MUAC, with the first significant rise at age 4 years, compared to nine  
41  
42 139 subsets in boys, with the first shift at age 5. Thus, changes in BMI and MUAC were more  
43  
44 140 frequent in boys. MUAC was associated with weight, height, and BMI both in girls and boys  
45  
46 141 (Tables 1 and 2).  
47  
48  
49  
50  
51  
52  
53

54 142  
55 143 **Table 1**  
56 144 **Correlations between anthropometric parameters among girls (N=424)**  
57

145

| Variables        |                     | MUAC      | Body weight (kg) | Height (cm) | BMI       |
|------------------|---------------------|-----------|------------------|-------------|-----------|
| MUAC             | Pearson Correlation | 1         | .897(**)         | .700(**)    | .826(**)  |
|                  | <i>p</i> -value     |           | 7.34E-152        | 1.21E-63    | 6.86E-107 |
| Body weight (kg) | Pearson Correlation | .897(**)  | 1                | .866(**)    | .776(**)  |
|                  | <i>p</i> -value     | 7.34E-152 |                  | 2.85E-129   | 1.93E-86  |
| Height (cm)      | Pearson Correlation | .700(**)  | .866(**)         | 1           | .385(**)  |
|                  | <i>p</i> -value     | 1.21E-63  | 2.85E-129        |             | 2.16E-16  |
| BMI              | Pearson Correlation | .826(**)  | .776(**)         | .385(**)    | 1         |
|                  | <i>p</i> -value     | 6.86E-107 | 1.93E-86         | 2.16E-16    |           |

146 \*\* Correlation is significant at the 0.01 level (2-tailed).

147 **Table 2**  
148 **Correlations between anthropometric parameters among boys (N=1020)**

149

| Variables        |                     | MUAC      | Body weight (kg) | Height (cm) | BMI       |
|------------------|---------------------|-----------|------------------|-------------|-----------|
| MUAC             | Pearson Correlation | 1         | .911(**)         | .780(**)    | .847(**)  |
|                  | <i>p</i> -value     |           | 0.0001           | 9.60E-210   | 2.21E-281 |
| Body weight (kg) | Pearson Correlation | .911(**)  | 1                | .886(**)    | .861(**)  |
|                  | <i>p</i> -value     | 0.0001    |                  | 0.0001      | 1.25E-301 |
| Height (cm)      | Pearson Correlation | .780(**)  | .886(**)         | 1           | .564(**)  |
|                  | <i>p</i> -value     | 9.60E-210 | 0.0001           |             | 1.02E-86  |
| BMI              | Pearson Correlation | .847(**)  | .861(**)         | .564(**)    | 1         |
|                  | <i>p</i> -value     | 2.21E-281 | 1.25E-301        | 1.02E-86    |           |

150 \*\* Correlation is significant at the 0.01 level (2-tailed).

151 The distribution of clinical categories of nutritional status with respect to BMI and  
 152 MUAC is shown in Table 3.

153 **Table 3**  
 154 **Distribution of nutrition conditions based on BMI and MUAC Z-scores \*\***  
 155

| Condition                               | Based on BMI Z-scores<br>No (%) | Based on MUACZ-scores<br>No (%)  |
|-----------------------------------------|---------------------------------|----------------------------------|
| <b>Pre-obese</b>                        | BMI >1 to 2 SD<br>136 (9.4%)    | MUAC>1to2SD<br>135 (9.3%)        |
| <b>Overweight</b>                       | BMI>2 to 3 SD<br>36 (2.5%)      | MUAC>2 to 3SD<br>43 (3.0%)       |
| <b>Obese</b>                            | BMI >3SD<br>21 (1.5%)           | MUAC>3SD<br>19(1.3%)             |
| <b>Possible risk of<br/>underweight</b> | BMI <-1 to -2 SD<br>141 (9.8%)  | MUAC ≤ -1 to -2SD<br>181 (12.5%) |
| <b>Thin</b>                             | BMI <-2 to -3 SD<br>5 (0.3%)    | MUAC<-2 to -3SD<br>6 (0.4%)      |
| <b>Severely thin</b>                    | BMI <-3SD<br>5 (0.3%)           | MUAC<-3 SD<br>1(0.1%)            |

156 **\*\*Modified WHO Classification of nutrition conditions based on anthropometry**  
 157 BMI = Body Mass Index; MUAC = Mid-upper-arm circumference

158

## 159 Discussion

160 The present study suggests that DBM has reached Indian school children of lower middle  
 161 or lower socioeconomic statuses, which calls for urgent action. Importantly, the present results  
 162 identify children at the brink of sliding into severe forms of under- and over-nutrition. The

1  
2  
3 163 present study also suggests using a single and simpler method, MUAC, for detecting both forms  
4  
5 164 of malnutrition by monitoring growth during routine health check-ups.  
6  
7

8 165 The World Health Assembly targets were considered in crafting the 2030 development  
9  
10 166 agenda and are referred to in target 2.2 of the Sustainable Development Goals to “end all forms  
11  
12 167 of malnutrition.” The reference to “all forms of malnutrition” is important for acknowledging the  
13  
14 168 existence of the double burden of under-nutrition and overweight status. While the drivers of the  
15  
16 169 double burden of malnutrition are varied and often insidious, their effects present a clear case for  
17  
18 170 urgent action and demand an integrated response. Using a single tool for detecting both forms of  
19  
20 171 malnutrition integrates and simplifies the process.  
21  
22  
23

24  
25 172 To our knowledge, few studies have focused on this aspect of growth among children in  
26  
27 173 India, as well as other emerging economies. The girls were outnumbered by boys (424 vs.  
28  
29 174 1,020). This may be due to the traditional gender norms that push girls into helping with  
30  
31 175 household chores and sibling care, resulting in school dropouts. Based on BMI Z-Scores, 5  
32  
33 176 (0.3%) and 5 (0.3%) belonged to SAM and MAM categories, respectively, and 21 (1.5%) and 36  
34  
35 177 (3.9%) children were classified as obese and overweight, respectively. MUAC Z-scores  
36  
37 178 suggested the following distribution: SAM -1 (0.1%), MAM-(0.4%), obesity-19 (1.3%),  
38  
39 179 overweight-43 (4.3%). An even greater number of children were leaning toward SAM or MAM  
40  
41 180 as well as obesity or overweight. Children who are not yet at the BMI-for-age threshold for the  
42  
43 181 current definition of SAM or MAM (and childhood obesity or overweight) may be at an  
44  
45 182 increased risk of developing severe forms of under-nutrition or obesity. One of the present  
46  
47 183 study’s aims was to identify these target groups so that these children’s needs could be  
48  
49  
50  
51  
52 184 addressed.  
53  
54  
55  
56  
57  
58  
59  
60

1  
2  
3 185 The first target group, undernourished children (BMI or MUACZ-score between -1 and -  
4  
5 186 2 SD), is at risk of sliding into MAM or SAM. The second group, pre-obese children (BMI or  
6  
7 187 MUACZ-score between 1 and 2 SD), is at risk of progressing to overweight/obesity. Based on  
8  
9 188 the BMI Z-scores, 181 (12.5%) were undernourished, and 136 (9.4%) were pre-obese. The  
10  
11 189 equivalent numbers for MUAC were 181 (12.5%) for SAM and MAM risk and 135 (9.3%) for  
12  
13 190 obesity, respectively. More children were at risk of severe undernutrition than of overnutrition.  
14  
15 191 These target groups may develop more severe forms of malnutrition if corrective measures are  
16  
17 192 delayed. The first step in that direction is to plan face-to-face counseling sessions with parents  
18  
19 193 and children. School programs are effective at preventing childhood obesity by fostering more  
20  
21 194 physical activities and recommending healthier diets [18]. Counseling for the target groups will  
22  
23 195 have to be done, keeping in mind that within low-resource settings, places for play may be  
24  
25 196 scarce, sports infrastructure may be poor, and recreational centers may be lacking [19].  
26  
27 197 Similarly, low family income is linked to greater consumption of low-quality nutrition and fast  
28  
29 198 food [20].  
30  
31  
32  
33  
34  
35

36 199 Importantly, MUAC as a single tool can facilitate this cohesive intervention by detecting  
37  
38 200 both under and over-nutrition during routine growth monitoring without a height-dependent  
39  
40 201 parameter, such as BMI (Figure 1). This is because BMI and MUAC are significantly correlated  
41  
42 202 with each other. However, monitoring for obesity should begin even earlier, as the most rapid  
43  
44 203 weight gain occurs between ages 2 and 6 years among obese adolescents [21].  
45  
46  
47  
48

49 204 While India's economy has been growing at an impressive rate, the country still has the  
50  
51 205 highest number of stunted children in the world (46.8 million), representing one-third of the  
52  
53 206 global total of stunted children under age 5 [22]. Stunting is associated with being overweight  
54  
55  
56  
57

1  
2  
3 207 among children in countries that are undergoing a nutritional transition [23].Economic  
4  
5 208 improvements are accompanied by a conspicuous change in dietary patterns in the form of  
6  
7 209 increased fat intake [5]compounded by exposure to food advertising on television leading to fast  
8  
9  
10 210 food and soft drink consumption and obesity [24].This, coupled with low physical activity,  
11  
12 211 contributes to an increasing prevalence of obesity among adults, which accompanies the first  
13  
14 212 wave of a cluster of non-communicable diseases, such as hypertension and diabetes mellitus,  
15  
16 213 called “the new world syndrome” [25]. It should be noted, however, that there has not been the  
17  
18 214 same level of agreement on the classification of obesity for children and adolescents as there is  
19  
20 215 for adults [26].  
21  
22  
23  
24

25 216 To summarize, until recently, India has considered under-nutrition to be a major problem,  
26  
27 217 and nutrition supplementation has been the key intervention. At the national level, India is at  
28  
29 218 stage 1 of the obesity transition with wide sub-national variations [27]. Our study may help in the  
30  
31 219 surveillance effort to address underserved populations [27]. With improved availability of food, a  
32  
33 220 double burden of malnutrition is emerging that needs to be concurrently addressed. The present  
34  
35 221 study observed the coexistence of obesity, overweight, pre-obese, and SAM, MAM, and  
36  
37 222 undernourished states among Indian school children in lower-middle and lower socioeconomic  
38  
39 223 levels. Second, the present results revealed a significant correlation between BMI and MUAC.  
40  
41 224 This study provides evidence to suggest that MUAC is a valid, single measurement for  
42  
43 225 identifying this dual problem of aberrant growth and over-nutrition on the one hand and under-  
44  
45 226 nutrition on the other, through extended routine growth monitoring of children. However, more  
46  
47  
48  
49 227 studies are required to establish the validity and reliability of this tool.  
50  
51  
52  
53  
54  
55  
56  
57  
58  
59  
60

1  
2  
3 **228 What is known about the subject?**  
4

- 5 229 • Emerging economies face a dual problem of under-nutrition and over-nutrition.  
6  
7  
8 230 • Detecting these problems using height-based parameters is not easy in a low-resource  
9  
10 231 setting.

11  
12 **232 What this study adds?**  
13

14  
15 233 This study suggests that MUAC is a simple, valid, and single measure for identifying this dual  
16  
17 234 problem in a low-resource setting, and undernutrition is a bigger problem than obesity.  
18

19 235  
20  
21 236 **Funding statement:** This research received no specific grant from any funding agency in public,  
22  
23 237 commercial, or not-for-profit sectors.  
24  
25

26  
27 238 **Declaration of interests:** All authors have completed the ICMJE uniform disclosure form and  
28  
29 239 confirm no support from any organization for the submitted work; no financial relationships with  
30  
31 240 any organizations that might have an interest in the submitted work in the previous three years;  
32  
33 241 no other relationships or activities that could appear to have influenced the submitted work.  
34  
35

36  
37 242  
38  
39 **243 Author contributions**  
40

41  
42 244 SD-Conceptualization; Data analysis; Manuscript writing.  
43

44  
45 245 SM-Data collection; data analysis; manuscript writing.  
46

47  
48 246 AK-Data analysis; manuscript writing.  
49

50  
51 247 ED-Data collection; manuscript writing.  
52

53 248  
54  
55  
56  
57  
58  
59  
60

249

**References**

- 1  
2  
3  
4  
5  
6  
7  
8  
9  
10  
11  
12  
13  
14  
15  
16  
17  
18  
19  
20  
21  
22  
23  
24  
25  
26  
27  
28  
29  
30  
31  
32  
33  
34  
35  
36  
37  
38  
39  
40  
41  
42  
43  
44  
45  
46  
47  
48  
49  
50  
51  
52  
53  
54  
55  
56  
57  
58  
59  
60
- 250 1. Nestle M. Rethinking nutritional policies in developing countries taking into account the  
251 double burden of malnutrition.2016 Oct 18 [Cited 2016 Oct 18]. In: Ideas4Development Blog  
252 [Internet]. Available from: <https://ideas4development.org/en/rethinking-nutritional-policies>
  - 253 2. Shrimpton R, Rokx C. Health, nutrition, and population (HNP) discussion paper: The double  
254 burden of malnutrition: a review of global evidence. 2012 [cited12 Aug 2002].  
255 [Internet].Washington (DC): The World Bank. Available from:  
256 [http://documents.worldbank.org/curated/en/905651468339879888/The-double-burden-of-](http://documents.worldbank.org/curated/en/905651468339879888/The-double-burden-of-malnutrition-a-review-of-global-evidence)  
257 [malnutrition-a-review-of global evidence](http://documents.worldbank.org/curated/en/905651468339879888/The-double-burden-of-malnutrition-a-review-of-global-evidence)
  - 258 3. Prentice AM. The double burden of malnutrition in countries passing through the economic  
259 transition. *Ann Nutr Metab.* 2018;72(suppl 3):47–54. doi: 10.1159/000487383.
  - 260 4. Dinsa GD, Goryakin Y, Fumagalli E, Sührcke M. Obesity and socioeconomic status in  
261 developing countries: a systematic review. *Obes Rev.* 2012;13(11):1067–1079. doi:  
262 10.1111/j.1467-789X.2012.01017.
  - 263 5. Kennedy G, Nantel G, Shetty P. Assessment of the double burden of malnutrition in six case  
264 study countries. In: *The double burden of malnutrition: case studies from six developing*  
265 *countries.* Rome, Italy: Food and Agriculture Organization of the United Nations; 2006. pp. 1–18.
  - 266 6. Kotani K, Nishida M, Yamashita S, Funahashi T, Fujioka S, Tokunaga K, et al. Two decades  
267 of annual medical examinations in Japanese obese children: do obese children grow into obese  
268 adults? *Int J Obes Relat Metab Disord.* 1997;21:912–921.



- 1  
2  
3 269 7. de Wilde JA, vanDommelen P, Middelkoop BJ. Appropriate body mass index cut-offs to  
4  
5 270 determine thinness, overweight and obesity in South Asian children in the Netherlands.  
6  
7 271 PLoSOne.2013;8(12):e82822.doi:10.1371/journal.pone.0082822.  
8  
9  
10  
11 272 8. World Health Organization Expert Consultation.Appropriate body-mass index for Asian  
12  
13 273 populations and its implications for policy and intervention strategies.Lancet.2004;363:157–  
14  
15 274 163.doi: 10.1016/S0140-6736(03)15268-3.  
16  
17  
18 275 9.Liu A, Hills AP, Hu X, Li Y, Du L, Xu Y, et al. Waist circumference cut-off values for the  
19  
20 276 prediction of cardiovascular risk factors clustering in Chinese school-aged children: a cross-  
21  
22 277 sectional study. BMC Public Health. 2010;10:82. doi: 10.1186/1471-2458-10-82.  
23  
24  
25  
26 278 10. Craig E, Bland R, Ndirangu J, Reilly JJ.Use of mid-upper arm circumference for determining  
27  
28 279 overweight and overfatness in children and adolescents.Arch Dis Child.2014;99:763–766. doi:  
29  
30 280 10.1136/archdischild-2013-305137 763.  
31  
32  
33  
34 281 11.Chaput JP, Katzmarzyk PT, Barnes JD, Fogelholm M, Hu G, Kuriyan R, et al. Mid-upper arm  
35  
36 282 circumference as a screening tool for identifying children with obesity: a 12-country  
37  
38 283 study.PediatrObes. 2017;12(6):439–445. doi: 10.1111/ijpo.12162.  
39  
40  
41  
42 284 12. Asif M, Aslam M, Altaf S. Mid-upper-arm circumference as a screening measure for  
43  
44 285 identifying children with elevated body mass index: a study for Pakistan. Korean J  
45  
46 286 Pediatr.2018;61(1):6–11.doi: 10.3345/kjp.2018.61.1.6.  
47  
48  
49  
50 287 13. Jaiswal M, Bansal R, Agarwal A. Role of mid-upper arm circumference for determining  
51  
52 288 overweight and obesity in children and adolescents. J ClinDiagn Res. 2017;11(8):SC05–  
53  
54 289 SC08.doi: 10.7860/JCDR/2017/27442.10422.  
55  
56  
57  
58  
59  
60

- 1  
2  
3 290 14. Lu Q, Wang R, Lou DH, Ma CM, Liu XL, Yin FZ. Mid-upper-arm circumference and arm-  
4  
5 291 to-height ratio in evaluation of overweight and obesity in Han  
6  
7 292 children. *Pediatr Neonatol*. 2014;55:14–19. doi: 10.1016/j.pedneo.2013.05.004.  
8  
9  
10 293 15. Talma H, van Dommelen P, Schweizer JJ, Bakker B, Kist-van Holthe JE, Chinpaw JMM, et  
11  
12 294 al. Is mid-upper arm circumference in Dutch children useful in identifying obesity? *Arch Dis*  
13  
14 295 *Child*. 2019;104(2):159–165. doi: 10.1136/archdischild-2017-313528.  
15  
16  
17  
18 296 16. Roberfroid D, Hammami N, Lachat C, Weise Prinzo Z, Sibson V, Guesdon B, et al.  
19  
20 297 Utilization of mid-upper arm circumference versus weight-for-height in nutritional rehabilitation  
21  
22 298 programmes: asystematic review of evidence. Geneva, Switzerland: World Health Organization;  
23  
24 299 2013.  
25  
26  
27  
28 300 17. WHOMulticentre Growth Reference Study Group. WHO child growth standards based on  
29  
30 301 length/height, weight and age. *Acta Paediatr*. 2006; 450(Suppl.):76–85.  
31  
32  
33  
34 302 18. Veugelers PJ, Fitzgerald AL. Effectiveness of school programs in preventing childhood  
35  
36 303 obesity: a multilevel comparison. *Am J Pub Health*. 2005;95(3):432–435. doi:  
37  
38 304 10.2105/AJPH.2004.045898.  
39  
40  
41  
42 305 19. Ludwig J, Sanbonmatsu L, Gennetian L, Adam E, Duncan GJ, Katz LF, et al.  
43  
44 306 Neighborhoods, obesity, and diabetes—a randomized social experiment. *N Engl J*  
45  
46 307 *Med*. 2011;365:1509–1519. doi: 10.1056/NEJMs1103216.  
47  
48  
49  
50 308 20. Zenk SN, Powell LM, Rimkus L, Isgor Z, Barker DC, Ohri-Vachaspati P, et al. Relative and  
51  
52 309 absolute availability of healthier food and beverage alternatives across communities in the  
53  
54 310 United States. *Am J Public Health*. 2014;104(11):2170–2178. doi: 10.2105/AJPH.2014.302113.  
55  
56  
57  
58  
59  
60

- 1  
2  
3 311 21. Geserick M, Vogel M, Gausche R, Lipek T, Spielau U, Keller E, et al. Acceleration of BMI in  
4  
5 312 early childhood and risk of sustained obesity. *N Engl J Med*. 2018; 379:1303–1312. doi:  
6  
7 313 10.1056/NEJMoa1803527.  
8  
9  
10 314 22. UNICEF India. Stunting. December 2018. [Internet]. New Delhi, India: UNICEF. Available  
11  
12 315 from: <http://unicef.in/Whatwedo/10/Stunting>  
13  
14  
15  
16 316 23. Popkin BM, Richards MK, Montiero CA. Stunting is associated with overweight in children  
17  
18 317 in countries that are undergoing the nutrition transition. *J Nutr*. 1996; 126(12):3009–3016. doi:  
19  
20 318 10.1093/jn/126.12.3009.  
21  
22  
23  
24 319 24. Andreyeva T, Kelly IR, Harris JL. Exposure to food advertising on television: associations  
25  
26 320 with children's fast food and soft drink consumption and obesity. *Econ Hum Biol*.  
27  
28 321 2011;9(3):221–233. doi: 10.1016/j.ehb.2011.02.004. Epub 2011 Mar 5.  
29  
30  
31  
32 322 25. Kolčić I. Double burden of malnutrition: silent driver of double burden of disease in low-  
33  
34 323 and middle-income countries. *J Glob Health*. 2012;2(2):020303. doi: 10.7189/jogh.02.020303.  
35  
36  
37 324 26. Chan RSM, Woo J. Prevention of overweight and obesity: how effective is the current public  
38  
39 325 health approach. *Int J Environ Res Public Health*. 2010;7(3):765–783.  
40  
41 326 doi:10.3390/ijerph703076526.  
42  
43  
44  
45 327 27. Jaacks LM, Vandevijvere S, Pan A, McGowan CJ, Wallace C, Imamura F, et al. The obesity  
46  
47 328 transition: stages of the global epidemic. *Lancet Diabetes Endocrinol*. 2019. doi: 10.1016/S2213-  
48  
49 329 8587(19)30026-9.  
50  
51  
52 330  
53  
54 331  
55 332

**Table 1**

333 **Correlations between anthropometric parameters among girls (N=424)**

334

| Variables               |                     | MUAC      | Body weight (kg) | Height (cm) | BMI       |
|-------------------------|---------------------|-----------|------------------|-------------|-----------|
| <b>MUAC</b>             | Pearson Correlation | 1         | .897(**)         | .700(**)    | .826(**)  |
|                         | p-value             |           | 7.34E-152        | 1.21E-63    | 6.86E-107 |
| <b>Body weight (kg)</b> | Pearson Correlation | .897(**)  | 1                | .866(**)    | .776(**)  |
|                         | p-value             | 7.34E-152 |                  | 2.85E-129   | 1.93E-86  |
| <b>Height (cm)</b>      | Pearson Correlation | .700(**)  | .866(**)         | 1           | .385(**)  |
|                         | p-value             | 1.21E-63  | 2.85E-129        |             | 2.16E-16  |
| <b>BMI</b>              | Pearson Correlation | .826(**)  | .776(**)         | .385(**)    | 1         |
|                         | p-value             | 6.86E-107 | 1.93E-86         | 2.16E-16    |           |

335 \*\* Correlation is significant at the 0.01 level (2-tailed).

336 **Table 2**  
 337 **Correlations between anthropometric parameters among boys (N=1020)**  
 338

| Variables               |                     | MUAC      | Body weight (kg) | Height (cm) | BMI       |
|-------------------------|---------------------|-----------|------------------|-------------|-----------|
| <b>MUAC</b>             | Pearson Correlation | 1         | .911(**)         | .780(**)    | .847(**)  |
|                         | p-value             |           | 0.0001           | 9.60E-210   | 2.21E-281 |
| <b>Body weight (kg)</b> | Pearson Correlation | .911(**)  | 1                | .886(**)    | .861(**)  |
|                         | p-value             | 0.0001    |                  | 0.0001      | 1.25E-301 |
| <b>Height (cm)</b>      | Pearson Correlation | .780(**)  | .886(**)         | 1           | .564(**)  |
|                         | p-value             | 9.60E-210 | 0.0001           |             | 1.02E-86  |
| <b>BMI</b>              | Pearson Correlation | .847(**)  | .861(**)         | .564(**)    | 1         |
|                         | p-value             | 2.21E-281 | 1.25E-301        | 1.02E-86    |           |

339 \*\* Correlation is significant at the 0.01 level (2-tailed).

**Table 3**  
**Distribution of nutrition conditions based on BMI and MUAC Z-scores \*\***

| <b>Condition</b>                        | <b>Based on BMI Z-scores<br/>No (%)</b> | <b>Based on MUACZ-scores<br/>No (%)</b> |
|-----------------------------------------|-----------------------------------------|-----------------------------------------|
| <b>Pre-obese</b>                        | BMI >1 to 2 SD<br>136 (9.4%)            | MUAC>1to2SD<br>135 (9.3%)               |
| <b>Overweight</b>                       | BMI>2 to 3 SD<br>36 (2.5%)              | MUAC>2 to 3SD<br>43 (3.0%)              |
| <b>Obese</b>                            | BMI >3SD<br>21 (1.5%)                   | MUAC>3SD<br>19(1.3%)                    |
| <b>Possible risk of<br/>underweight</b> | BMI <-1 to -2 SD<br>141 (9.8%)          | MUAC ≤ -1 to -2SD<br>181 (12.5%)        |
| <b>Thin</b>                             | BMI <-2 to -3 SD<br>5 (0.3%)            | MUAC<-2 to -3SD<br>6 (0.4%)             |
| <b>Severely thin</b>                    | BMI <-3SD<br>5 (0.3%)                   | MUAC<-3 SD<br>1(0.1%)                   |

\*\*Modified WHO Classification of nutrition conditions based on anthropometry  
 BMI = Body Mass Index; MUAC = Mid-upper-arm circumference

1  
2  
3  
4  
5  
6  
7  
8  
9  
10  
11  
12  
13  
14  
15  
16  
17  
18  
19  
20  
21  
22  
23  
24  
25  
26  
27  
28  
29  
30  
31  
32  
33  
34  
35  
36  
37  
38  
39  
40  
41  
42  
43  
44  
45  
46  
47  
48  
49  
50  
51  
52  
53  
54  
55  
56  
57  
58  
59  
60



215x279mm (300 x 300 DPI)

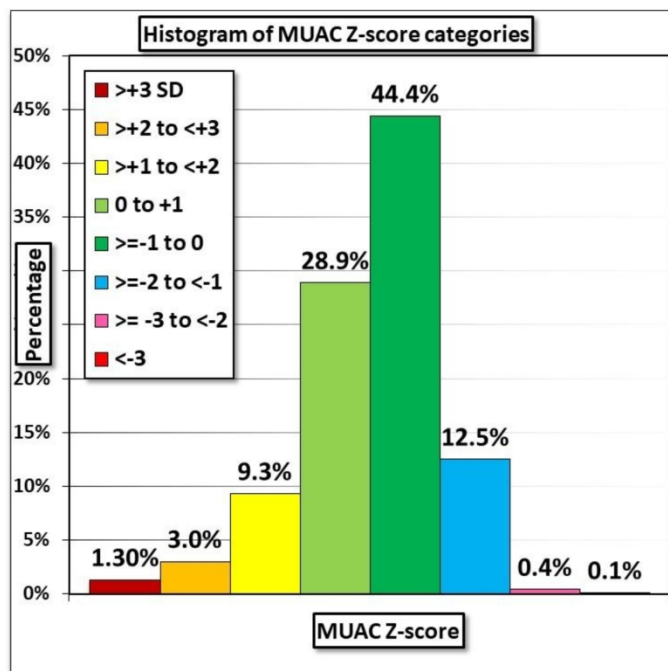

215x279mm (300 x 300 DPI)



**Table 1 (S)**  
**Comparison of variables between girls and boys**

| Variables ^             | Girls (n=424) |       |        |       | Boys (n=1020) |       |        |       | Mann-Whitney Test |                   |
|-------------------------|---------------|-------|--------|-------|---------------|-------|--------|-------|-------------------|-------------------|
|                         | Mean          | SD    | Median | IQR   | Mean          | SD    | Median | IQR   | Z-value           | p-value           |
| <b>Age (years)</b>      | 7.63          | 2.82  | 7.00   | 5.00  | 8.80          | 3.69  | 9.00   | 5.00  | -5.162            | <b>2.44E-07 *</b> |
| <b>Height (cm)</b>      | 125.16        | 16.95 | 125.00 | 26.00 | 134.06        | 22.16 | 133.15 | 34.00 | -6.626            | <b>3.44E-11 *</b> |
| <b>Body weight (kg)</b> | 22.48         | 8.83  | 20.20  | 10.40 | 28.93         | 14.96 | 24.20  | 19.40 | -7.215            | <b>5.41E-13 *</b> |
| <b>BMI</b>              | 13.84         | 2.33  | 13.20  | 2.14  | 15.04         | 3.31  | 13.98  | 3.24  | -7.374            | <b>1.66E-13 *</b> |
| <b>MUAC</b>             | 17.52         | 2.61  | 16.85  | 3.30  | 18.94         | 3.83  | 17.95  | 5.00  | -6.233            | <b>4.59E-10 *</b> |

^ All data failed a "Normality Test," so a Mann-Whitney U Rank Sum Test was applied.

\* Difference is statistically significant.

BMI=Body Mass Index; MUAC=Mid-upper-arm circumference

**Table 2 (S)**  
**Distribution of variables among all participants**

| <b>Variables</b>        | <b>Mean</b> | <b>SD</b> | <b>Median</b> | <b>IQR</b> | <b>Minimum</b> | <b>Maximum</b> |
|-------------------------|-------------|-----------|---------------|------------|----------------|----------------|
| <b>Age (years)</b>      | 8.46        | 3.50      | 9.00          | 6.00       | 3.00           | 16.00          |
| <b>Body weight (kg)</b> | 27.04       | 13.77     | 23.10         | 16.20      | 9.00           | 97.50          |
| <b>Height (cm)</b>      | 131.45      | 21.16     | 130.00        | 32.00      | 84.00          | 188.00         |
| <b>Height (meters)</b>  | 1.31        | 0.21      | 1.30          | 0.32       | 0.84           | 1.88           |
| <b>BMI</b>              | 14.69       | 3.10      | 13.78         | 2.89       | 6.58           | 36.10          |
| <b>MUAC</b>             | 18.53       | 3.57      | 17.50         | 4.30       | 12.20          | 35.00          |

SD = standard deviation; IQR = inter-quartile range; BMI = Body Mass Index; MUAC = Mid-upper-arm circumference

**Table 3 (S)**  
**Age-wise distribution of BMI among all participants**

| Age (years) | BMI   |      |        |       |
|-------------|-------|------|--------|-------|
|             | Mean  | SD   | Median | IQR   |
| <b>3</b>    | 13.37 | 1.34 | 13.26  | 1.61  |
| <b>4</b>    | 13.04 | 1.69 | 13.07  | 1.46  |
| <b>5</b>    | 13.01 | 1.13 | 12.80  | 1.02  |
| <b>6</b>    | 13.85 | 2.09 | 13.39  | 1.55  |
| <b>7</b>    | 13.54 | 1.48 | 13.20  | 1.90  |
| <b>8</b>    | 13.94 | 2.22 | 13.37  | 2.01  |
| <b>9</b>    | 13.70 | 1.73 | 13.36  | 1.66  |
| <b>10</b>   | 14.74 | 2.84 | 13.97  | 2.77  |
| <b>11</b>   | 15.48 | 3.03 | 14.89  | 3.60  |
| <b>12</b>   | 15.89 | 3.01 | 15.63  | 3.87  |
| <b>13</b>   | 18.22 | 3.34 | 17.51  | 3.30  |
| <b>14</b>   | 18.33 | 3.88 | 17.28  | 4.53  |
| <b>15</b>   | 19.09 | 4.32 | 18.01  | 6.52  |
| <b>16</b>   | 21.38 | 5.89 | 23.55  | 11.09 |

SD = standard deviation; IQR = inter-quartile range

**Table 4 (S)**  
**Age-wise distribution of MUAC among all participants**

| Age (years) | MUAC  |      |        |      |
|-------------|-------|------|--------|------|
|             | Mean  | SD   | Median | IQR  |
| <b>3</b>    | 15.39 | 1.24 | 15.20  | 1.50 |
| <b>4</b>    | 15.50 | 1.16 | 15.50  | 1.10 |
| <b>5</b>    | 16.19 | 1.17 | 15.95  | 1.20 |
| <b>6</b>    | 16.83 | 2.07 | 16.50  | 1.95 |
| <b>7</b>    | 16.98 | 1.75 | 16.70  | 2.00 |
| <b>8</b>    | 17.97 | 2.11 | 17.50  | 1.61 |
| <b>9</b>    | 17.79 | 1.78 | 17.50  | 2.08 |
| <b>10</b>   | 19.02 | 2.63 | 18.50  | 3.45 |
| <b>11</b>   | 20.16 | 3.04 | 19.50  | 3.93 |
| <b>12</b>   | 20.87 | 2.79 | 20.50  | 4.00 |
| <b>13</b>   | 22.91 | 2.79 | 22.50  | 2.60 |
| <b>14</b>   | 23.53 | 3.64 | 23.00  | 4.95 |
| <b>15</b>   | 24.66 | 3.73 | 23.50  | 5.23 |
| <b>16</b>   | 25.81 | 4.63 | 27.20  | 7.75 |

SD = standard deviation; IQR = inter-quartile range

**Table 5 (S)**  
**Homogeneous Subsets: BMI: Tukey HSD**

| Age (years) | No. | Subset for alpha = 0.05 |        |        |        |        |        |
|-------------|-----|-------------------------|--------|--------|--------|--------|--------|
|             |     | 1                       | 2      | 3      | 4      | 5      | 6      |
| 5           | 132 | 13.011                  |        |        |        |        |        |
| 4           | 146 | 13.038                  |        |        |        |        |        |
| 3           | 102 | 13.366                  | 13.366 |        |        |        |        |
| 7           | 156 | 13.537                  | 13.537 |        |        |        |        |
| 9           | 72  | 13.696                  | 13.696 |        |        |        |        |
| 6           | 109 | 13.852                  | 13.852 | 13.852 |        |        |        |
| 8           | 65  | 13.939                  | 13.939 | 13.939 |        |        |        |
| 10          | 220 |                         | 14.740 | 14.740 | 14.740 |        |        |
| 11          | 182 |                         |        | 15.481 | 15.481 |        |        |
| 12          | 77  |                         |        |        | 15.892 |        |        |
| 13          | 30  |                         |        |        |        | 18.224 |        |
| 14          | 72  |                         |        |        |        | 18.325 |        |
| 15          | 72  |                         |        |        |        | 19.094 |        |
| 16          | 9   |                         |        |        |        |        | 21.380 |
| <b>Sig.</b> |     | 0.836                   | 0.232  | 0.059  | 0.529  | 0.892  | 1.000  |

Means for groups in homogeneous subsets are displayed.  
 BMI = Body Mass Index

**Table 6 (S)**  
**Homogeneous Subsets: MUAC: Tukey HSD (Table No. 4)**

| Age (years) | No. | Subset for alpha = 0.05 |        |        |        |        |        |        |        |        |
|-------------|-----|-------------------------|--------|--------|--------|--------|--------|--------|--------|--------|
|             |     | 1                       | 2      | 3      | 4      | 5      | 6      | 7      | 8      | 9      |
| 3           | 102 | 15.385                  |        |        |        |        |        |        |        |        |
| 4           | 146 | 15.500                  | 15.500 |        |        |        |        |        |        |        |
| 5           | 132 | 16.194                  | 16.194 |        |        |        |        |        |        |        |
| 6           | 109 | 16.826                  | 16.826 | 16.826 |        |        |        |        |        |        |
| 7           | 156 |                         | 16.979 | 16.979 |        |        |        |        |        |        |
| 9           | 72  |                         |        | 17.794 | 17.794 |        |        |        |        |        |
| 8           | 65  |                         |        | 17.972 | 17.972 |        |        |        |        |        |
| 10          | 220 |                         |        |        | 19.015 | 19.015 |        |        |        |        |
| 11          | 182 |                         |        |        |        | 20.161 | 20.161 |        |        |        |
| 12          | 77  |                         |        |        |        |        | 20.871 |        |        |        |
| 13          | 30  |                         |        |        |        |        |        | 22.907 |        |        |
| 14          | 72  |                         |        |        |        |        |        | 23.532 | 23.532 |        |
| 15          | 72  |                         |        |        |        |        |        |        | 24.658 | 24.658 |
| 16          | 9   |                         |        |        |        |        |        |        |        | 25.811 |
| <b>Sig.</b> |     | 0.102                   | 0.08   | 0.421  | 0.314  | 0.423  | 0.961  | 0.987  | 0.452  | 0.412  |

Means for groups in homogeneous subsets are displayed.

MUAC = Mid-upper-arm circumference

**Table 7 (S)**  
**Association among the cases between BMI (Z-Score) internally and by gender**

| Internal BMI (Z-Score)    |     | Gender |        | Total  |
|---------------------------|-----|--------|--------|--------|
|                           |     | Female | Male   |        |
| >+3 (Obese)               | No. | 5      | 16     | 21     |
|                           | %   | 1.2%   | 1.6%   | 1.5%   |
| >+2 to <+3 (Overweight)   | No. | 11     | 25     | 36     |
|                           | %   | 2.6%   | 2.5%   | 2.5%   |
| >+1 to <+2 (Pre-obese)    | No. | 47     | 89     | 136    |
|                           | %   | 11.1%  | 8.7%   | 9.4%   |
| 0 to +1 ^ (Normal)        | No. | 109    | 282    | 391    |
|                           | %   | 25.7%  | 27.6%  | 27.1%  |
| >=-1 to 0 ^ (Normal)      | No. | 209    | 500    | 709    |
|                           | %   | 49.3%  | 49.0%  | 49.1%  |
| >=-2 to <-1 ^ (ROU**)     | No. | 39     | 102    | 141    |
|                           | %   | 9.2%   | 10.0%  | 9.8%   |
| >= -3 to <-2 ^ MAM (Thin) | No. | 3      | 2      | 5      |
|                           | %   | 0.7%   | 0.2%   | 0.3%   |
| <-3 ^ SAM (Severely thin) | No. | 1      | 4      | 5      |
|                           | %   | 0.2%   | 0.4%   | 0.3%   |
| Total                     | No. | 424    | 1020   | 1444   |
|                           | %   | 100.0% | 100.0% | 100.0% |

BMI = Body Mass Index. ROU= Risk of underweight. MAM= Moderate acute malnutrition. SAM= Severe acute malnutrition

**Table 8 (S)**  
**Association among the cases between MUAC (Z-Score) internally and by gender**

| Internal MUAC (Z-Score) |     | Gender |        | Total  |
|-------------------------|-----|--------|--------|--------|
|                         |     | Female | Male   |        |
| >+3 SD (Obese)          | No. | 3      | 16     | 19     |
|                         | %   | 0.7%   | 1.6%   | 1.3%   |
| >+2 to <+3 (Overweight) | No. | 17     | 26     | 43     |
|                         | %   | 4.0%   | 2.5%   | 3.0%   |
| >+1 to <+2 (Pre-obese)  | No. | 38     | 97     | 135    |
|                         | %   | 9.0%   | 9.5%   | 9.3%   |
| 0 to +1 ^ (Normal)      | No. | 131    | 287    | 418    |
|                         | %   | 30.9%  | 28.1%  | 28.9%  |
| >=-1 to 0 ^ (Normal)    | No. | 178    | 463    | 641    |
|                         | %   | 42.0%  | 45.4%  | 44.4%  |
| >=-2 to <-1 ^ (ROU)     | No. | 55     | 126    | 181    |
|                         | %   | 13.0%  | 12.4%  | 12.5%  |
| >= -3 to <-2 ^ (MAM)    | No. | 2      | 4      | 6      |
|                         | %   | 0.5%   | 0.4%   | 0.4%   |
| <-3 ^ (SAM)             | No. | 0      | 1      | 1      |
|                         | %   | 0.0%   | 0.1%   | 0.1%   |
| Total                   | No. | 424    | 1020   | 1444   |
|                         | %   | 100.0% | 100.0% | 100.0% |

MUAC = Mid-upper-arm circumference. ROU= Risk of underweight. MAM= Moderate acute malnutrition. SAM= Severe acute malnutrition



# BMJ Paediatrics Open

## **Double burden of malnutrition among Indian school children and its measurement: A cross-sectional study in a single school**

**Short title: Measuring double burden of malnutrition**

|                               |                                                                                                                                                                                                                                     |
|-------------------------------|-------------------------------------------------------------------------------------------------------------------------------------------------------------------------------------------------------------------------------------|
| Journal:                      | <i>BMJ Paediatrics Open</i>                                                                                                                                                                                                         |
| Manuscript ID                 | bmjpo-2019-000505.R4                                                                                                                                                                                                                |
| Article Type:                 | Original research                                                                                                                                                                                                                   |
| Date Submitted by the Author: | 02-Dec-2019                                                                                                                                                                                                                         |
| Complete List of Authors:     | Daga, Subhashchandra; Pacific Medical College and Hospital, Pediatrics Mhatre, Sameer; Smt Kashibai Navale Medical College and General Hospital, Paediatrics Kasbe, Abhiram ; Topiwala National Medical College DSouza, Eric; MIMER |
| Keywords:                     | General Paediatrics, Obesity, School Health, Tropical Paediatrics, Growth                                                                                                                                                           |
|                               |                                                                                                                                                                                                                                     |

SCHOLARONE™  
Manuscripts

1  
2  
3  
4 1  
5  
6  
7 2 Double burden of malnutrition among Indian school children and its  
8  
9  
10 3 measurement: A cross-sectional study in a single school  
11  
12  
13

14 4 Short title: Measuring double burden of malnutrition  
15  
16  
17 5  
18  
19

20 6 Subhashchandra Daga<sup>1\*</sup>, Sameer Mhatre<sup>2</sup>, Eric Dsouza<sup>3</sup>, Abhiram Kasbe<sup>4</sup>  
21  
22  
23  
24 7

25  
26 8 <sup>1</sup>Department of Pediatrics, Pacific Medical College and Hospital, Udaipur, India  
27  
28

29  
30 9 <sup>2</sup>Department of Pediatrics, Smt. KashibaiNavle Medical College, Pune, India  
31  
32

33 10 <sup>3</sup>Department of Pediatrics, MIMER Medical College, Talegaon, India  
34  
35

36 11 <sup>4</sup>Department of Pediatrics, Topiwala Medical College, Mumbai, India  
37  
38

39 12  
40  
41

42 13  
43  
44

45 14 \*Corresponding author  
46  
47

48 15 E-mail: [dagasubhash49@gmail.com](mailto:dagasubhash49@gmail.com) (SD)  
49  
50

51 16 Tel: +91-9960522259  
52  
53  
54

55 17  
56  
57

## 18 **Abstract**

### 19 **Objective**

20 This cross-sectional study set in a single school on the outskirts of a large city aimed to  
21 document the extent of double burden of malnutrition (coexistence of over- and under-nutrition)  
22 among Indian schoolchildren from lower socioeconomic groups, and to determine if mid-upper  
23 arm circumference (MUAC) can be used as a proxy for body mass index (BMI).

### 24 **Subjects**

25 The total number of participants was 1,444, comprising 424 girls and 1,020 boys belonging to  
26 playgroups and grades 1–7.

### 27 **Measurements**

28 Anthropometric measurements, such as participants' MUAC, height, and weight were measured  
29 using standard techniques. Descriptive statistics for BMI and MUAC were obtained based on  
30 gender; Z-scores were computed using age-specific and sex-specific WHO reference data. The  
31 distribution of variables was calculated for three groups: girls, boys, and all participants.  
32 Homogeneous subsets for BMI and MUAC were identified in the three groups. Age-wise  
33 comparisons of BMI and MUAC were conducted for each gender.

### 34 **Main outcome measures**

- 35 1. To know if MUAC and BMI are correlated among boys and girls.
- 36 2. To study BMI and MUAC Z score distribution among the participants.

## 37 Results

38 MUAC was positively correlated with BMI in both boys and girls. The following BMI Z-score  
39 distribution was observed: severe acute malnutrition (SAM), 5(0.3%); moderate acute  
40 malnutrition (MAM), 146 (10.1%); undernourished, at risk of MAM/SAM, 141 (9.8%); obese,  
41 21 (1.5%); overweight, 36 (2.5%); pre-obese, 136 (9.4%). The distribution of categories of  
42 children based on MUAC Z-scores was: SAM, 7(0.5%), MAM, 181 (12.5%), and  
43 undernourished at risk of MAM or SAM, 181 (12.5%); obese, 19 (1.3%), overweight, 178  
44 (12.3%), pre-obese, 135 (9.3%).

## 45 Conclusions

46 SAM/MAM/undernourished states and obesity/overweight/pre-obese states, indicating  
47 undernutrition more than overweight, coexist among Indian schoolchildren from lower  
48 middle/lower socioeconomic categories. BMI and MUAC were significantly correlated. MUAC  
49 identifies both under-nutrition and over-nutrition by early detection of aberrant growth.

## 51 Introduction

52 The double burden of under-nutrition and over-nutrition is an emerging international  
53 problem. According to estimates from 129 countries with available data, 57 experience serious  
54 problems of both undernourished children and overweight adults [1]. The relationship between  
55 under-nutrition and overweight status and obesity is deeper than coexistence. The double burden  
56 of malnutrition (DBM) refers to the coexistence of both under-nutrition and over-nutrition within  
57 individuals, households, and populations and across the life course. “Across the life course”

1  
2  
3 58 refers to the phenomenon that under-nutrition early in life contributes to an increased propensity  
4  
5 59 for over-nutrition during adulthood [2]. The occurrence of DBM is attributed to a complex  
6  
7 60 interplay of nutritional transitions (shifting from an active to a sedentary lifestyle, demographic  
8  
9 61 transitions, etc.) from high fertility and early deaths to low fertility and aging populations and  
10  
11 62 epidemiological transitions from communicable to non-communicable diseases [2].  
12  
13  
14  
15

16 63 Later in the life course, the double burden of disease is characterized by the coexistence  
17  
18 64 of communicable (infectious disease) and non-communicable diseases. Prior to the 1970s,  
19  
20 65 obesity was a relatively rare condition, even in the wealthiest of nations [3], whereas under-  
21  
22 66 nutrition was a major problem, and nutrition supplementation was the main intervention. Thus,  
23  
24 67 obesity is a relatively new problem in need of attention. A systematic review of obesity and  
25  
26 68 socioeconomic status in low and middle income countries concluded that child obesity is more  
27  
28 69 prevalent among affluent groups in such countries [4]. This may be attributed to improved access  
29  
30 70 to surplus/excess food and a higher degree of urbanization and technological progress in these  
31  
32 71 economies that render activities less laborious, resulting in less energy expenditure [5].  
33  
34 72 Furthermore, childhood obesity is a strong predictor of adult obesity. For instance, a Japanese  
35  
36 73 study revealed that approximately one-third of obese children grew into obese adults  
37  
38 74 [6]. Therefore, early detection of excessive weight gain, and action to prevent its progress,  
39  
40 75 is more likely to succeed than attempting to reverse obesity later.  
41  
42  
43  
44  
45  
46

47 76 Body mass index (BMI)-for-age, the internationally recommended measure of obesity,  
48  
49 77 suggests that Asians are at an increased risk of cardio-metabolic disorders, even at lower BMI  
50  
51 78 levels, because of a considerably higher body fat percentage [7]. Therefore, the World Health  
52  
53 79 Organization (WHO) recommends lowering the BMI cut-offs for being considered “overweight”  
54  
55  
56  
57  
58  
59  
60

1  
2  
3 80 among Asian adults [8] in light of the increased health risks. Early detection of overweight status  
4  
5 81 has become very important in Asia.  
6  
7

8 82 The selection of height-based parameters, such as BMI for the detection of  
9  
10 83 overweight/obese children in low-resource settings, has limitations because of the shortage of  
11  
12 84 stadiometers and trained paramedical staff. A simpler proxy for BMI that parallels the use of  
13  
14 85 abdominal girth for detecting visceral obesity needs to be developed [9]. The mid-upper arm  
15  
16 86 circumference (MUAC) appears to be a promising alternative in this regard [10–14]. A recent  
17  
18 87 study from the Netherlands reaffirmed that, compared with BMI, MUAC is a valid measure for  
19  
20 88 detecting overweight/obesity, and thus is a good alternative to BMI [15]. Health workers are  
21  
22 89 familiar with MUAC measurement, as it has been commonly used for identifying severe acute  
23  
24 90 under-nutrition among young (6–60 months of age) children [16].  
25  
26  
27  
28  
29

30 91 To our knowledge, few studies have focused on the coexistence of under- and over-  
31  
32 92 nutrition in India. The present study was conducted to document the extent of DBM among  
33  
34 93 Indian schoolchildren, a key group for intervention, using BMI and MUAC distributions. The  
35  
36 94 study also examined whether MUAC can be used as a proxy for BMI, so that MUAC can detect  
37  
38 95 trends toward obesity or severe acute malnutrition (SAM).  
39  
40  
41  
42

## 43 96 **Participants and Methods**

### 44 45 46 97 **Setting**

47  
48  
49 98 A single school cross-sectional study was conducted with schoolchildren from the  
50  
51 99 outskirts of Pune, India. This study was part of the MIMER medical college and hospital's  
52  
53 100 outreach activities regarding annual school health check-ups. A schedule of class-wise health  
54  
55  
56  
57  
58  
59  
60

1  
2  
3 101 check-ups was developed in consultation with the school authorities who, in turn, sought parents'  
4  
5 102 permission. The study had the approval of the ethics committee of MIMER medical college and  
6  
7 103 hospital, Talegaon Dabhade. A majority of the children belonged to lower and lower-middle  
8  
9 104 socioeconomic categories. Children between 3 and 5 years were from a playgroup, and those  
10  
11 105 between 6 and 12 years belonged to grades 1–7.  
12  
13  
14  
15

### 16 106 **Anthropometric measurements**

17  
18  
19 107 Anthropometric measurements, such as MUAC, height, and weight, were taken from  
20  
21 108 each participant using standard techniques. Height (cm) was measured on a stadiometer (Easy  
22  
23 109 Care) without shoes. Weight (kg) was measured using a digital weighing machine (Meditrin  
24  
25 110 Instruments) in light clothes and without shoes. MUAC (cm) was measured using a non-elastic  
26  
27 111 plastic tape at the midway between the olecranon and acromion processes on the upper left arm.  
28  
29 112 During these measurements, the participant was in a comfortable standing position and was  
30  
31 113 asked to look straight ahead with his/her shoulders in a neutral position. The participant's arm  
32  
33 114 was straightened, and we ensured that the tape was neither too tight nor too loose.  
34  
35  
36  
37  
38

### 39 115 **Statistical tools**

40  
41 116 Open Source Statistical Software PSPP version 1.0.1 was used for all analyses, and a p-  
42  
43 117 value  $\leq 0.05$  was considered statistically significant. Mean and standard deviation (SD), median,  
44  
45 118 inter-quartile range, and Z-scores for BMI and MUAC were computed by sex for participants  
46  
47 119 with complete measurements. Z-scores were computed using age-specific and sex-specific  
48  
49 120 reference data from the WHO [17]. The distribution of variables was calculated among all  
50  
51 121 participants together and separately for boys and girls. Homogeneous subsets for BMI and  
52  
53  
54  
55  
56  
57  
58  
59  
60

1  
2  
3 122 MUAC were identified in these three groups. Age-wise comparisons of BMI and MUAC were  
4  
5 123 calculated for both girls and boys.  
6  
7

#### 8 124 **Patient involvement**

9

10  
11 125 Patients were not directly involved in the design of this study.  
12  
13

### 14 126 **Results**

15  
16  
17

18 127 The total number of participants was 1,444, comprising 424 girls and 1,020 boys. The  
19  
20 128 distribution of Z- scores among all participants is shown in Figures 1 and 2. Age, height, weight,  
21  
22 129 MUAC, and BMI were all significantly different between girls and boys; boys had higher values  
23  
24 130 for all parameters (**Suppl. Files: Tables 1 (S) and 2 (S)**). As expected, BMI and MUAC showed  
25  
26 131 age-wise differences for all participants, combined and separately, for boys and girls, between  
27  
28 132 the ages of 3 to 16 years (**Suppl. Files: Tables 3 (S) and 4 (S)**). Tukey's honest significant  
29  
30 133 difference (HSD) test for homogeneous subsets revealed a significant shift in mean BMI at 3, 6,  
31  
32 134 and 10 years (**Suppl. Files: Table 5 (S)**), whereas for MUAC, the shift occurred at 4, 6, and 9  
33  
34 135 years (**Suppl. Files: Table 6 (S)**). Thereafter, MUAC changed significantly almost every year  
35  
36 136 until the age of 16. Thus, in contrast to BMI, MUAC had more age-dependent variability. BMI  
37  
38 137 change with age was minimal in girls (only at age 14) compared to changes in boys at 6, 10,  
39  
40 138 12, and 14 years. Girls had six homogeneous subsets for MUAC, with the first significant rise at  
41  
42 139 age 4 years, compared to nine subsets in boys, with the first shift at age 5. Thus, changes in BMI  
43  
44 140 and MUAC were more frequent in boys. MUAC was associated with weight, height, and BMI  
45  
46  
47  
48  
49  
50 141 both in girls and boys (Tables 1 and 2).  
51  
52  
53

54 142  
55  
56  
57  
58  
59  
60



1  
2  
3 143  
4 144 **Table 1**  
5 145 **Correlations between anthropometric parameters among girls (N=424)**  
6 146  
7

| Variables               |                     | MUAC      | Body weight (kg) | Height (cm) | BMI       |
|-------------------------|---------------------|-----------|------------------|-------------|-----------|
| <b>MUAC</b>             | Pearson Correlation | 1         | .897(**)         | .700(**)    | .826(**)  |
|                         | <i>p</i> -value     |           | 7.34E-152        | 1.21E-63    | 6.86E-107 |
| <b>Body weight (kg)</b> | Pearson Correlation | .897(**)  | 1                | .866(**)    | .776(**)  |
|                         | <i>p</i> -value     | 7.34E-152 |                  | 2.85E-129   | 1.93E-86  |
| <b>Height (cm)</b>      | Pearson Correlation | .700(**)  | .866(**)         | 1           | .385(**)  |
|                         | <i>p</i> -value     | 1.21E-63  | 2.85E-129        |             | 2.16E-16  |
| <b>BMI</b>              | Pearson Correlation | .826(**)  | .776(**)         | .385(**)    | 1         |
|                         | <i>p</i> -value     | 6.86E-107 | 1.93E-86         | 2.16E-16    |           |

28  
29 147 \*\* Correlation is significant at the 0.01 level (2-tailed).  
30  
31  
32 148  
33  
34  
35 149  
36  
37  
38  
39 150  
40  
41  
42 151  
43  
44  
45  
46 152  
47  
48  
49 153  
50  
51  
52  
53 154  
54  
55  
56  
57  
58  
59  
60

155

156 **Table 2**157 **Correlations between anthropometric parameters among boys (N=1020)**

158

| Variables               |                     | MUAC      | Body weight (kg) | Height (cm) | BMI       |
|-------------------------|---------------------|-----------|------------------|-------------|-----------|
| <b>MUAC</b>             | Pearson Correlation | 1         | .911(**)         | .780(**)    | .847(**)  |
|                         | <i>p</i> -value     |           | 0.0001           | 9.60E-210   | 2.21E-281 |
| <b>Body weight (kg)</b> | Pearson Correlation | .911(**)  | 1                | .886(**)    | .861(**)  |
|                         | <i>p</i> -value     | 0.0001    |                  | 0.0001      | 1.25E-301 |
| <b>Height (cm)</b>      | Pearson Correlation | .780(**)  | .886(**)         | 1           | .564(**)  |
|                         | <i>p</i> -value     | 9.60E-210 | 0.0001           |             | 1.02E-86  |
| <b>BMI</b>              | Pearson Correlation | .847(**)  | .861(**)         | .564(**)    | 1         |
|                         | <i>p</i> -value     | 2.21E-281 | 1.25E-301        | 1.02E-86    |           |

159 \*\* Correlation is significant at the 0.01 level (2-tailed).

160 The distribution of clinical categories of nutritional status with respect to BMI and

161 MUAC is shown in Table 3.

162 **Table 3**163 **Distribution of nutrition conditions based on BMI and MUAC Z-scores \*\***

164

| Condition         | Based on BMI Z-scores<br>No (%) | Based on MUAC Z-scores<br>No (%) |
|-------------------|---------------------------------|----------------------------------|
| <b>Pre-obese</b>  | BMI >1 to 2 SD<br>136 (9.4%)    | MUAC >1 to 2 SD<br>135 (9.3%)    |
| <b>Overweight</b> | BMI >2 to 3 SD<br>36 (2.5%)     | MUAC >2 to 3 SD<br>43 (3.0%)     |

|                                         |                                |                                  |
|-----------------------------------------|--------------------------------|----------------------------------|
| <b>Obese</b>                            | BMI >3SD<br>21 (1.5%)          | MUAC>3SD<br>19(1.3%)             |
| <b>Possible risk of<br/>underweight</b> | BMI <-1 to -2 SD<br>141 (9.8%) | MUAC ≤ -1 to -2SD<br>181 (12.5%) |
| <b>Thin</b>                             | BMI <-2 to -3 SD<br>5 (0.3%)   | MUAC<-2 to -3SD<br>6 (0.4%)      |
| <b>Severely thin</b>                    | BMI <-3SD<br>5 (0.3%)          | MUAC<-3 SD<br>1(0.1%)            |

165 \*\*Modified WHO Classification of nutrition conditions based on anthropometry  
166 BMI = Body Mass Index; MUAC = Mid-upper-arm circumference

167

## 168 Discussion

169 The present study suggests that DBM has reached Indian school children of lower middle  
170 or lower socioeconomic statuses, which calls for urgent action. Importantly, the present results  
171 identify children at the brink of sliding into severe forms of under- and over-nutrition. The  
172 present study also suggests using a single and simpler method, MUAC, for detecting both forms  
173 of malnutrition by monitoring growth during routine health check-ups.

174 The World Health Assembly targets were considered in crafting the 2030 development  
175 agenda and are referred to in target 2.2 of the Sustainable Development Goals to “end all forms  
176 of malnutrition.” The reference to “all forms of malnutrition” is important for acknowledging the  
177 existence of the double burden of under-nutrition and overweight status. While the drivers of the  
178 double burden of malnutrition are varied and often insidious, their effects present a clear case for  
179 urgent action and demand an integrated response. Using a single tool for detecting both forms of  
180 malnutrition integrates and simplifies the process.

1  
2  
3 181 To our knowledge, few studies have focused on this aspect of growth among children in  
4  
5 182 India, as well as other emerging economies. The girls were outnumbered by boys (424 vs.  
6  
7 183 1,020). This may be due to the traditional gender norms that push girls into helping with  
8  
9 184 household chores and sibling care, resulting in school dropouts. Based on BMI Z-Scores, 5  
10  
11 185 (0.3%) and 5 (0.3%) belonged to SAM and MAM categories, respectively, and 21(1.5%) and 36  
12  
13 186 (3.9%) children were classified as obese and overweight, respectively. MUAC Z-scores  
14  
15 187 suggested the following distribution: SAM -1(0.1%), MAM-(0.4%), obesity-19 (1.3%),  
16  
17 188 overweight-43 (4.3%).An even greater number of children were leaning toward SAM or MAM  
18  
19 189 as well as obesity or overweight. Children who are not yet at the BMI-for-age threshold for the  
20  
21 190 current definition of SAM or MAM (and childhood obesity or overweight) may be at an  
22  
23 191 increased risk of developing severe forms of under-nutrition or obesity. One of the present  
24  
25 192 study's aims was to identify these target groups so that these children's needs could be  
26  
27 193 addressed.  
28  
29  
30  
31  
32  
33

34 194 The first target group, undernourished children (BMI or MUACZ-score between -1 and -  
35  
36 195 2 SD), is at risk of sliding into MAM or SAM. The second group, pre-obese children (BMI or  
37  
38 196 MUACZ-score between 1 and 2 SD), is at risk of progressing to overweight/obesity. Based on  
39  
40 197 the BMI Z-scores, 181 (12.5%) were undernourished, and 136 (9.4%) were pre-obese. The  
41  
42 198 equivalent numbers for MUAC were 181 (12.5%) for SAM and MAM risk and 135 (9.3%) for  
43  
44 199 obesity, respectively. More children were at risk of severe undernutrition than of overnutrition.  
45  
46 200 These target groups may develop more severe forms of malnutrition if corrective measures are  
47  
48 201 delayed. The first step in that direction is to plan face-to-face counseling sessions with parents  
49  
50 202 and children. School programs are effective at preventing childhood obesity by fostering more  
51  
52 203 physical activities and recommending healthier diets [18]. Counseling for the target groups will  
53  
54  
55  
56  
57  
58  
59  
60

1  
2  
3 204 have to be done, keeping in mind that within low-resource settings, places for play may be  
4  
5 205 scarce, sports infrastructure may be poor, and recreational centers may be lacking [19].  
6  
7  
8 206 Similarly, low family income is linked to greater consumption of low-quality nutrition and fast  
9  
10 207 food [20].

11  
12  
13 208 Importantly, MUAC as a single tool can facilitate this cohesive intervention by detecting  
14  
15 209 both under and over-nutrition during routine growth monitoring without a height-dependent  
16  
17 210 parameter, such as BMI (Figure1). This is because BMI and MUAC are significantly correlated  
18  
19 211 with each other. However, monitoring for obesity should begin even earlier, as the most rapid  
20  
21 212 weight gain occurs between ages 2 and 6 years among obese adolescents [21].  
22  
23  
24  
25

26 213 While India's economy has been growing at an impressive rate, the country still has the  
27  
28 214 highest number of stunted children in the world (46.8 million), representing one-third of the  
29  
30 215 global total of stunted children under age 5 [22]. Stunting is associated with being overweight  
31  
32 216 among children in countries that are undergoing a nutritional transition [23]. Economic  
33  
34 217 improvements are accompanied by a conspicuous change in dietary patterns in the form of  
35  
36 218 increased fat intake [5] compounded by exposure to food advertising on television leading to fast  
37  
38 219 food and soft drink consumption and obesity [24]. This, coupled with low physical activity,  
39  
40 220 contributes to an increasing prevalence of obesity among adults, which accompanies the first  
41  
42 221 wave of a cluster of non-communicable diseases, such as hypertension and diabetes mellitus,  
43  
44 222 called "the new world syndrome" [25]. It should be noted, however, that there has not been the  
45  
46 223 same level of agreement on the classification of obesity for children and adolescents as there is  
47  
48 224 for adults [26].  
49  
50  
51  
52  
53  
54  
55  
56  
57  
58  
59  
60

1  
2  
3 225 To summarize, until recently, India has considered under-nutrition to be a major problem,  
4  
5 226 and nutrition supplementation has been the key intervention. At the national level, India is at  
6  
7  
8 227 stage 1 of the obesity transition with wide sub-national variations [27]. Our study may help in the  
9  
10 228 surveillance effort to address underserved populations [27]. With improved availability of food, a  
11  
12 229 double burden of malnutrition is emerging that needs to be concurrently addressed. The present  
13  
14 230 study observed the coexistence of obesity, overweight, pre-obese, and SAM, MAM, and  
15  
16 231 undernourished states among Indian school children in lower-middle and lower socioeconomic  
17  
18 232 levels. Second, the present results revealed a significant correlation between BMI and MUAC.  
19  
20 233 This study provides evidence to suggest that MUAC is a valid, single measurement for  
21  
22 234 identifying this dual problem of aberrant growth and over-nutrition on the one hand and under-  
23  
24 235 nutrition on the other, through extended routine growth monitoring of children. However, more  
25  
26 236 studies are required to establish the validity and reliability of this tool.  
27  
28  
29  
30  
31  
32  
33  
34  
35  
36  
37  
38  
39  
40  
41  
42  
43  
44  
45  
46  
47  
48  
49  
50  
51  
52  
53  
54  
55  
56  
57  
58  
59  
60

1  
2  
3 237 **What is known about the subject?**  
4

5 238 • Emerging economies face a dual problem of under-nutrition and over-nutrition.

6  
7  
8 239 • Detecting these problems using height-based parameters is not easy in a low-resource  
9  
10 240 setting.

11  
12 241 **What this study adds?**  
13

14  
15 242 This study suggests that MUAC is a simple, valid, and single measure for identifying this dual  
16  
17 243 problem in a low-resource setting, and undernutrition is a bigger problem than obesity.  
18

19 244

20  
21 245 **Funding statement:** This research received no specific grant from any funding agency in public,  
22  
23 246 commercial, or not-for-profit sectors.  
24  
25

26  
27 247 **Declaration of interests:** All authors have completed the ICMJE uniform disclosure form and  
28  
29 248 confirm no support from any organization for the submitted work; no financial relationships with  
30  
31 249 any organizations that might have an interest in the submitted work in the previous three years;  
32  
33 250 no other relationships or activities that could appear to have influenced the submitted work.  
34  
35

36  
37  
38 251

39  
40 252 **Author contributions**  
41

42 253 SD-Conceptualization; Data analysis; Manuscript writing.  
43  
44

45 254 SM-Data collection; data analysis; manuscript writing.  
46  
47

48 255 AK-Data analysis; manuscript writing.  
49

50 256 ED-Data collection; manuscript writing.  
51  
52

53 257  
54  
55  
56  
57  
58  
59  
60

## References

1. Nestle M. Rethinking nutritional policies in developing countries taking into account the double burden of malnutrition. 2016 Oct 18 [Cited 2016 Oct 18]. In: Ideas4Development Blog [Internet]. Available from: <https://ideas4development.org/en/rethinking-nutritional-policies>
2. Shrimpton R, Rokx C. Health, nutrition, and population (HNP) discussion paper: The double burden of malnutrition: a review of global evidence. 2012 [cited 12 Aug 2002]. [Internet]. Washington (DC): The World Bank. Available from: <http://documents.worldbank.org/curated/en/905651468339879888/The-double-burden-of-malnutrition-a-review-of-global-evidence>
3. Prentice AM. The double burden of malnutrition in countries passing through the economic transition. *Ann Nutr Metab.* 2018; 72(suppl 3):47–54. doi: 10.1159/000487383.
4. Dinsa GD, Goryakin Y, Fumagalli E, Suhrcke M. Obesity and socioeconomic status in developing countries: a systematic review. *Obes Rev.* 2012; 13(11):1067–1079. doi: 10.1111/j.1467-789X.2012.01017.
5. Kennedy G, Nantel G, Shetty P. Assessment of the double burden of malnutrition in six case study countries. In: *The double burden of malnutrition: case studies from six developing countries.* Rome, Italy: Food and Agriculture Organization of the United Nations; 2006. pp. 1–18.
6. Kotani K, Nishida M, Yamashita S, Funahashi T, Fujioka S, Tokunaga K, et al. Two decades of annual medical examinations in Japanese obese children: do obese children grow into obese adults? *Int J Obes Relat Metab Disord.* 1997; 21:912–921.



- 1  
2  
3 278 7. de Wilde JA, vanDommelen P, Middelkoop BJ. Appropriate body mass index cut-offs to  
4  
5 279 determine thinness, overweight and obesity in South Asian children in the Netherlands.  
6  
7  
8 280 PLoSOne.2013;8(12):e82822.doi:10.1371/journal.pone.0082822.  
9  
10  
11 281 8. World Health Organization Expert Consultation. Appropriate body-mass index for Asian  
12  
13 282 populations and its implications for policy and intervention strategies.Lancet.2004;363:157–  
14  
15 283 163.doi: 10.1016/S0140-6736(03)15268-3.  
16  
17  
18 284 9.Liu A, Hills AP, Hu X, Li Y, Du L, Xu Y, et al. Waist circumference cut-off values for the  
19  
20  
21 285 prediction of cardiovascular risk factors clustering in Chinese school-aged children: a cross-  
22  
23 286 sectional study. BMC Public Health. 2010;10:82. doi: 10.1186/1471-2458-10-82.  
24  
25  
26 287 10. Craig E, Bland R, Ndirangu J, Reilly JJ.Use of mid-upper arm circumference for determining  
27  
28  
29 288 overweight and overfatness in children and adolescents.Arch Dis Child.2014;99:763–766. doi:  
30  
31 289 10.1136/archdischild-2013-305137 763.  
32  
33  
34 290 11.Chaput JP, Katzmarzyk PT, Barnes JD, Fogelholm M, Hu G, Kuriyan R, et al. Mid-upper arm  
35  
36 291 circumference as a screening tool for identifying children with obesity: a 12-country  
37  
38  
39 292 study.PediatrObes. 2017;12(6):439–445. doi: 10.1111/ijpo.12162.  
40  
41  
42 293 12. Asif M, Aslam M, Altaf S. Mid-upper-arm circumference as a screening measure for  
43  
44 294 identifying children with elevated body mass index: a study for Pakistan. Korean J  
45  
46 295 Pediatr.2018;61(1):6–11.doi: 10.3345/kjp.2018.61.1.6.  
47  
48  
49 296 13. Jaiswal M, Bansal R, Agarwal A. Role of mid-upper arm circumference for determining  
50  
51  
52 297 overweight and obesity in children and adolescents. J ClinDiagn Res. 2017;11(8):SC05–  
53  
54 298 SC08.doi: 10.7860/JCDR/2017/27442.10422.  
55  
56  
57  
58  
59  
60

- 1  
2  
3 299 14. Lu Q, Wang R, Lou DH, Ma CM, Liu XL, Yin FZ. Mid-upper-arm circumference and arm-  
4  
5 300 to-height ratio in evaluation of overweight and obesity in Han  
6  
7 301 children. *Pediatr Neonatol*. 2014;55:14–19. doi: 10.1016/j.pedneo.2013.05.004.  
8  
9  
10 302 15. Talma H, van Dommelen P, Schweizer JJ, Bakker B, Kist-van Holthe JE, Chinpaw JMM, et  
11  
12 303 al. Is mid-upper arm circumference in Dutch children useful in identifying obesity? *Arch Dis*  
13  
14 304 *Child*. 2019;104(2):159–165. doi: 10.1136/archdischild-2017-313528.  
15  
16  
17  
18 305 16. Roberfroid D, Hammami N, Lachat C, Weise Prinzo Z, Sibson V, Guesdon B, et al.  
19  
20 306 Utilization of mid-upper arm circumference versus weight-for-height in nutritional rehabilitation  
21  
22 307 programmes: asystematic review of evidence. Geneva, Switzerland: World Health Organization;  
23  
24 308 2013.  
25  
26  
27  
28 309 17. WHOMulticentre Growth Reference Study Group. WHO child growth standards based on  
29  
30 310 length/height, weight and age. *Acta Paediatr*. 2006; 450(Suppl.):76–85.  
31  
32  
33  
34 311 18. Veugelers PJ, Fitzgerald AL. Effectiveness of school programs in preventing childhood  
35  
36 312 obesity: a multilevel comparison. *Am J Pub Health*. 2005;95(3):432–435. doi:  
37  
38 313 10.2105/AJPH.2004.045898.  
39  
40  
41  
42 314 19. Ludwig J, Sanbonmatsu L, Gennetian L, Adam E, Duncan GJ, Katz LF, et al.  
43  
44 315 Neighborhoods, obesity, and diabetes—a randomized social experiment. *N Engl J*  
45  
46 316 *Med*. 2011;365:1509–1519. doi: 10.1056/NEJMsa1103216.  
47  
48  
49  
50 317 20. Zenk SN, Powell LM, Rimkus L, Isgor Z, Barker DC, Ohri-Vachaspati P, et al. Relative and  
51  
52 318 absolute availability of healthier food and beverage alternatives across communities in the  
53  
54 319 United States. *Am J Public Health*. 2014;104(11):2170–2178. doi: 10.2105/AJPH.2014.302113.  
55  
56  
57  
58  
59  
60

- 1  
2  
3 320 21. Geserick M, Vogel M, Gausche R, Lipek T, Spielau U, Keller E, et al. Acceleration of BMI in  
4  
5 321 early childhood and risk of sustained obesity. *N Engl J Med*. 2018; 379:1303–1312. doi:  
6  
7 322 10.1056/NEJMoa1803527.  
8  
9  
10 323 22. UNICEF India. Stunting. December 2018. [Internet]. New Delhi, India: UNICEF. Available  
11  
12 324 from: <http://unicef.in/Whatwedo/10/Stunting>  
13  
14  
15  
16 325 23. Popkin BM, Richards MK, Montiero CA. Stunting is associated with overweight in children  
17  
18 326 in countries that are undergoing the nutrition transition. *J Nutr*. 1996; 126(12):3009–3016. doi:  
19  
20 327 10.1093/jn/126.12.3009.  
21  
22  
23  
24 328 24. Andreyeva T, Kelly IR, Harris JL. Exposure to food advertising on television: associations  
25  
26 329 with children's fast food and soft drink consumption and obesity. *Econ Hum Biol*.  
27  
28 330 2011;9(3):221–233. doi: 10.1016/j.ehb.2011.02.004. Epub 2011 Mar 5.  
29  
30  
31  
32 331 25. Kolčić I. Double burden of malnutrition: silent driver of double burden of disease in low-  
33  
34 332 and middle-income countries. *J Glob Health*. 2012;2(2):020303. doi: 10.7189/jogh.02.020303.  
35  
36  
37 333 26. Chan RSM, Woo J. Prevention of overweight and obesity: how effective is the current public  
38  
39 334 health approach. *Int J Environ Res Public Health*. 2010;7(3):765–783.  
40  
41 335 doi:10.3390/ijerph703076526.  
42  
43  
44  
45 336 27. Jaacks LM, Vandevijvere S, Pan A, McGowan CJ, Wallace C, Imamura F, et al. The obesity  
46  
47 337 transition: stages of the global epidemic. *Lancet Diabetes Endocrinol*. 2019. doi: 10.1016/S2213-  
48  
49 338 8587(19)30026-9.  
50  
51  
52 339  
53  
54 340

341  
342 **Table 1**  
343 **Correlations between anthropometric parameters among girls (N=424)**  
344

| Variables               |                     | MUAC      | Body weight (kg) | Height (cm) | BMI       |
|-------------------------|---------------------|-----------|------------------|-------------|-----------|
| <b>MUAC</b>             | Pearson Correlation | 1         | .897(**)         | .700(**)    | .826(**)  |
|                         | p-value             |           | 7.34E-152        | 1.21E-63    | 6.86E-107 |
| <b>Body weight (kg)</b> | Pearson Correlation | .897(**)  | 1                | .866(**)    | .776(**)  |
|                         | p-value             | 7.34E-152 |                  | 2.85E-129   | 1.93E-86  |
| <b>Height (cm)</b>      | Pearson Correlation | .700(**)  | .866(**)         | 1           | .385(**)  |
|                         | p-value             | 1.21E-63  | 2.85E-129        |             | 2.16E-16  |
| <b>BMI</b>              | Pearson Correlation | .826(**)  | .776(**)         | .385(**)    | 1         |
|                         | p-value             | 6.86E-107 | 1.93E-86         | 2.16E-16    |           |

345 \*\* Correlation is significant at the 0.01 level (2-tailed).

346 **Table 2**  
 347 **Correlations between anthropometric parameters among boys (N=1020)**  
 348

| Variables               |                     | MUAC      | Body weight (kg) | Height (cm) | BMI       |
|-------------------------|---------------------|-----------|------------------|-------------|-----------|
| <b>MUAC</b>             | Pearson Correlation | 1         | .911(**)         | .780(**)    | .847(**)  |
|                         | p-value             |           | 0.0001           | 9.60E-210   | 2.21E-281 |
| <b>Body weight (kg)</b> | Pearson Correlation | .911(**)  | 1                | .886(**)    | .861(**)  |
|                         | p-value             | 0.0001    |                  | 0.0001      | 1.25E-301 |
| <b>Height (cm)</b>      | Pearson Correlation | .780(**)  | .886(**)         | 1           | .564(**)  |
|                         | p-value             | 9.60E-210 | 0.0001           |             | 1.02E-86  |
| <b>BMI</b>              | Pearson Correlation | .847(**)  | .861(**)         | .564(**)    | 1         |
|                         | p-value             | 2.21E-281 | 1.25E-301        | 1.02E-86    |           |

349 \*\* Correlation is significant at the 0.01 level (2-tailed).

**Table 3**  
**Distribution of nutrition conditions based on BMI and MUAC Z-scores \*\***

| <b>Condition</b>                        | <b>Based on BMI Z-scores<br/>No (%)</b> | <b>Based on MUACZ-scores<br/>No (%)</b> |
|-----------------------------------------|-----------------------------------------|-----------------------------------------|
| <b>Pre-obese</b>                        | BMI >1 to 2 SD<br>136 (9.4%)            | MUAC>1to2SD<br>135 (9.3%)               |
| <b>Overweight</b>                       | BMI>2 to 3 SD<br>36 (2.5%)              | MUAC>2 to 3SD<br>43 (3.0%)              |
| <b>Obese</b>                            | BMI >3SD<br>21 (1.5%)                   | MUAC>3SD<br>19(1.3%)                    |
| <b>Possible risk of<br/>underweight</b> | BMI <-1 to -2 SD<br>141 (9.8%)          | MUAC ≤ -1 to -2SD<br>181 (12.5%)        |
| <b>Thin</b>                             | BMI <-2 to -3 SD<br>5 (0.3%)            | MUAC<-2 to -3SD<br>6 (0.4%)             |
| <b>Severely thin</b>                    | BMI <-3SD<br>5 (0.3%)                   | MUAC<-3 SD<br>1(0.1%)                   |

\*\*Modified WHO Classification of nutrition conditions based on anthropometry  
 BMI = Body Mass Index; MUAC = Mid-upper-arm circumference

1  
2  
3  
4  
5  
6  
7  
8  
9  
10  
11  
12  
13  
14  
15  
16  
17  
18  
19  
20  
21  
22  
23  
24  
25  
26  
27  
28  
29  
30  
31  
32  
33  
34  
35  
36  
37  
38  
39  
40  
41  
42  
43  
44  
45  
46  
47  
48  
49  
50  
51  
52  
53  
54  
55  
56  
57  
58  
59  
60

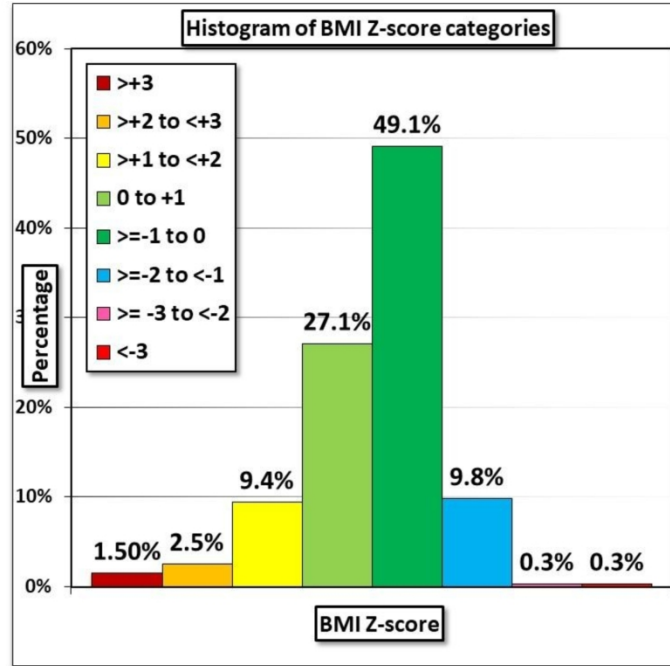

215x279mm (300 x 300 DPI)

1  
2  
3  
4  
5  
6  
7  
8  
9  
10  
11  
12  
13  
14  
15  
16  
17  
18  
19  
20  
21  
22  
23  
24  
25  
26  
27  
28  
29  
30  
31  
32  
33  
34  
35  
36  
37  
38  
39  
40  
41  
42  
43  
44  
45  
46  
47  
48  
49  
50  
51  
52  
53  
54  
55  
56  
57  
58  
59  
60

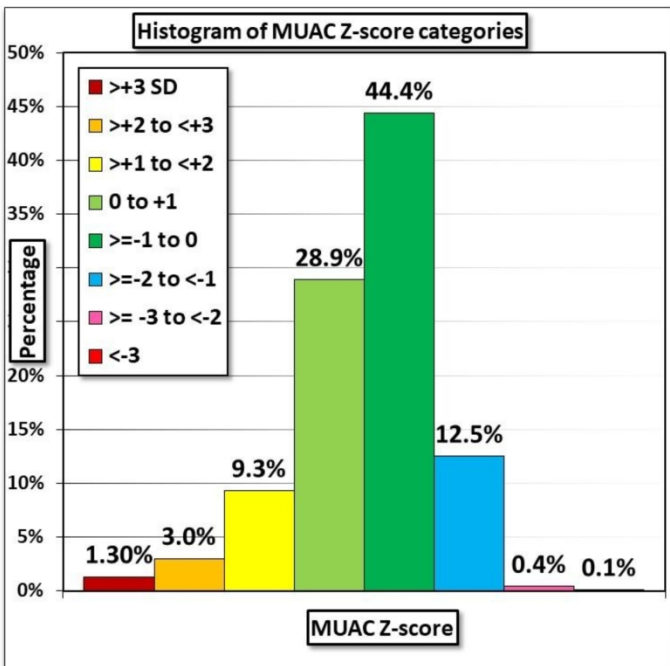

215x279mm (300 x 300 DPI)



**Table 1 (S)**  
**Comparison of variables between girls and boys**

| Variables ^             | Girls (n=424) |       |        |       | Boys (n=1020) |       |        |       | Mann-Whitney Test |                   |
|-------------------------|---------------|-------|--------|-------|---------------|-------|--------|-------|-------------------|-------------------|
|                         | Mean          | SD    | Median | IQR   | Mean          | SD    | Median | IQR   | Z-value           | p-value           |
| <b>Age (years)</b>      | 7.63          | 2.82  | 7.00   | 5.00  | 8.80          | 3.69  | 9.00   | 5.00  | -5.162            | <b>2.44E-07 *</b> |
| <b>Height (cm)</b>      | 125.16        | 16.95 | 125.00 | 26.00 | 134.06        | 22.16 | 133.15 | 34.00 | -6.626            | <b>3.44E-11 *</b> |
| <b>Body weight (kg)</b> | 22.48         | 8.83  | 20.20  | 10.40 | 28.93         | 14.96 | 24.20  | 19.40 | -7.215            | <b>5.41E-13 *</b> |
| <b>BMI</b>              | 13.84         | 2.33  | 13.20  | 2.14  | 15.04         | 3.31  | 13.98  | 3.24  | -7.374            | <b>1.66E-13 *</b> |
| <b>MUAC</b>             | 17.52         | 2.61  | 16.85  | 3.30  | 18.94         | 3.83  | 17.95  | 5.00  | -6.233            | <b>4.59E-10 *</b> |

^ All data failed a "Normality Test," so a Mann-Whitney U Rank Sum Test was applied.

\* Difference is statistically significant.

BMI=Body Mass Index; MUAC=Mid-upper-arm circumference

**Table 2 (S)**  
**Distribution of variables among all participants**

| <b>Variables</b>        | <b>Mean</b> | <b>SD</b> | <b>Median</b> | <b>IQR</b> | <b>Minimum</b> | <b>Maximum</b> |
|-------------------------|-------------|-----------|---------------|------------|----------------|----------------|
| <b>Age (years)</b>      | 8.46        | 3.50      | 9.00          | 6.00       | 3.00           | 16.00          |
| <b>Body weight (kg)</b> | 27.04       | 13.77     | 23.10         | 16.20      | 9.00           | 97.50          |
| <b>Height (cm)</b>      | 131.45      | 21.16     | 130.00        | 32.00      | 84.00          | 188.00         |
| <b>Height (meters)</b>  | 1.31        | 0.21      | 1.30          | 0.32       | 0.84           | 1.88           |
| <b>BMI</b>              | 14.69       | 3.10      | 13.78         | 2.89       | 6.58           | 36.10          |
| <b>MUAC</b>             | 18.53       | 3.57      | 17.50         | 4.30       | 12.20          | 35.00          |

SD = standard deviation; IQR = inter-quartile range; BMI = Body Mass Index; MUAC = Mid-upper-arm circumference

**Table 3 (S)**  
**Age-wise distribution of BMI among all participants**

| Age (years) | BMI   |      |        |       |
|-------------|-------|------|--------|-------|
|             | Mean  | SD   | Median | IQR   |
| 3           | 13.37 | 1.34 | 13.26  | 1.61  |
| 4           | 13.04 | 1.69 | 13.07  | 1.46  |
| 5           | 13.01 | 1.13 | 12.80  | 1.02  |
| 6           | 13.85 | 2.09 | 13.39  | 1.55  |
| 7           | 13.54 | 1.48 | 13.20  | 1.90  |
| 8           | 13.94 | 2.22 | 13.37  | 2.01  |
| 9           | 13.70 | 1.73 | 13.36  | 1.66  |
| 10          | 14.74 | 2.84 | 13.97  | 2.77  |
| 11          | 15.48 | 3.03 | 14.89  | 3.60  |
| 12          | 15.89 | 3.01 | 15.63  | 3.87  |
| 13          | 18.22 | 3.34 | 17.51  | 3.30  |
| 14          | 18.33 | 3.88 | 17.28  | 4.53  |
| 15          | 19.09 | 4.32 | 18.01  | 6.52  |
| 16          | 21.38 | 5.89 | 23.55  | 11.09 |

SD = standard deviation; IQR = inter-quartile range

**Table 4 (S)**  
**Age-wise distribution of MUAC among all participants**

| Age (years) | MUAC  |      |        |      |
|-------------|-------|------|--------|------|
|             | Mean  | SD   | Median | IQR  |
| 3           | 15.39 | 1.24 | 15.20  | 1.50 |
| 4           | 15.50 | 1.16 | 15.50  | 1.10 |
| 5           | 16.19 | 1.17 | 15.95  | 1.20 |
| 6           | 16.83 | 2.07 | 16.50  | 1.95 |
| 7           | 16.98 | 1.75 | 16.70  | 2.00 |
| 8           | 17.97 | 2.11 | 17.50  | 1.61 |
| 9           | 17.79 | 1.78 | 17.50  | 2.08 |
| 10          | 19.02 | 2.63 | 18.50  | 3.45 |
| 11          | 20.16 | 3.04 | 19.50  | 3.93 |
| 12          | 20.87 | 2.79 | 20.50  | 4.00 |
| 13          | 22.91 | 2.79 | 22.50  | 2.60 |
| 14          | 23.53 | 3.64 | 23.00  | 4.95 |
| 15          | 24.66 | 3.73 | 23.50  | 5.23 |
| 16          | 25.81 | 4.63 | 27.20  | 7.75 |

SD = standard deviation; IQR = inter-quartile range

**Table 5 (S)**  
**Homogeneous Subsets: BMI: Tukey HSD**

| Age (years) | No. | Subset for alpha = 0.05 |        |        |        |        |        |
|-------------|-----|-------------------------|--------|--------|--------|--------|--------|
|             |     | 1                       | 2      | 3      | 4      | 5      | 6      |
| 5           | 132 | 13.011                  |        |        |        |        |        |
| 4           | 146 | 13.038                  |        |        |        |        |        |
| 3           | 102 | 13.366                  | 13.366 |        |        |        |        |
| 7           | 156 | 13.537                  | 13.537 |        |        |        |        |
| 9           | 72  | 13.696                  | 13.696 |        |        |        |        |
| 6           | 109 | 13.852                  | 13.852 | 13.852 |        |        |        |
| 8           | 65  | 13.939                  | 13.939 | 13.939 |        |        |        |
| 10          | 220 |                         | 14.740 | 14.740 | 14.740 |        |        |
| 11          | 182 |                         |        | 15.481 | 15.481 |        |        |
| 12          | 77  |                         |        |        | 15.892 |        |        |
| 13          | 30  |                         |        |        |        | 18.224 |        |
| 14          | 72  |                         |        |        |        | 18.325 |        |
| 15          | 72  |                         |        |        |        | 19.094 |        |
| 16          | 9   |                         |        |        |        |        | 21.380 |
| <b>Sig.</b> |     | 0.836                   | 0.232  | 0.059  | 0.529  | 0.892  | 1.000  |

Means for groups in homogeneous subsets are displayed.  
 BMI = Body Mass Index

**Table 6 (S)**  
**Homogeneous Subsets: MUAC: Tukey HSD (Table No. 4)**

| Age (years) | No. | Subset for alpha = 0.05 |        |        |        |        |        |        |        |        |
|-------------|-----|-------------------------|--------|--------|--------|--------|--------|--------|--------|--------|
|             |     | 1                       | 2      | 3      | 4      | 5      | 6      | 7      | 8      | 9      |
| 3           | 102 | 15.385                  |        |        |        |        |        |        |        |        |
| 4           | 146 | 15.500                  | 15.500 |        |        |        |        |        |        |        |
| 5           | 132 | 16.194                  | 16.194 |        |        |        |        |        |        |        |
| 6           | 109 | 16.826                  | 16.826 | 16.826 |        |        |        |        |        |        |
| 7           | 156 |                         | 16.979 | 16.979 |        |        |        |        |        |        |
| 9           | 72  |                         |        | 17.794 | 17.794 |        |        |        |        |        |
| 8           | 65  |                         |        | 17.972 | 17.972 |        |        |        |        |        |
| 10          | 220 |                         |        |        | 19.015 | 19.015 |        |        |        |        |
| 11          | 182 |                         |        |        |        | 20.161 | 20.161 |        |        |        |
| 12          | 77  |                         |        |        |        |        | 20.871 |        |        |        |
| 13          | 30  |                         |        |        |        |        |        | 22.907 |        |        |
| 14          | 72  |                         |        |        |        |        |        | 23.532 | 23.532 |        |
| 15          | 72  |                         |        |        |        |        |        |        | 24.658 | 24.658 |
| 16          | 9   |                         |        |        |        |        |        |        |        | 25.811 |
| <b>Sig.</b> |     | 0.102                   | 0.08   | 0.421  | 0.314  | 0.423  | 0.961  | 0.987  | 0.452  | 0.412  |

Means for groups in homogeneous subsets are displayed.

MUAC = Mid-upper-arm circumference

Confidential: For Review Only

1  
2  
3  
4  
5  
6  
7  
8  
9  
10  
11  
12  
13  
14  
15  
16  
17  
18  
19  
20  
21  
22  
23  
24  
25  
26  
27  
28  
29  
30  
31  
32  
33  
34  
35  
36  
37  
38  
39  
40  
41  
42  
43  
44  
45  
46  
47  
48  
49  
50  
51  
52  
53  
54  
55  
56  
57  
58  
59  
60
