# Supplementary material for: Double burden of malnutrition among Indian schoolchildren and its measurement: a cross-sectional study in a single school
Source: PubMed Central journal article supplement — BMJ Paediatr Open. 2020 Feb 2;4(1):e000505. doi: 10.1136/bmjpo-2019-000505 (PMC7015044; doi:10.1136/bmjpo-2019-000505), 2020-02-02
Supplement: bmjpo-2019-000505supp001.pdf [file bmjpo-2019-000505supp001.pdf]

**Table 1 (S)**  
**Comparison of variables between girls and boys**

| Variables ^             | Girls (n=424) |       |        |       | Boys (n=1020) |       |        |       | Mann-Whitney Test |                   |
|-------------------------|---------------|-------|--------|-------|---------------|-------|--------|-------|-------------------|-------------------|
|                         | Mean          | SD    | Median | IQR   | Mean          | SD    | Median | IQR   | Z-value           | p-value           |
| <b>Age (years)</b>      | 7.63          | 2.82  | 7.00   | 5.00  | 8.80          | 3.69  | 9.00   | 5.00  | -5.162            | <b>2.44E-07 *</b> |
| <b>Height (cm)</b>      | 125.16        | 16.95 | 125.00 | 26.00 | 134.06        | 22.16 | 133.15 | 34.00 | -6.626            | <b>3.44E-11 *</b> |
| <b>Body weight (kg)</b> | 22.48         | 8.83  | 20.20  | 10.40 | 28.93         | 14.96 | 24.20  | 19.40 | -7.215            | <b>5.41E-13 *</b> |
| <b>BMI</b>              | 13.84         | 2.33  | 13.20  | 2.14  | 15.04         | 3.31  | 13.98  | 3.24  | -7.374            | <b>1.66E-13 *</b> |
| <b>MUAC</b>             | 17.52         | 2.61  | 16.85  | 3.30  | 18.94         | 3.83  | 17.95  | 5.00  | -6.233            | <b>4.59E-10 *</b> |

^ All data failed a "Normality Test," so a Mann-Whitney U Rank Sum Test was applied.

\* Difference is statistically significant.

BMI=Body Mass Index; MUAC=Mid-upper-arm circumference

**Table2 (S)**  
**Distribution of variables among all participants**

| <b>Variables</b>        | <b>Mean</b> | <b>SD</b> | <b>Median</b> | <b>IQR</b> | <b>Minimum</b> | <b>Maximum</b> |
|-------------------------|-------------|-----------|---------------|------------|----------------|----------------|
| <b>Age (years)</b>      | 8.46        | 3.50      | 9.00          | 6.00       | 3.00           | 16.00          |
| <b>Body weight (kg)</b> | 27.04       | 13.77     | 23.10         | 16.20      | 9.00           | 97.50          |
| <b>Height (cm)</b>      | 131.45      | 21.16     | 130.00        | 32.00      | 84.00          | 188.00         |
| <b>Height (meters)</b>  | 1.31        | 0.21      | 1.30          | 0.32       | 0.84           | 1.88           |
| <b>BMI</b>              | 14.69       | 3.10      | 13.78         | 2.89       | 6.58           | 36.10          |
| <b>MUAC</b>             | 18.53       | 3.57      | 17.50         | 4.30       | 12.20          | 35.00          |

SD = standard deviation; IQR = inter-quartile range; BMI = Body Mass Index; MUAC =Mid-upper-arm circumference

**Table 3 (S)**  
**Age-wise distribution of BMI among all participants**

| Age (years) | BMI   |      |        |       |
|-------------|-------|------|--------|-------|
|             | Mean  | SD   | Median | IQR   |
| 3           | 13.37 | 1.34 | 13.26  | 1.61  |
| 4           | 13.04 | 1.69 | 13.07  | 1.46  |
| 5           | 13.01 | 1.13 | 12.80  | 1.02  |
| 6           | 13.85 | 2.09 | 13.39  | 1.55  |
| 7           | 13.54 | 1.48 | 13.20  | 1.90  |
| 8           | 13.94 | 2.22 | 13.37  | 2.01  |
| 9           | 13.70 | 1.73 | 13.36  | 1.66  |
| 10          | 14.74 | 2.84 | 13.97  | 2.77  |
| 11          | 15.48 | 3.03 | 14.89  | 3.60  |
| 12          | 15.89 | 3.01 | 15.63  | 3.87  |
| 13          | 18.22 | 3.34 | 17.51  | 3.30  |
| 14          | 18.33 | 3.88 | 17.28  | 4.53  |
| 15          | 19.09 | 4.32 | 18.01  | 6.52  |
| 16          | 21.38 | 5.89 | 23.55  | 11.09 |

SD = standard deviation; IQR = inter-quartile range

**Table 4 (S)**  
**Age-wise distribution of MUAC among all participants**

| Age (years) | MUAC  |      |        |      |
|-------------|-------|------|--------|------|
|             | Mean  | SD   | Median | IQR  |
| 3           | 15.39 | 1.24 | 15.20  | 1.50 |
| 4           | 15.50 | 1.16 | 15.50  | 1.10 |
| 5           | 16.19 | 1.17 | 15.95  | 1.20 |
| 6           | 16.83 | 2.07 | 16.50  | 1.95 |
| 7           | 16.98 | 1.75 | 16.70  | 2.00 |
| 8           | 17.97 | 2.11 | 17.50  | 1.61 |
| 9           | 17.79 | 1.78 | 17.50  | 2.08 |
| 10          | 19.02 | 2.63 | 18.50  | 3.45 |
| 11          | 20.16 | 3.04 | 19.50  | 3.93 |
| 12          | 20.87 | 2.79 | 20.50  | 4.00 |
| 13          | 22.91 | 2.79 | 22.50  | 2.60 |
| 14          | 23.53 | 3.64 | 23.00  | 4.95 |
| 15          | 24.66 | 3.73 | 23.50  | 5.23 |
| 16          | 25.81 | 4.63 | 27.20  | 7.75 |

SD = standard deviation; IQR = inter-quartile range

**Table 5 (S)**  
**Homogeneous Subsets: BMI: Tukey HSD**

| Age (years) | No. | Subset for alpha = 0.05 |        |        |        |        |        |
|-------------|-----|-------------------------|--------|--------|--------|--------|--------|
|             |     | 1                       | 2      | 3      | 4      | 5      | 6      |
| 5           | 132 | 13.011                  |        |        |        |        |        |
| 4           | 146 | 13.038                  |        |        |        |        |        |
| 3           | 102 | 13.366                  | 13.366 |        |        |        |        |
| 7           | 156 | 13.537                  | 13.537 |        |        |        |        |
| 9           | 72  | 13.696                  | 13.696 |        |        |        |        |
| 6           | 109 | 13.852                  | 13.852 | 13.852 |        |        |        |
| 8           | 65  | 13.939                  | 13.939 | 13.939 |        |        |        |
| 10          | 220 |                         | 14.740 | 14.740 | 14.740 |        |        |
| 11          | 182 |                         |        | 15.481 | 15.481 |        |        |
| 12          | 77  |                         |        |        | 15.892 |        |        |
| 13          | 30  |                         |        |        |        | 18.224 |        |
| 14          | 72  |                         |        |        |        | 18.325 |        |
| 15          | 72  |                         |        |        |        | 19.094 |        |
| 16          | 9   |                         |        |        |        |        | 21.380 |
| <b>Sig.</b> |     | 0.836                   | 0.232  | 0.059  | 0.529  | 0.892  | 1.000  |

Means for groups in homogeneous subsets are displayed.

BMI = Body Mass Index

**Table 6 (S)**  
**Homogeneous Subsets: MUAC: Tukey HSD (Table No. 4)**

| Age (years) | No. | Subset for alpha = 0.05 |        |        |        |        |        |        |        |        |
|-------------|-----|-------------------------|--------|--------|--------|--------|--------|--------|--------|--------|
|             |     | 1                       | 2      | 3      | 4      | 5      | 6      | 7      | 8      | 9      |
| 3           | 102 | 15.385                  |        |        |        |        |        |        |        |        |
| 4           | 146 | 15.500                  | 15.500 |        |        |        |        |        |        |        |
| 5           | 132 | 16.194                  | 16.194 |        |        |        |        |        |        |        |
| 6           | 109 | 16.826                  | 16.826 | 16.826 |        |        |        |        |        |        |
| 7           | 156 |                         | 16.979 | 16.979 |        |        |        |        |        |        |
| 9           | 72  |                         |        | 17.794 | 17.794 |        |        |        |        |        |
| 8           | 65  |                         |        | 17.972 | 17.972 |        |        |        |        |        |
| 10          | 220 |                         |        |        | 19.015 | 19.015 |        |        |        |        |
| 11          | 182 |                         |        |        |        | 20.161 | 20.161 |        |        |        |
| 12          | 77  |                         |        |        |        |        | 20.871 |        |        |        |
| 13          | 30  |                         |        |        |        |        |        | 22.907 |        |        |
| 14          | 72  |                         |        |        |        |        |        | 23.532 | 23.532 |        |
| 15          | 72  |                         |        |        |        |        |        |        | 24.658 | 24.658 |
| 16          | 9   |                         |        |        |        |        |        |        |        | 25.811 |
| <b>Sig.</b> |     | 0.102                   | 0.08   | 0.421  | 0.314  | 0.423  | 0.961  | 0.987  | 0.452  | 0.412  |

Means for groups in homogeneous subsets are displayed.

MUAC = Mid-upper-arm circumference
